# Supplementary material for: Synthesis of Functionalized Isoquinolone Derivatives via Rh(III)-Catalyzed [4+2]-Annulation of Benzamides with Internal Acetylene-Containing α-CF3-α-Amino Carboxylates
Source: MDPI journal article supplement (doi:10.3390/molecules27238488), 2022-12-02
Supplement: s1 [file s1]

## Table of contents

|                                                              |        |
|--------------------------------------------------------------|--------|
| 1. $^1\text{H}$ and $^{13}\text{C}$ NMR Spectra of Compounds | S2-S92 |
| 2. Proposed mechanism                                        | S93    |
| 3. X-ray Diffraction Study                                   | S94    |

**$^1\text{H}$  NMR and  $^{13}\text{C}$  NMR Spectra.**

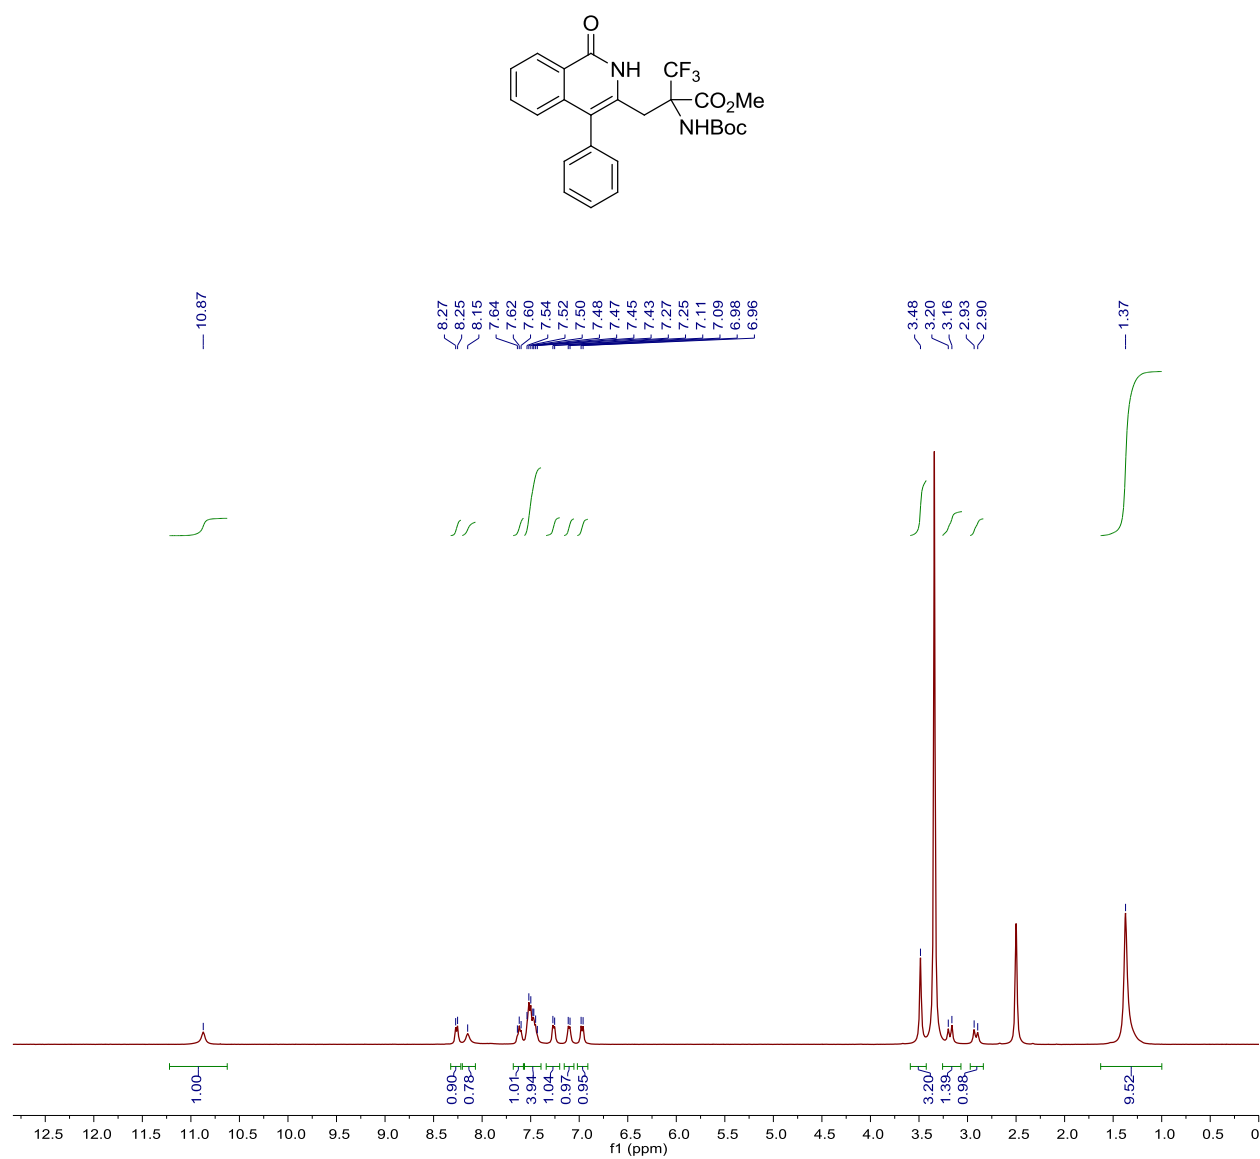

Figure S1.  $^1\text{H}$  spectrum of **3a** in DMSO- $d_6$

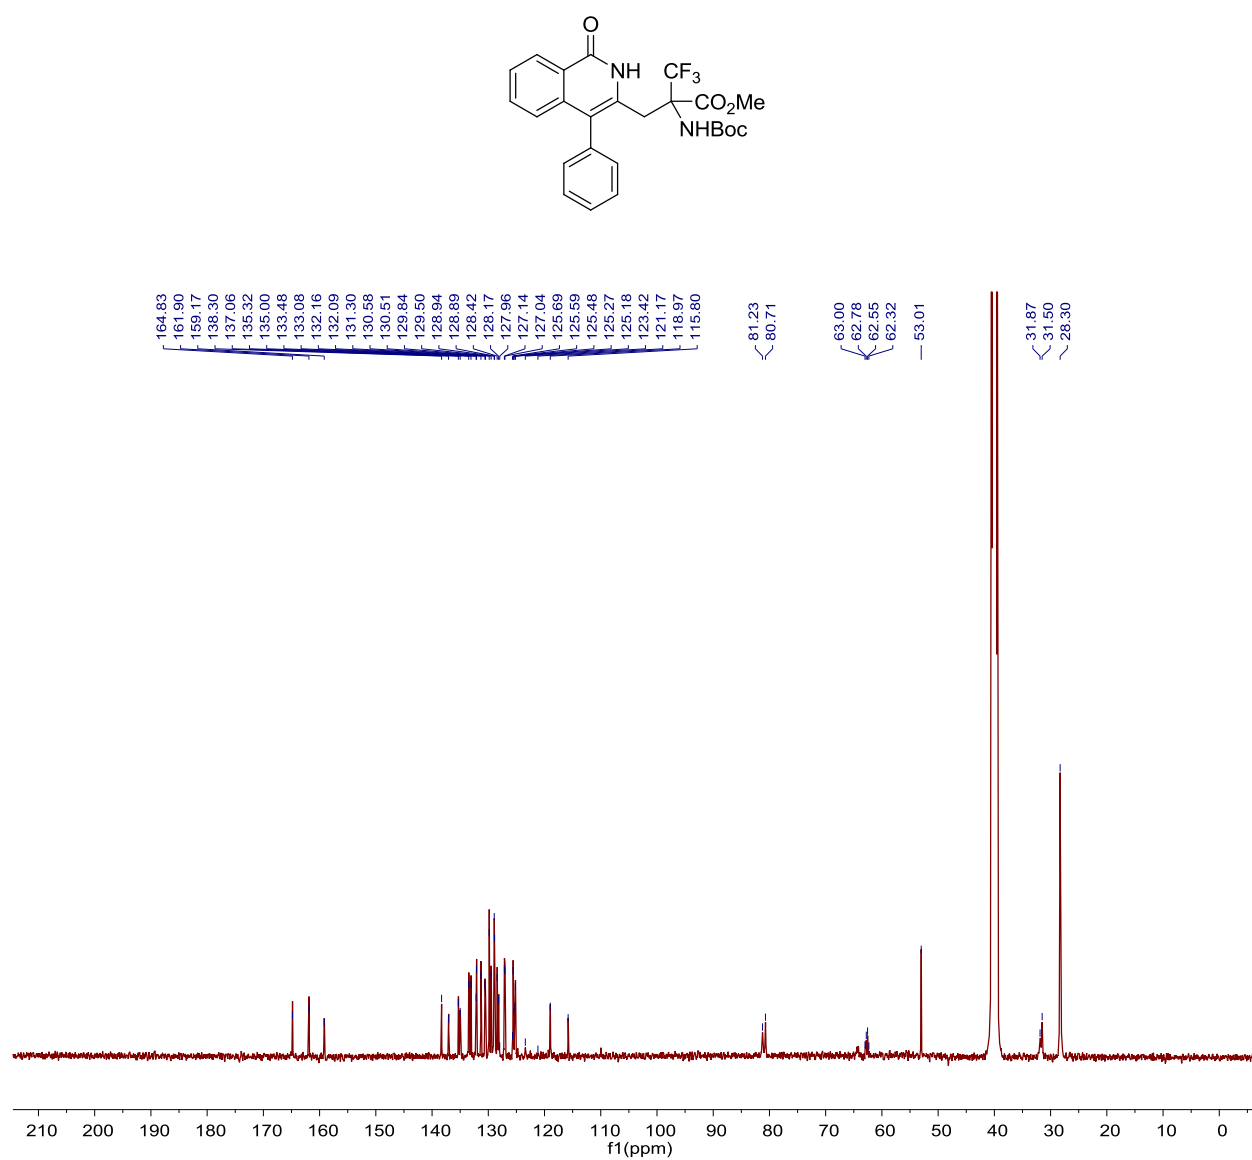

Figure S2.  $^{13}\text{C}$  spectrum of **3a** in DMSO- $d_6$

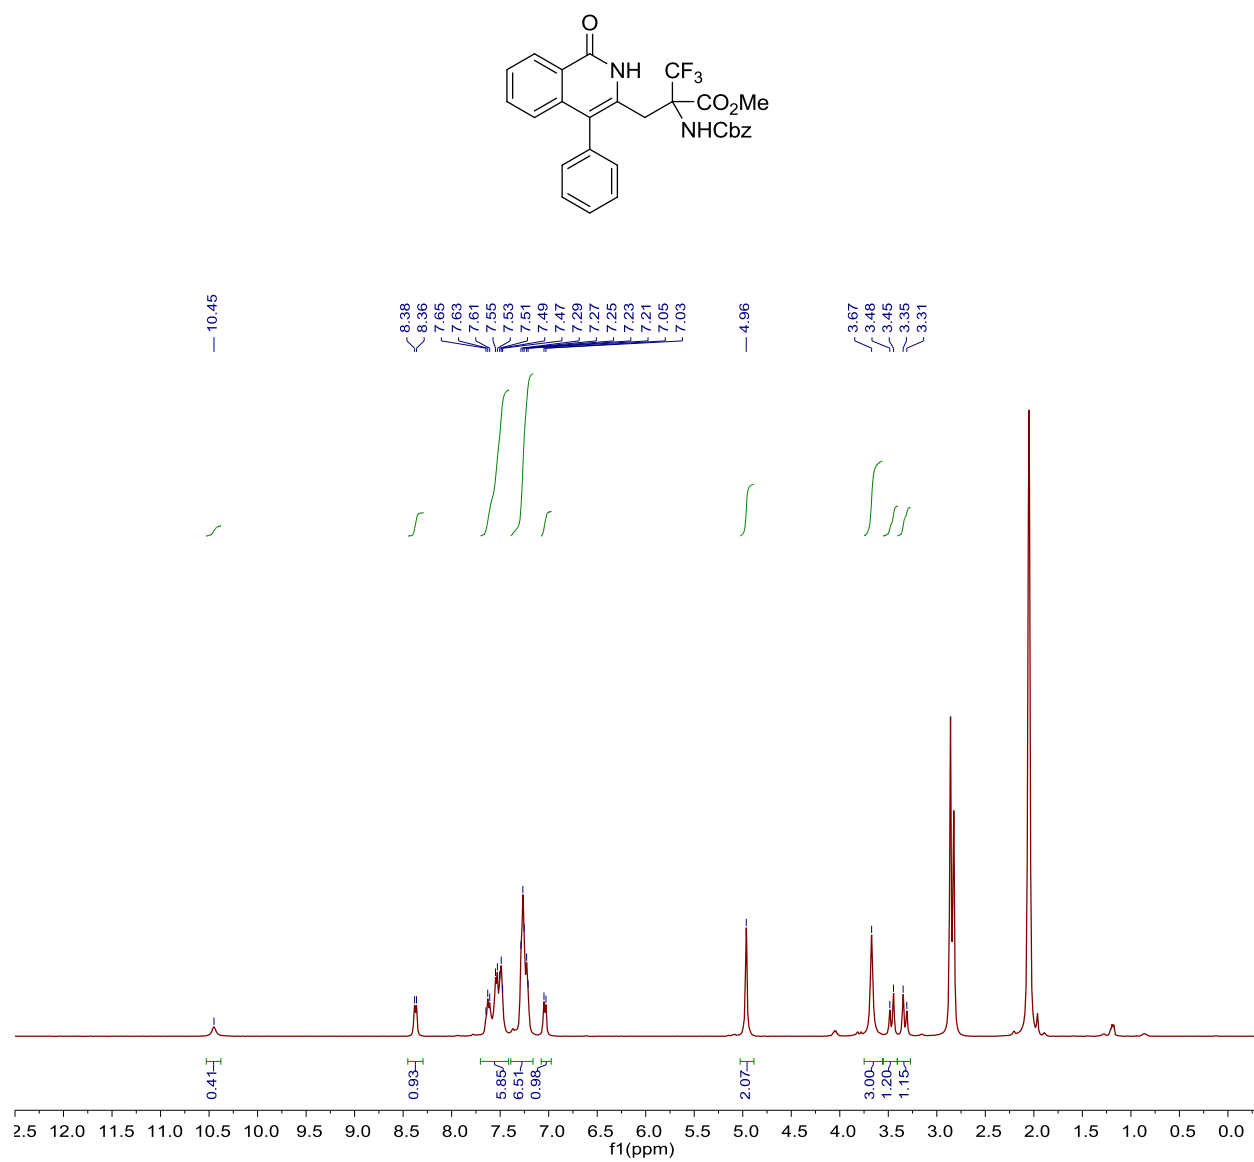

Figure S3. <sup>1</sup>H spectrum of **3b** in acetone-*d*<sub>6</sub>

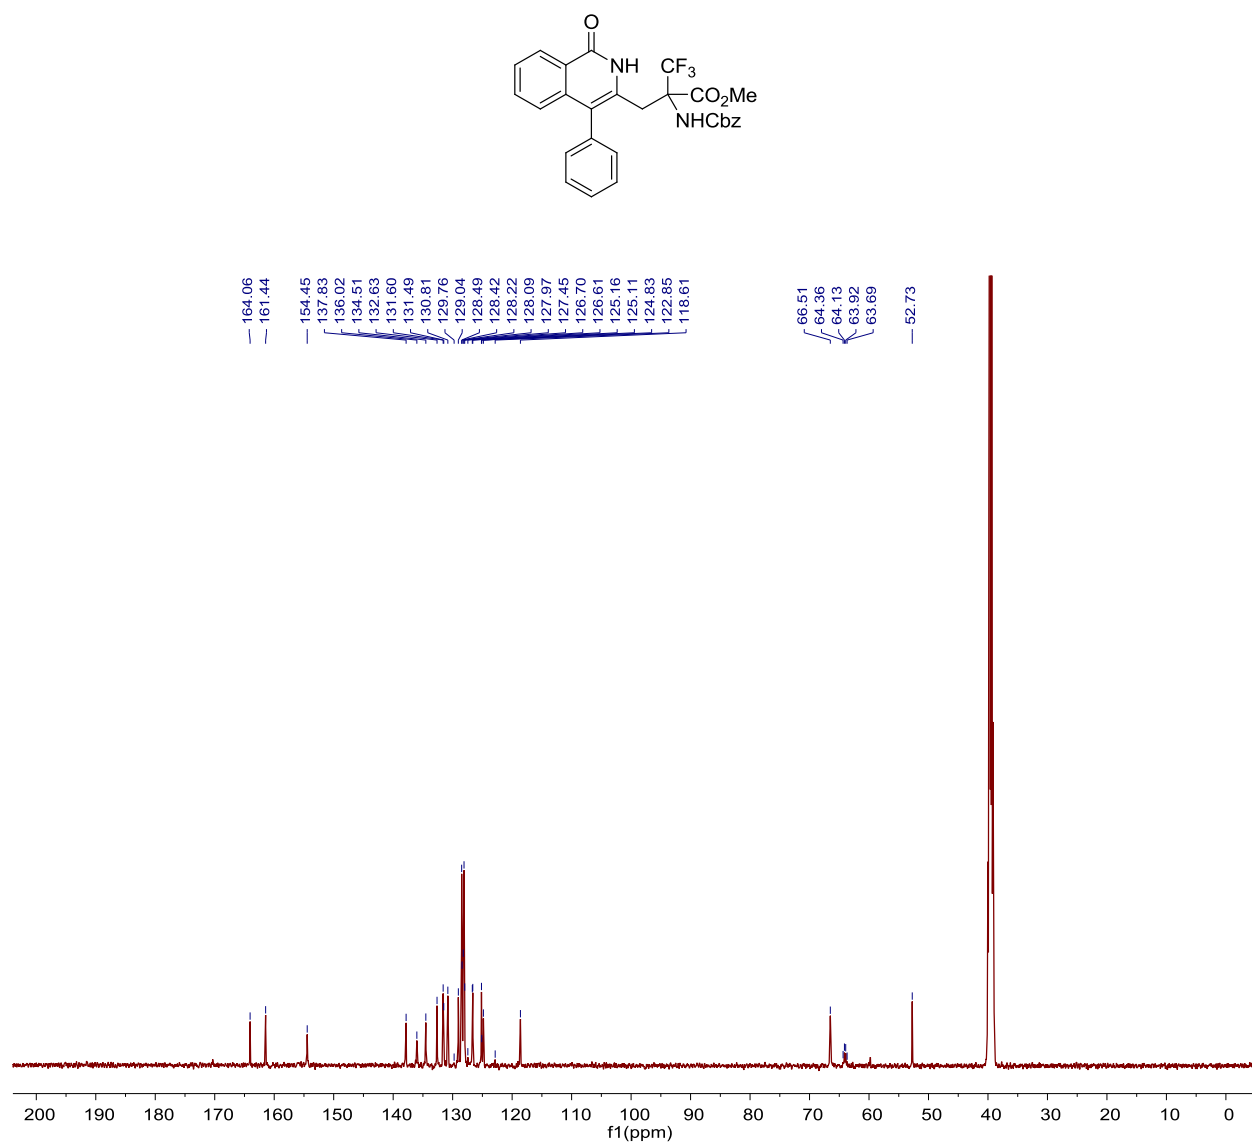

Figure S4.  $^{13}\text{C}$  spectrum of **3b** in DMSO- $d_6$

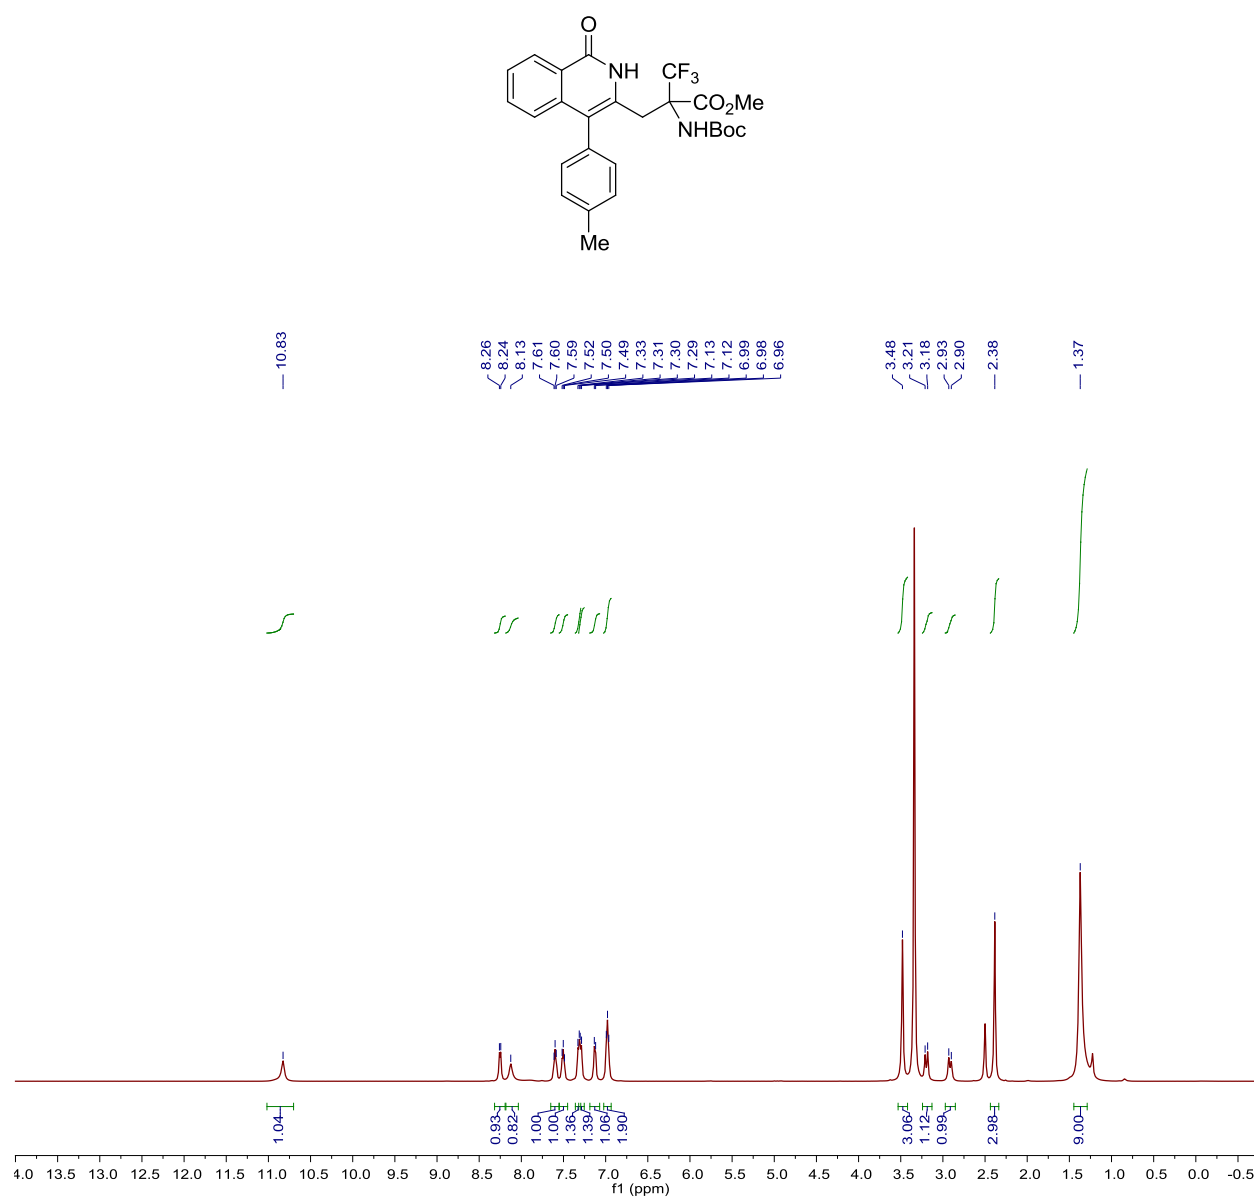

Figure S5.  $^1\text{H}$  spectrum of **3c** in DMSO- $d_6$

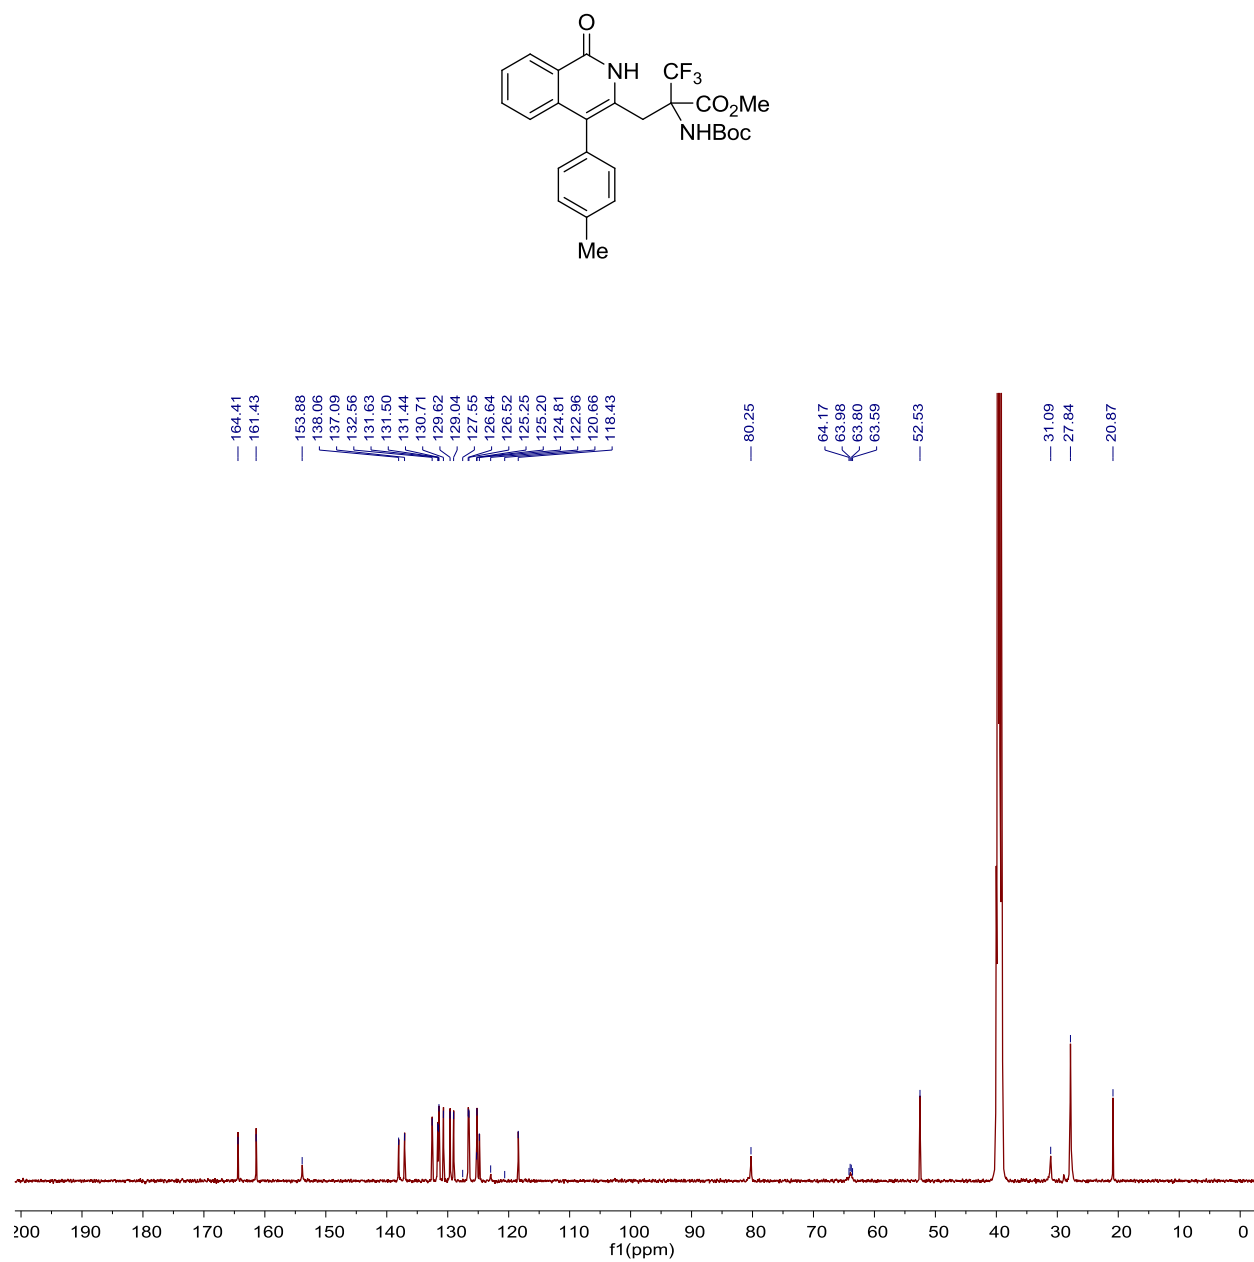

Figure S6.  $^{13}\text{C}$  spectrum of **3c** in DMSO- $d_6$

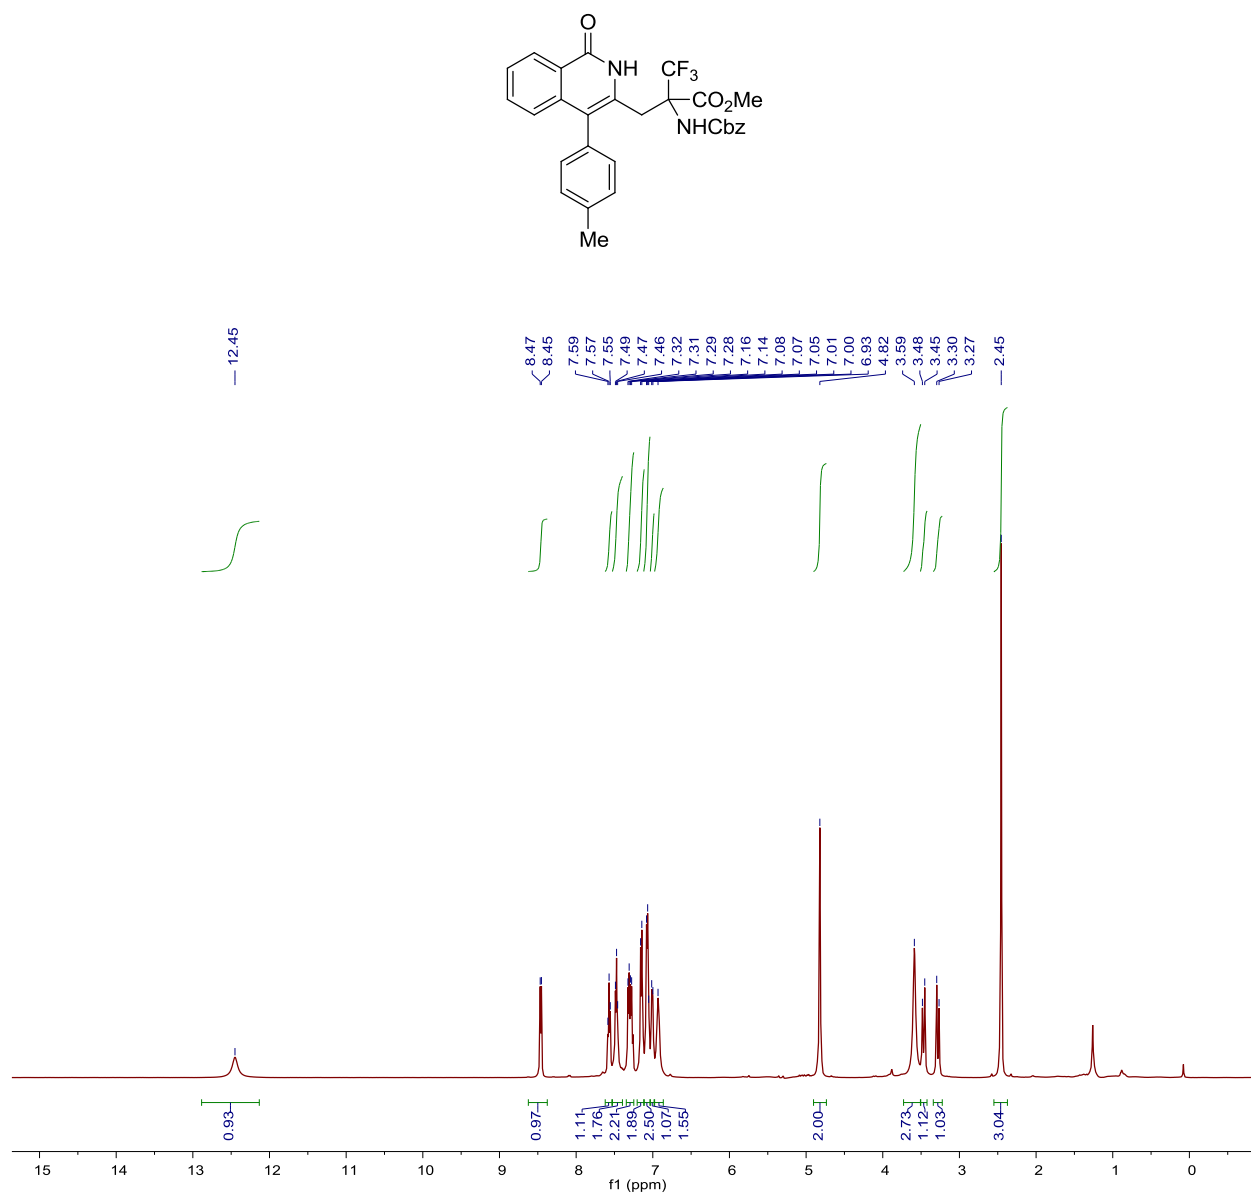

Figure S7.  $^1\text{H}$  spectrum of **3d** in CDCl<sub>3</sub>



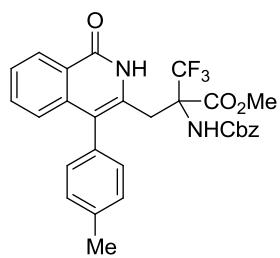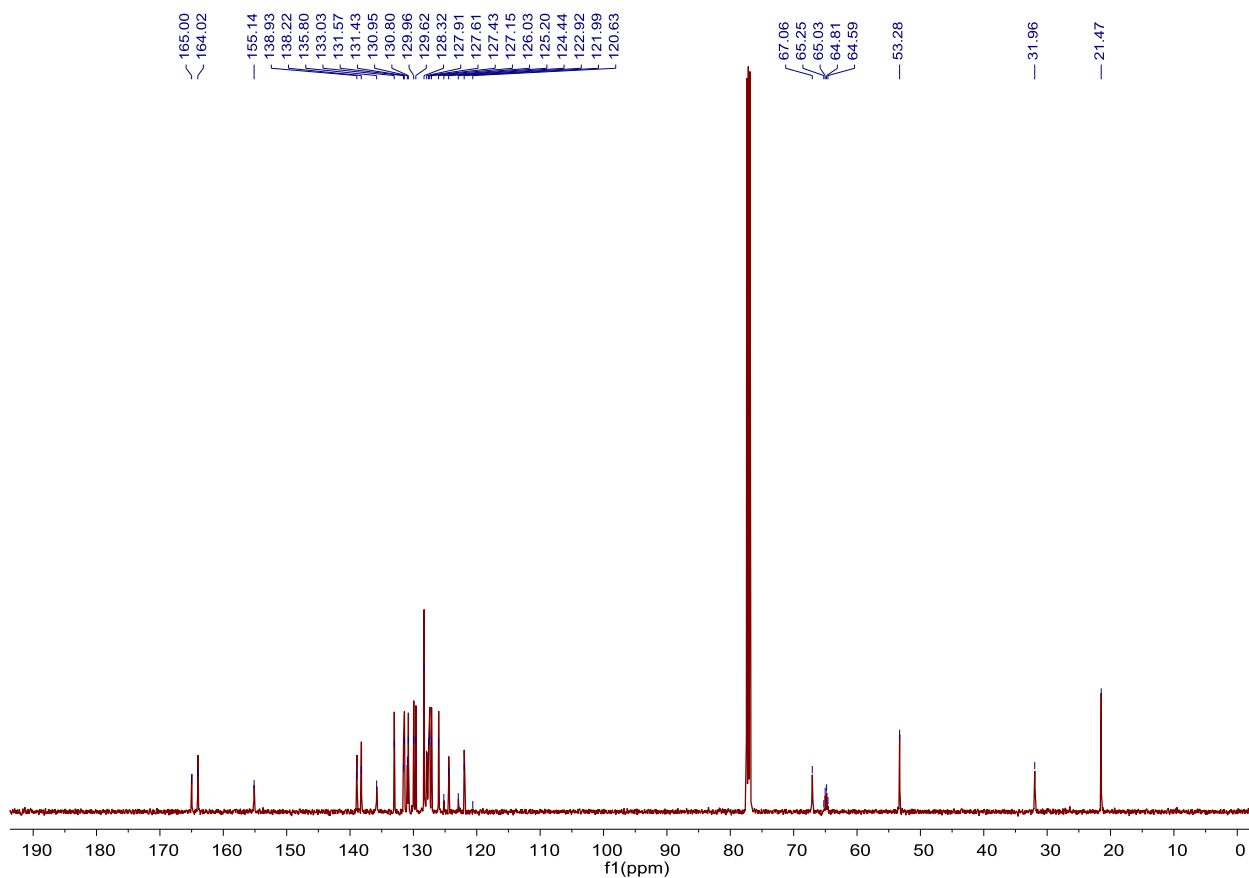

Figure S8.  $^{13}\text{C}$  spectrum of **3d** in  $\text{CDCl}_3$

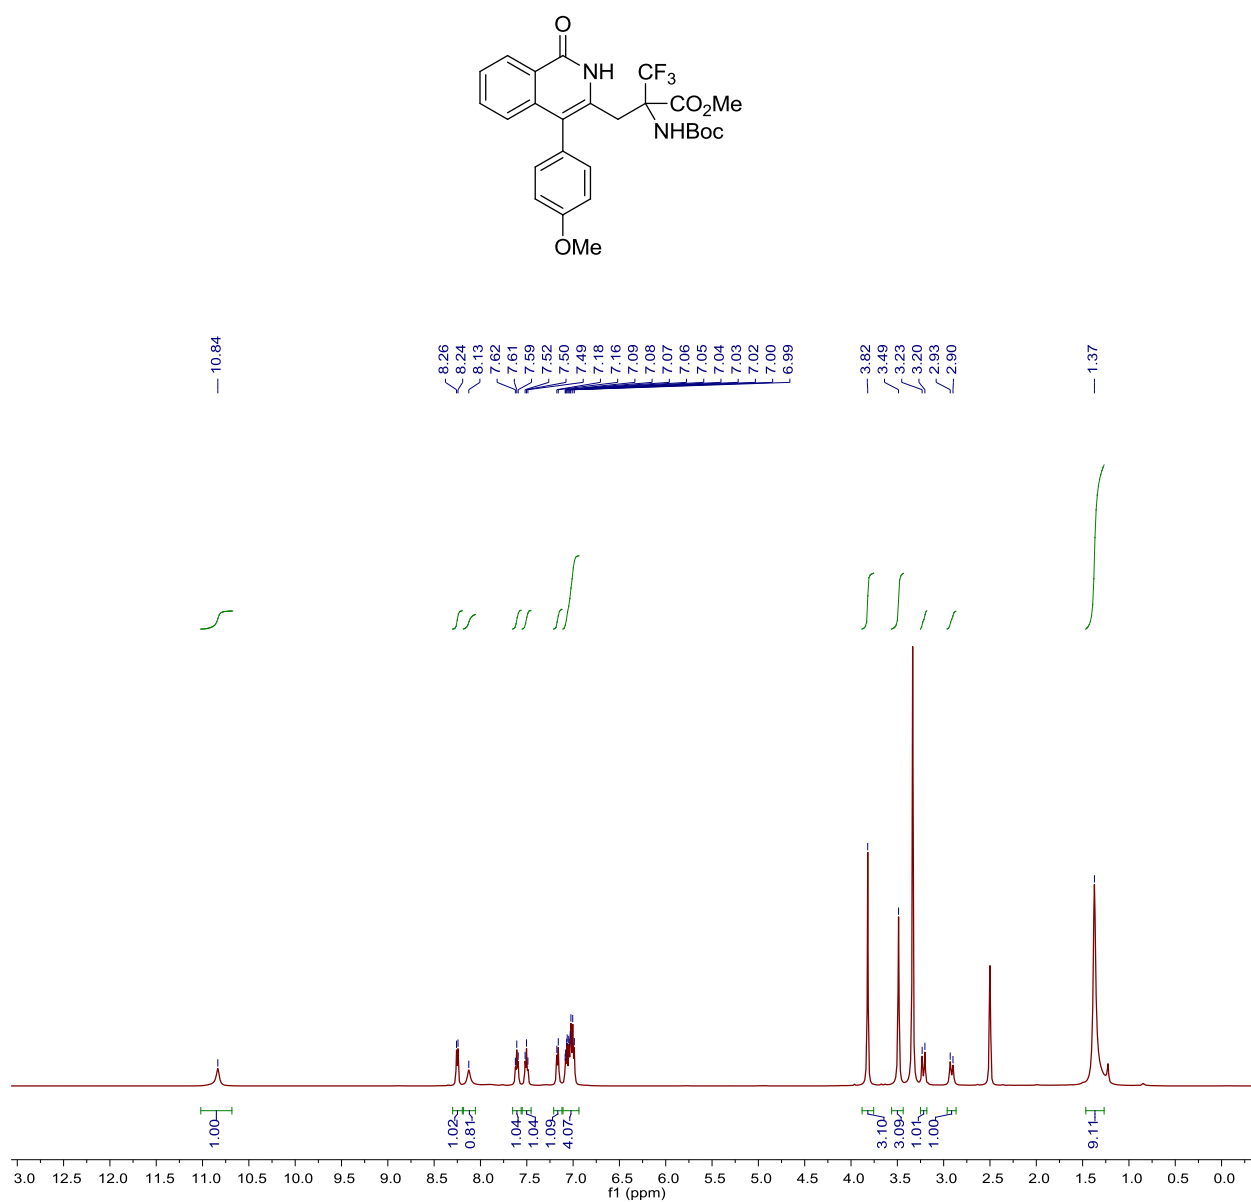

Figure S9. <sup>1</sup>H spectrum of **3e** in DMSO-*d*<sub>6</sub>

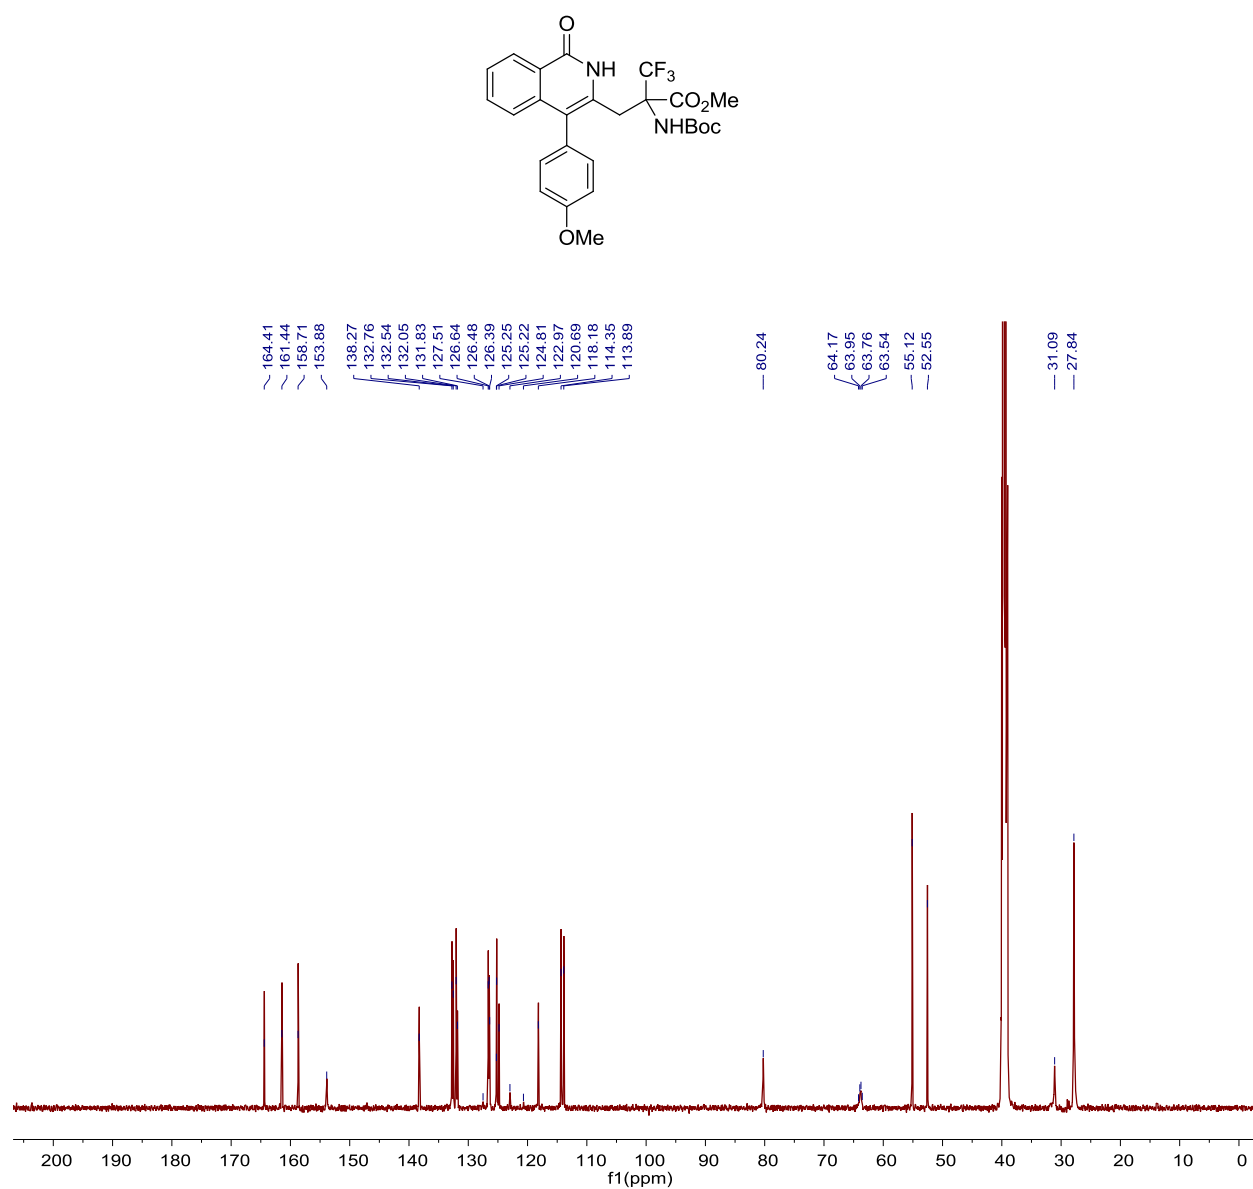

Figure S10.  $^{13}\text{C}$  spectrum of **3e** in DMSO- $d_6$

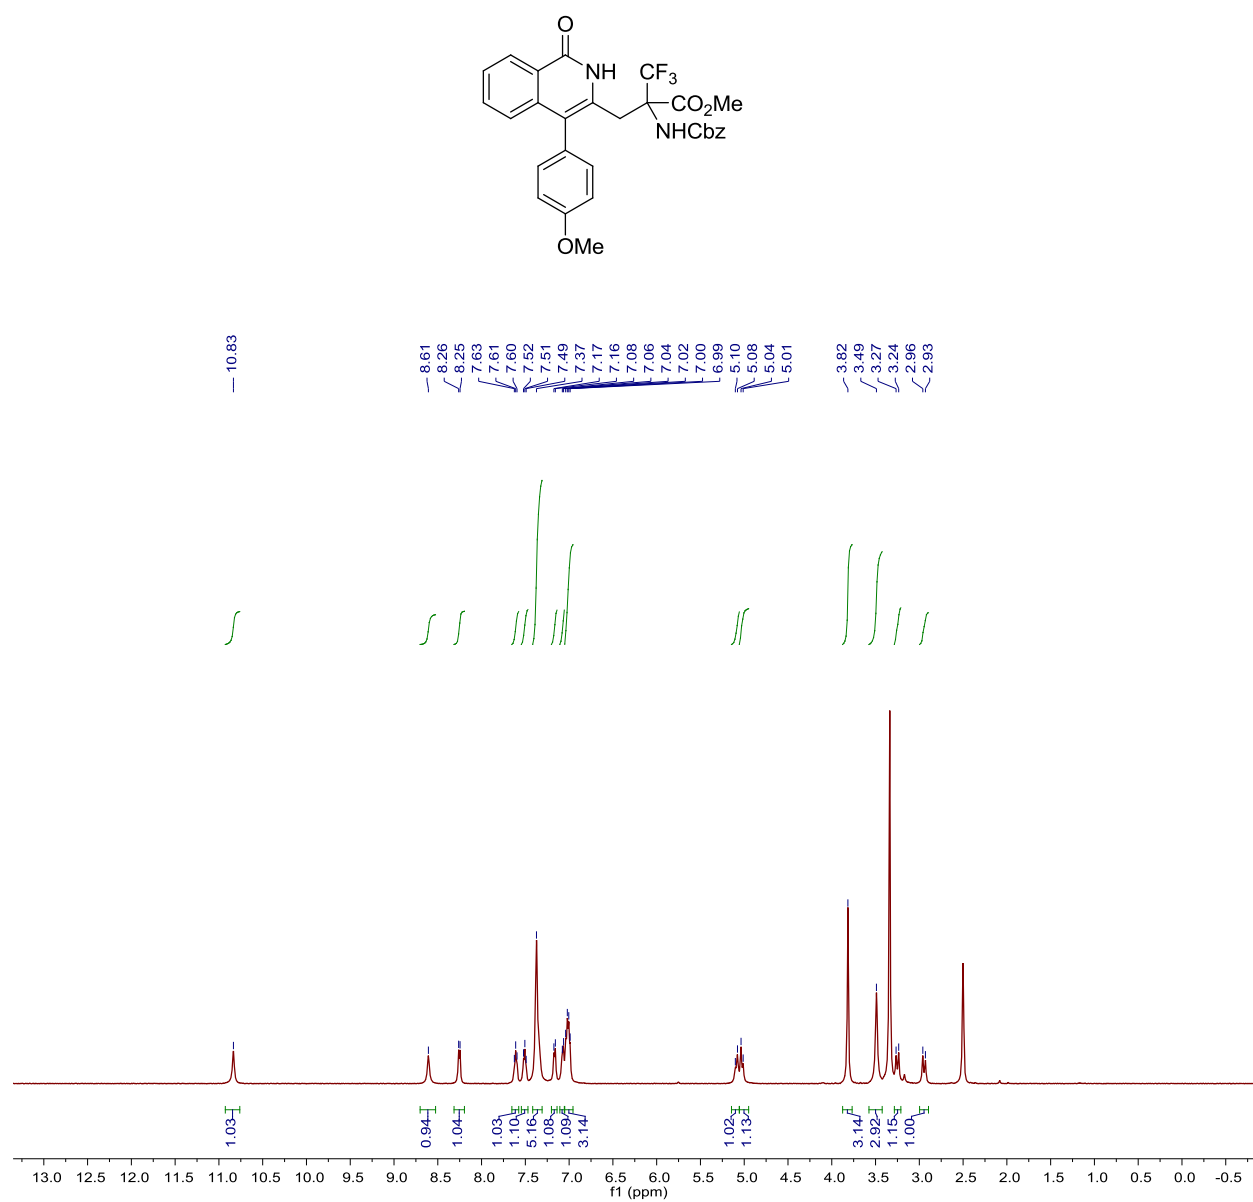

Figure S11.  $^1\text{H}$  spectrum of **3f** in DMSO- $d_6$

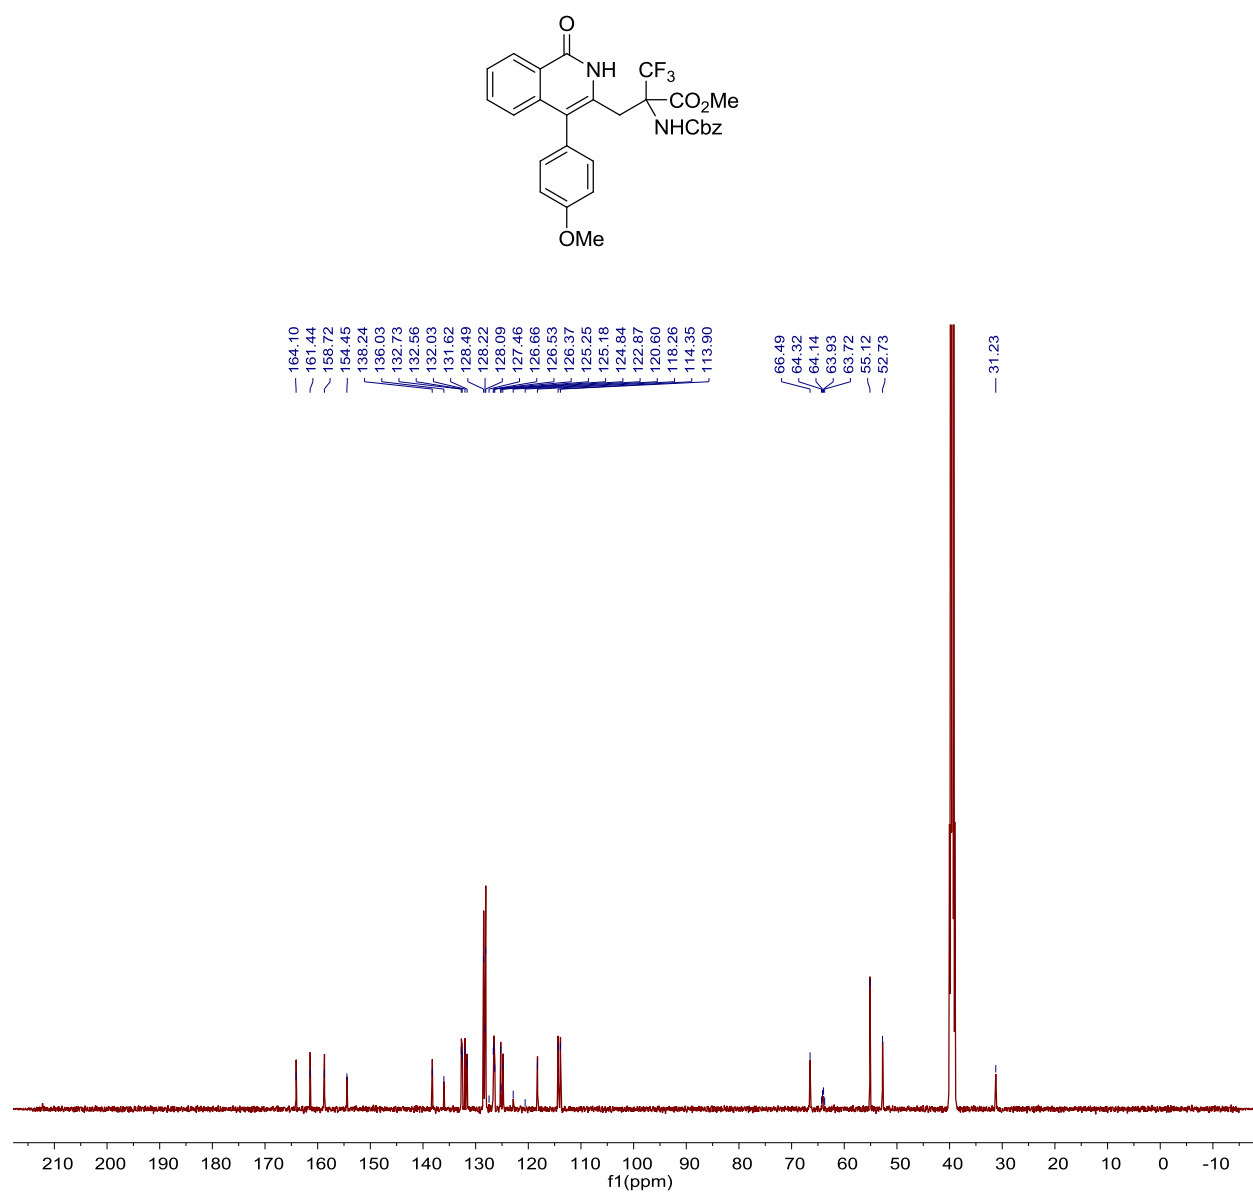

Figure S12.  $^{13}\text{C}$  spectrum of **3f** in  $\text{DMSO}-d_6$

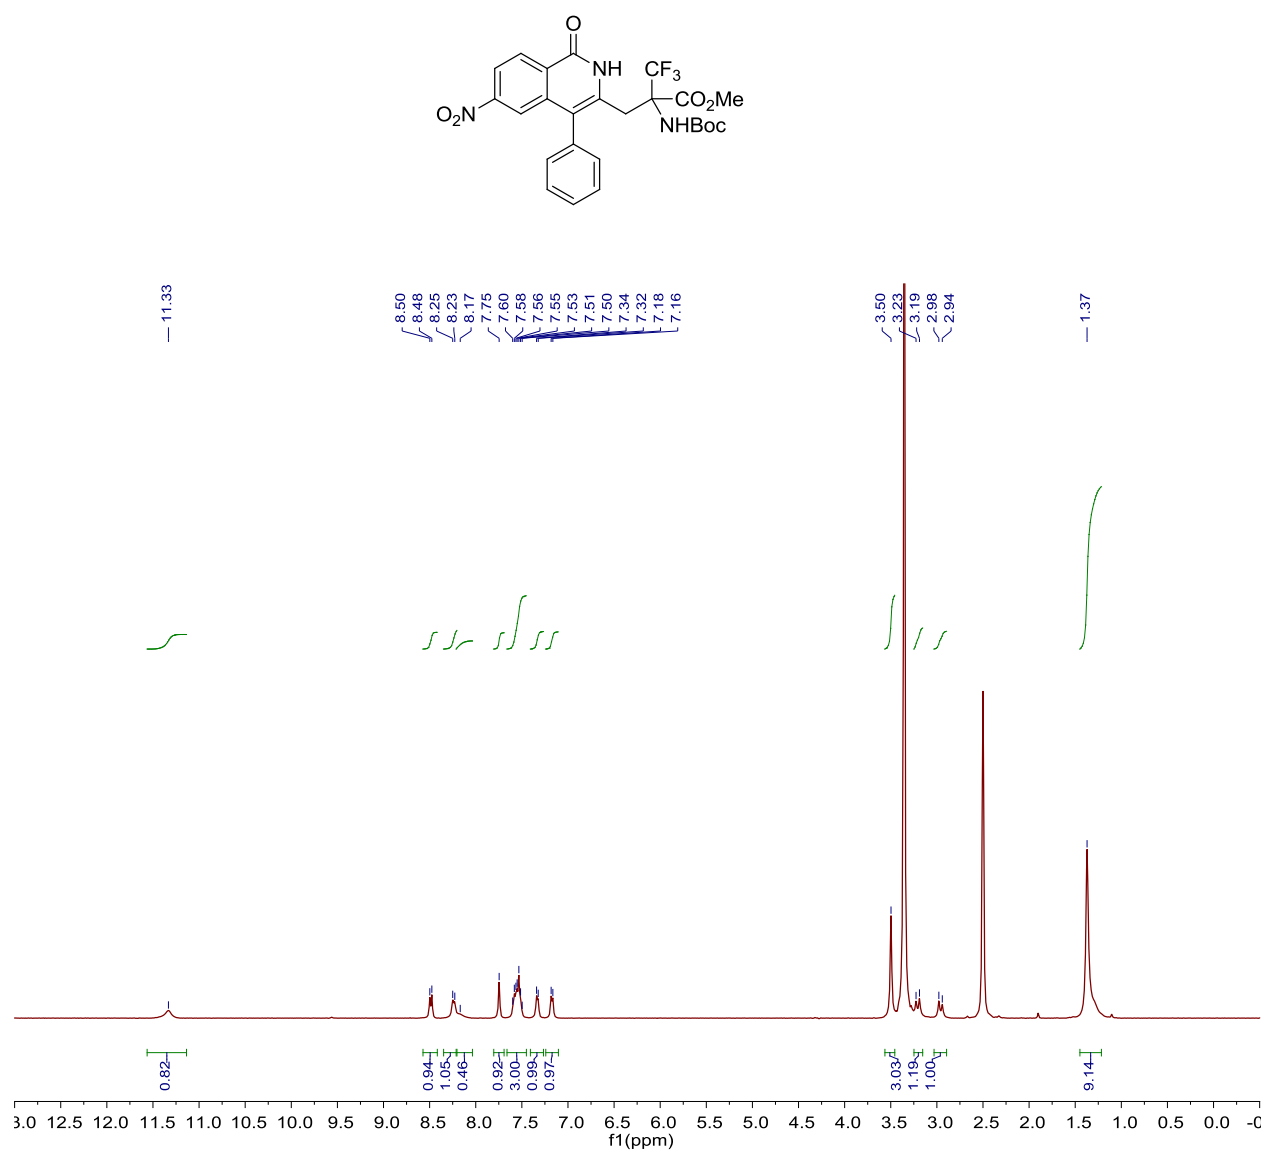

Figure S13.  $^1\text{H}$  spectrum of **3g** in DMSO- $d_6$

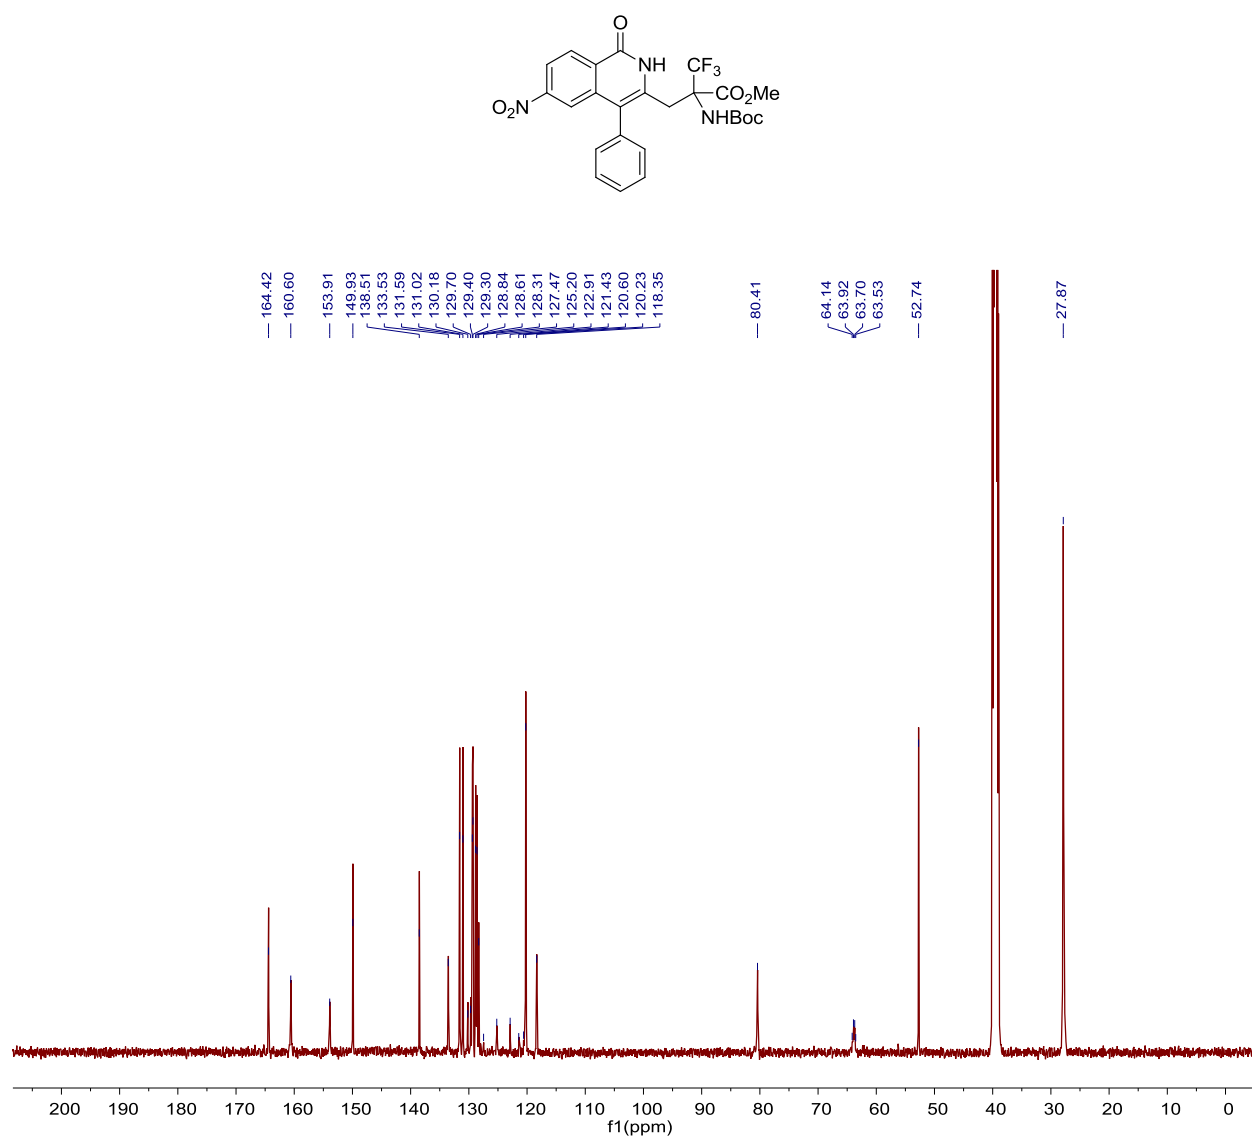

Figure S14.  $^{13}\text{C}$  spectrum of **3g** in DMSO- $d_6$

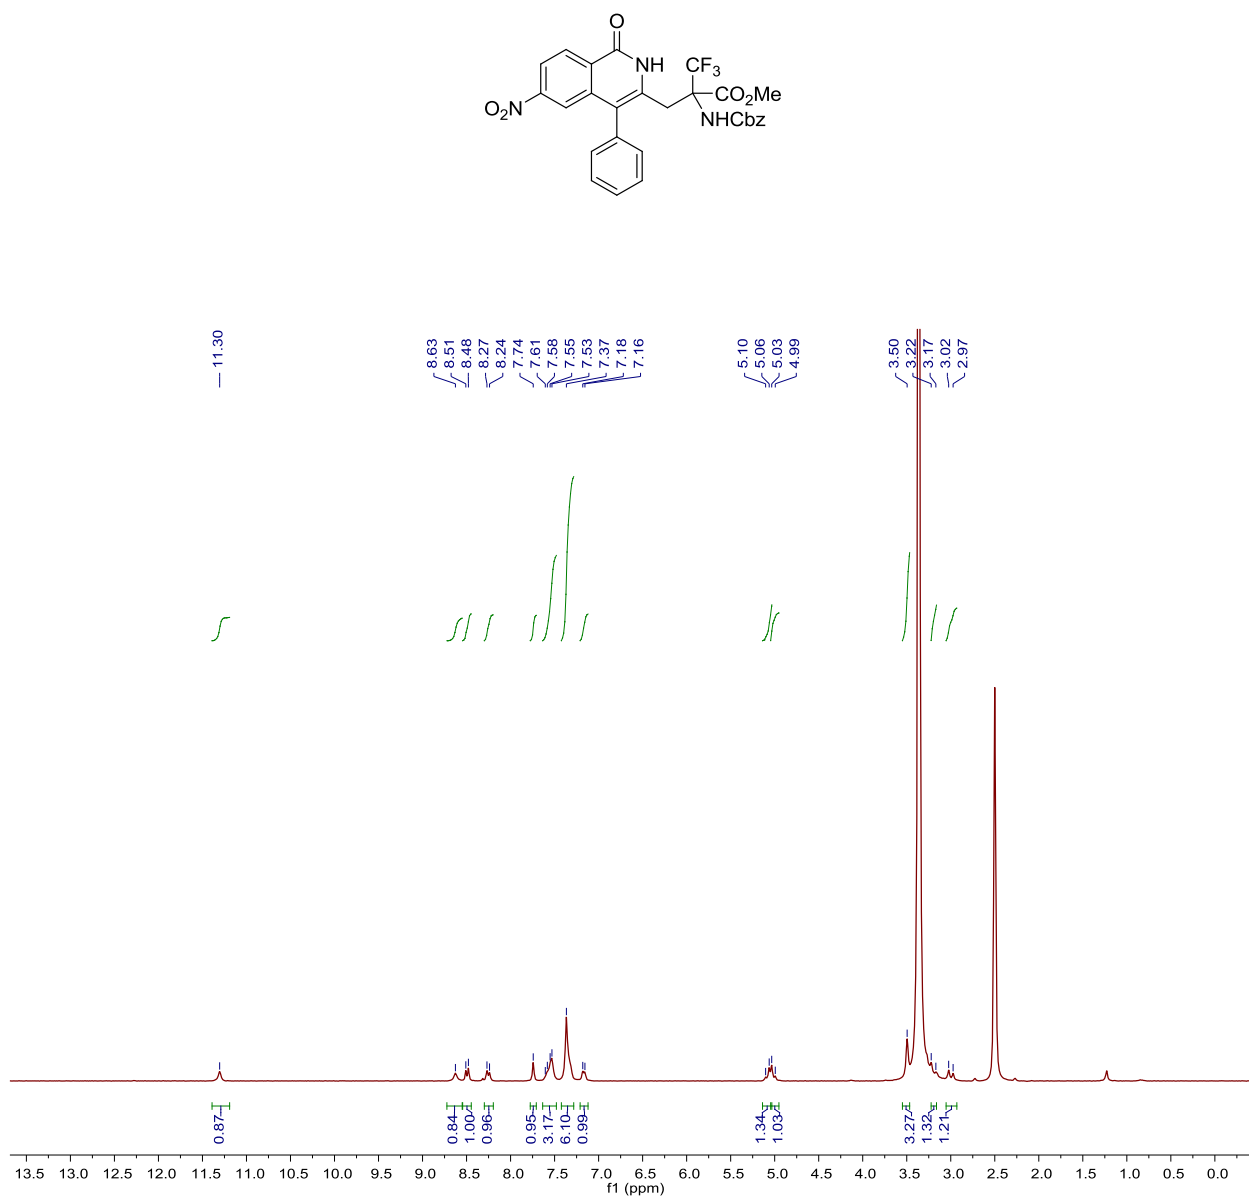

Figure S15.  $^1\text{H}$  spectrum of **3h** in DMSO- $d_6$



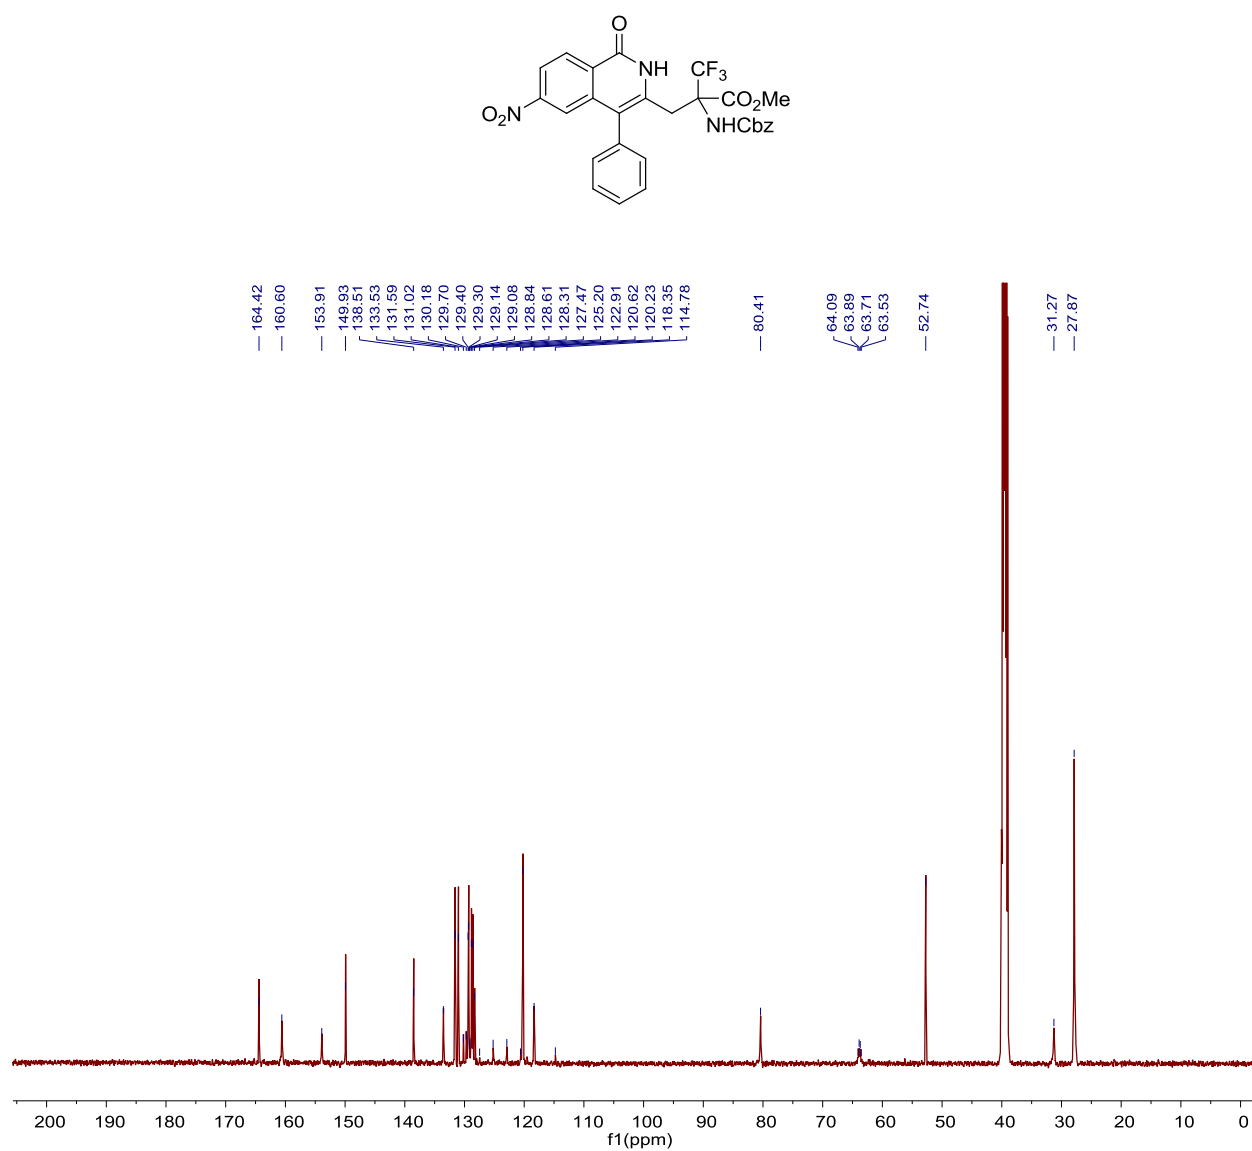

Figure S16.  $^{13}\text{C}$  spectrum of **3h** in  $\text{DMSO}-d_6$

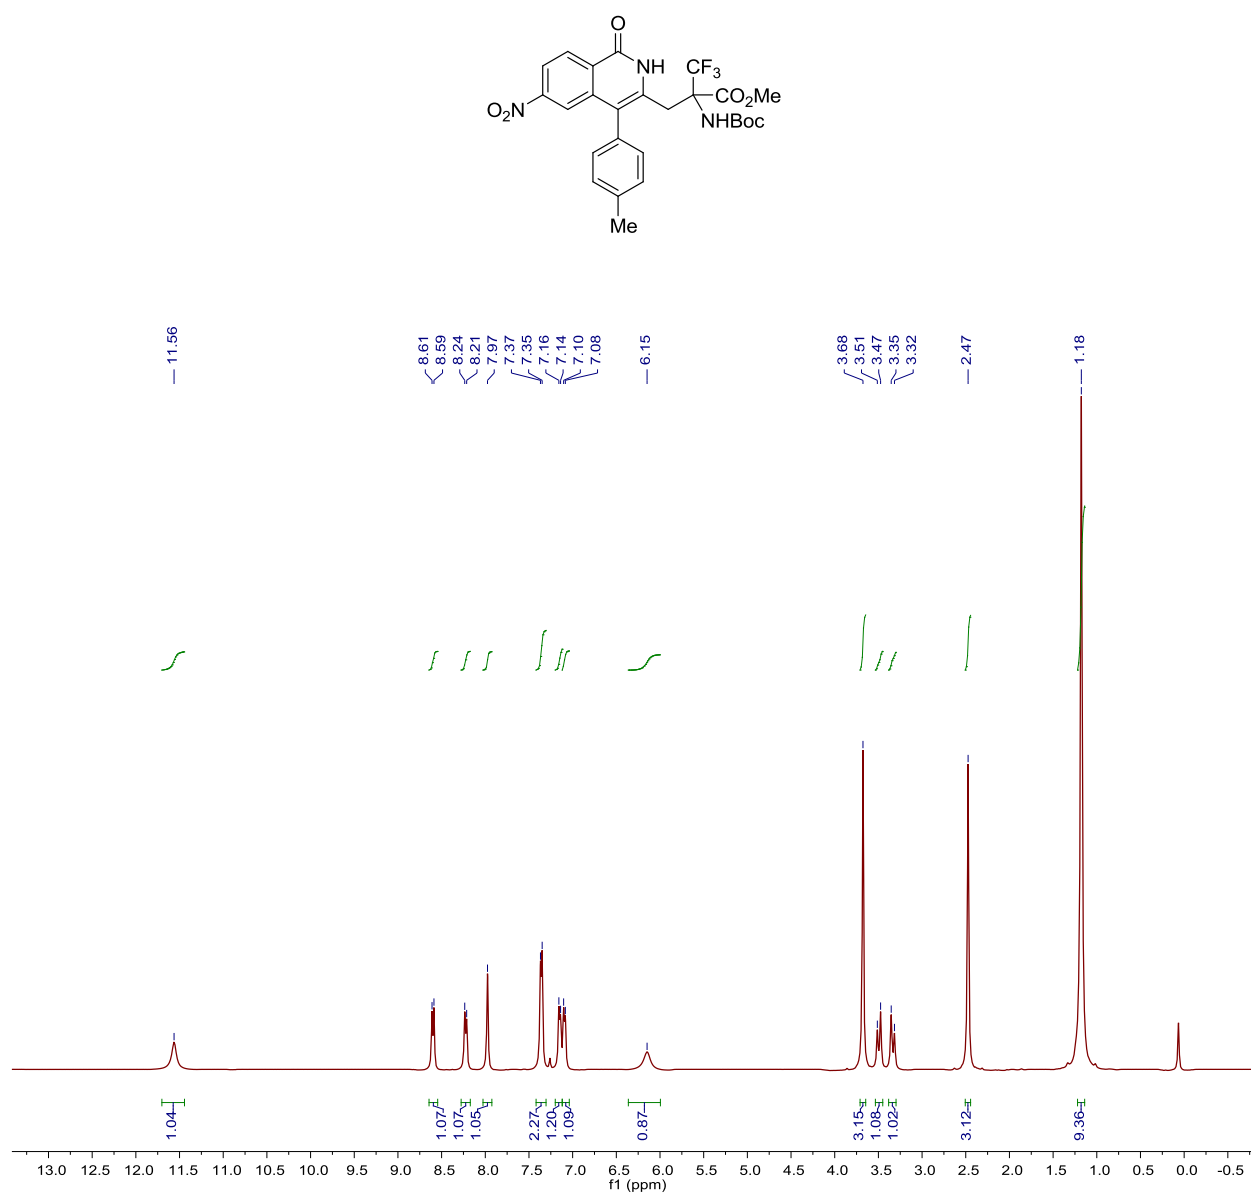

Figure S17.  $^1\text{H}$  spectrum of **3i** in CDCl<sub>3</sub>

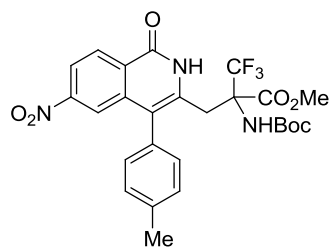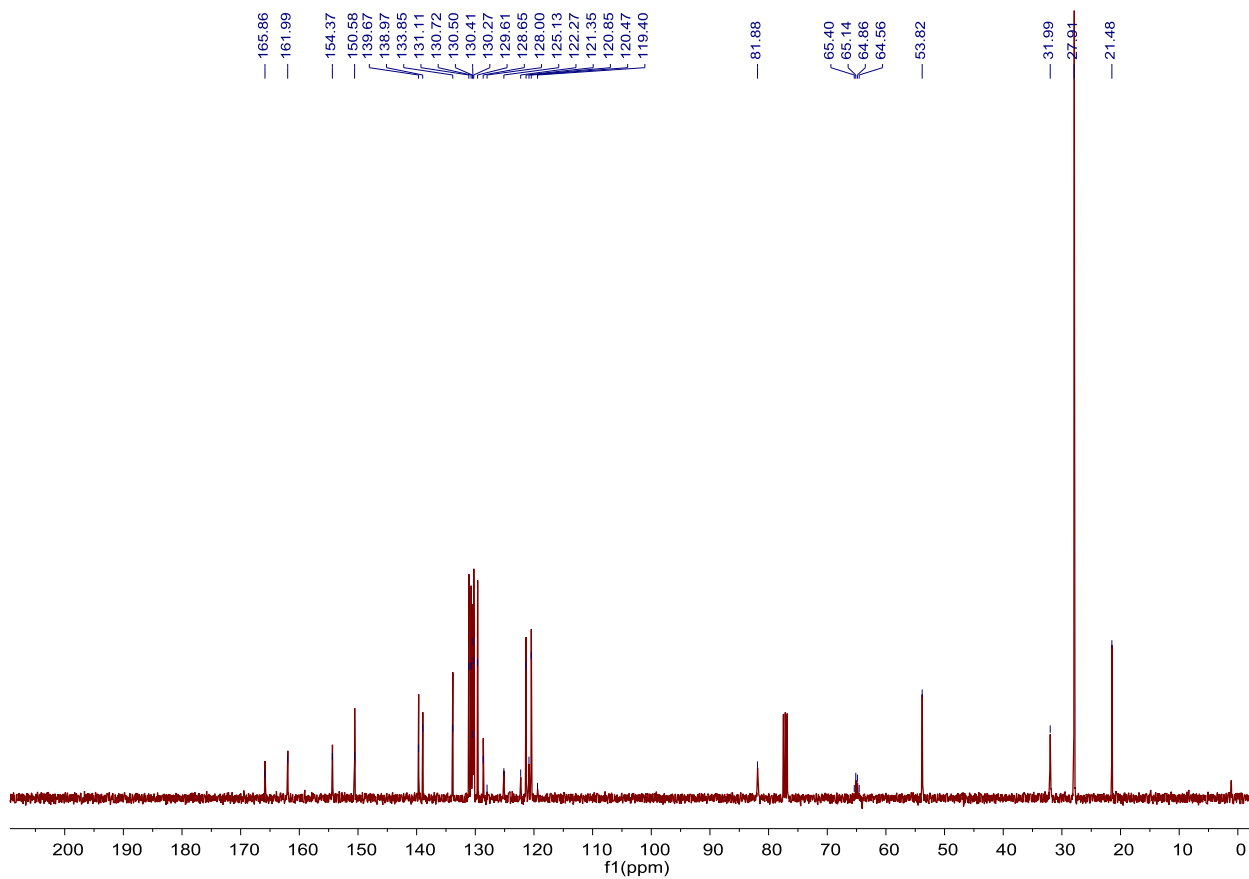

Figure S18.  $^{13}\text{C}$  spectrum of **3i** in  $\text{CDCl}_3$

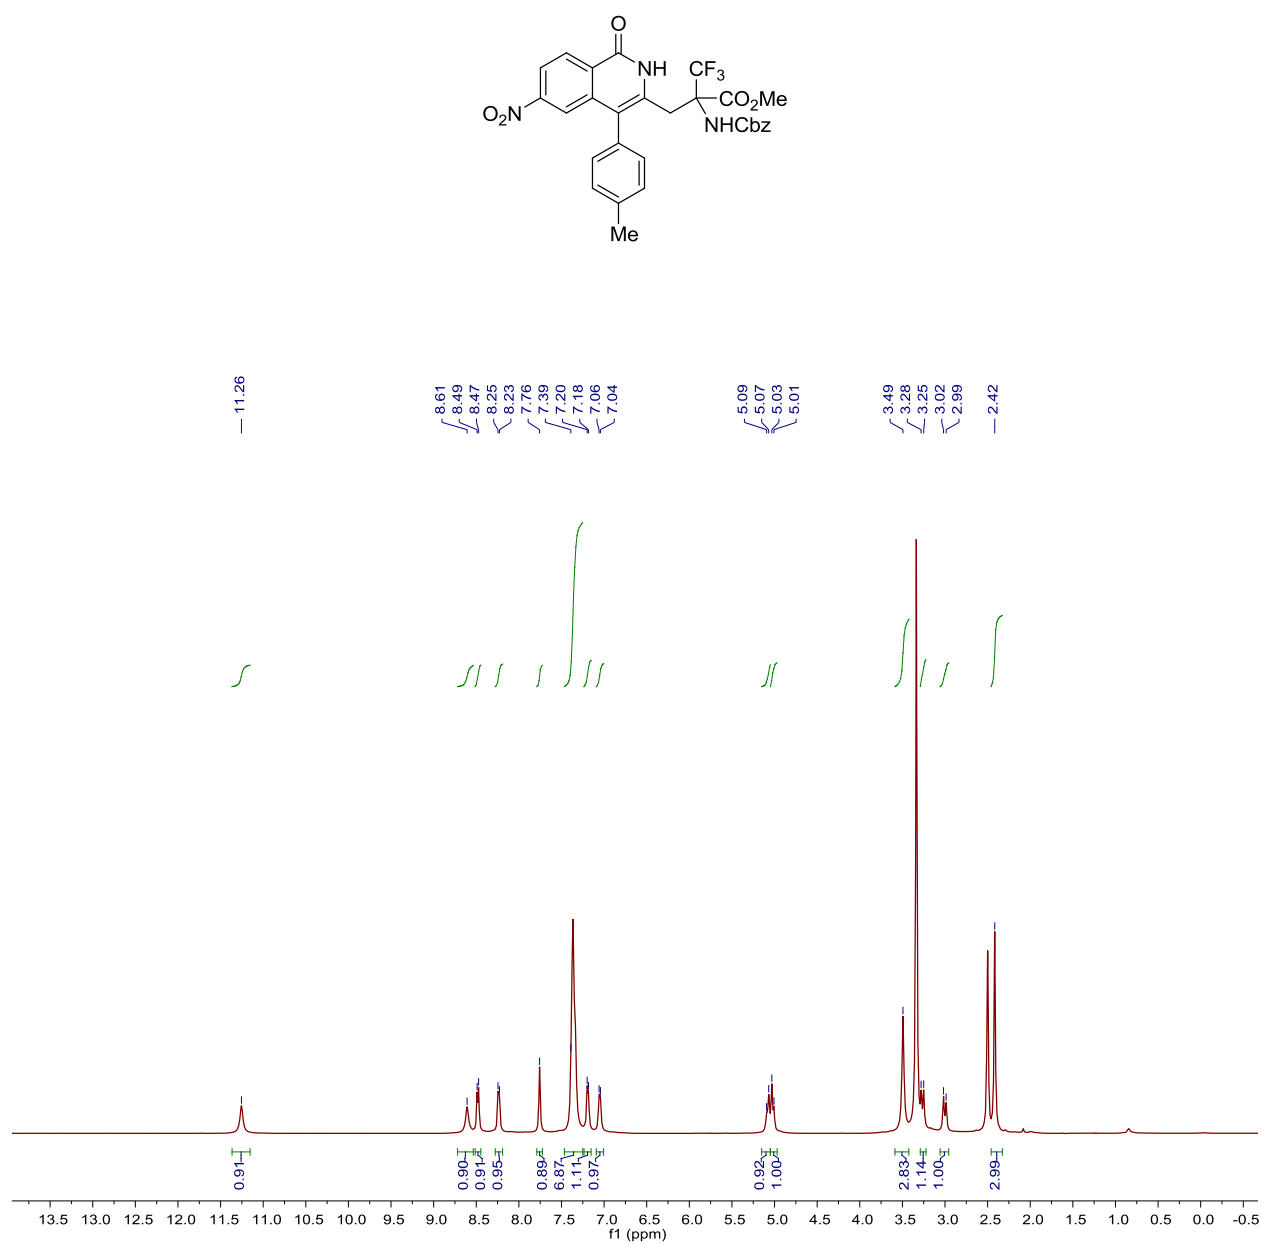

Figure S19.  $^1\text{H}$  spectrum of **3j** in DMSO- $d_6$

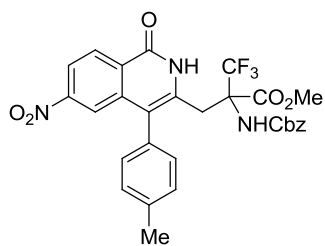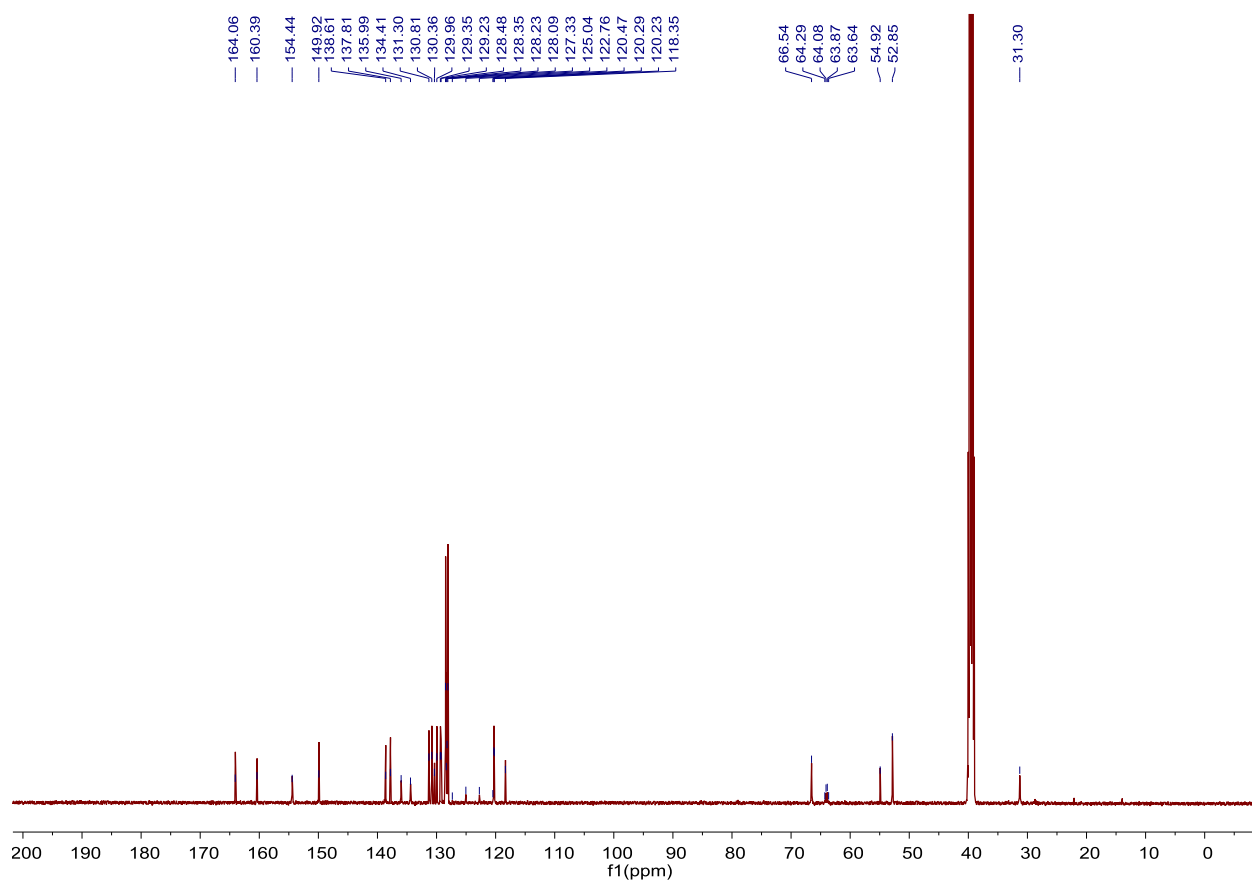

Figure S20.  $^{13}\text{C}$  spectrum of **3j** in  $\text{DMSO-}d_6$

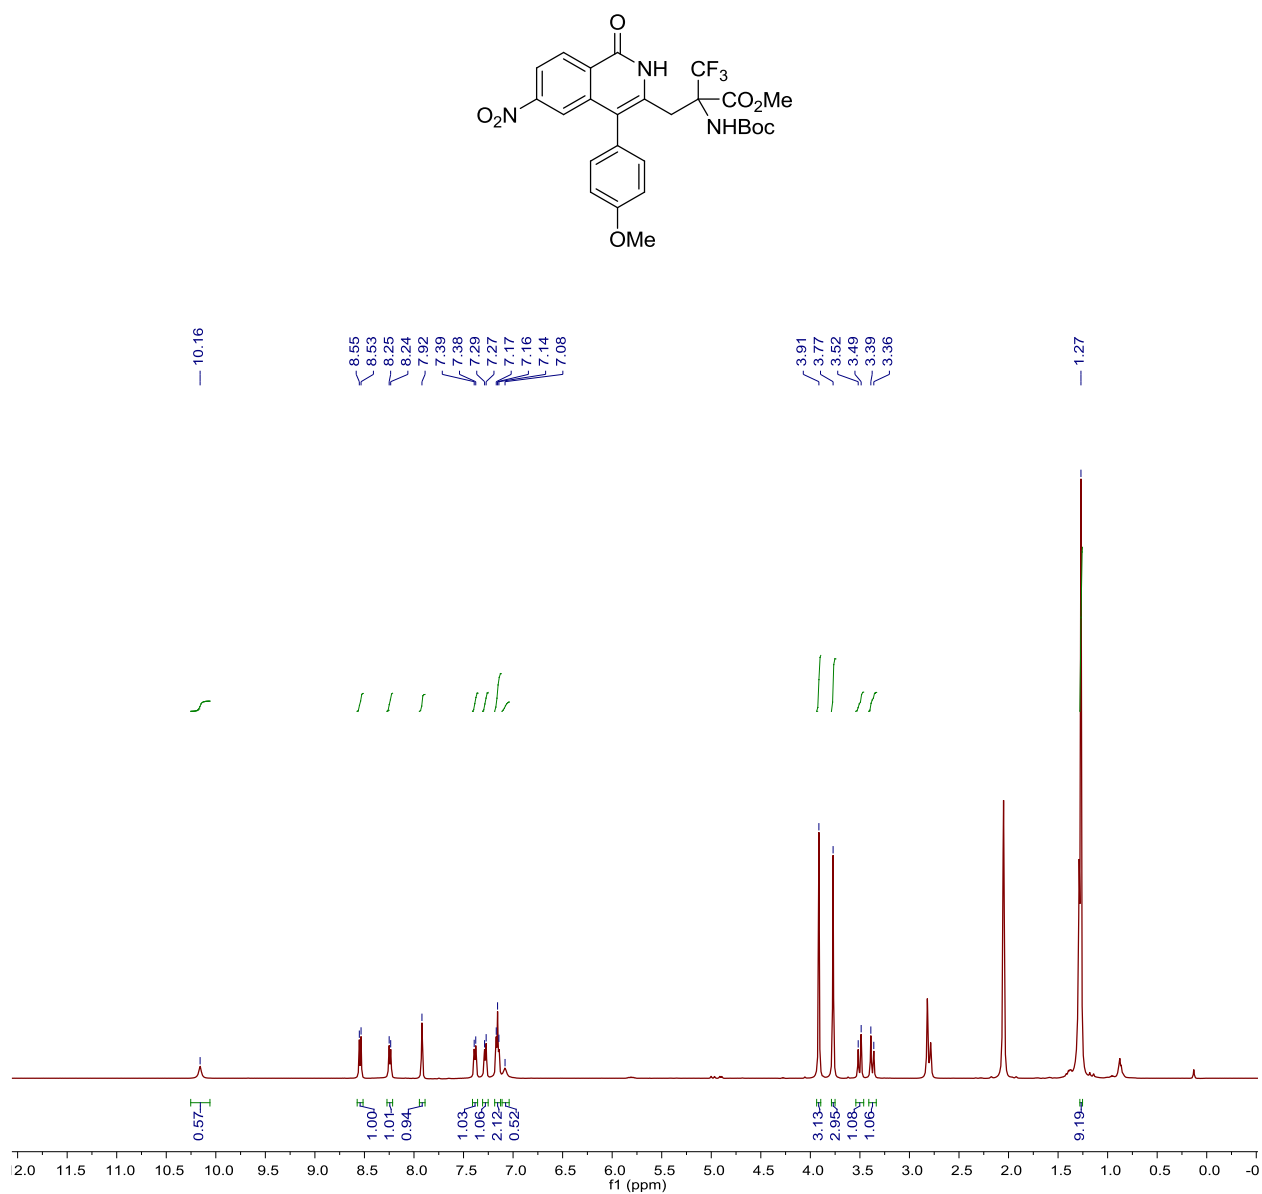

Figure S21.  $^1\text{H}$  spectrum of **3k** in  $\text{acetone-}d_6$

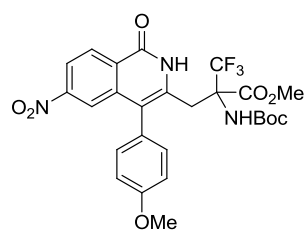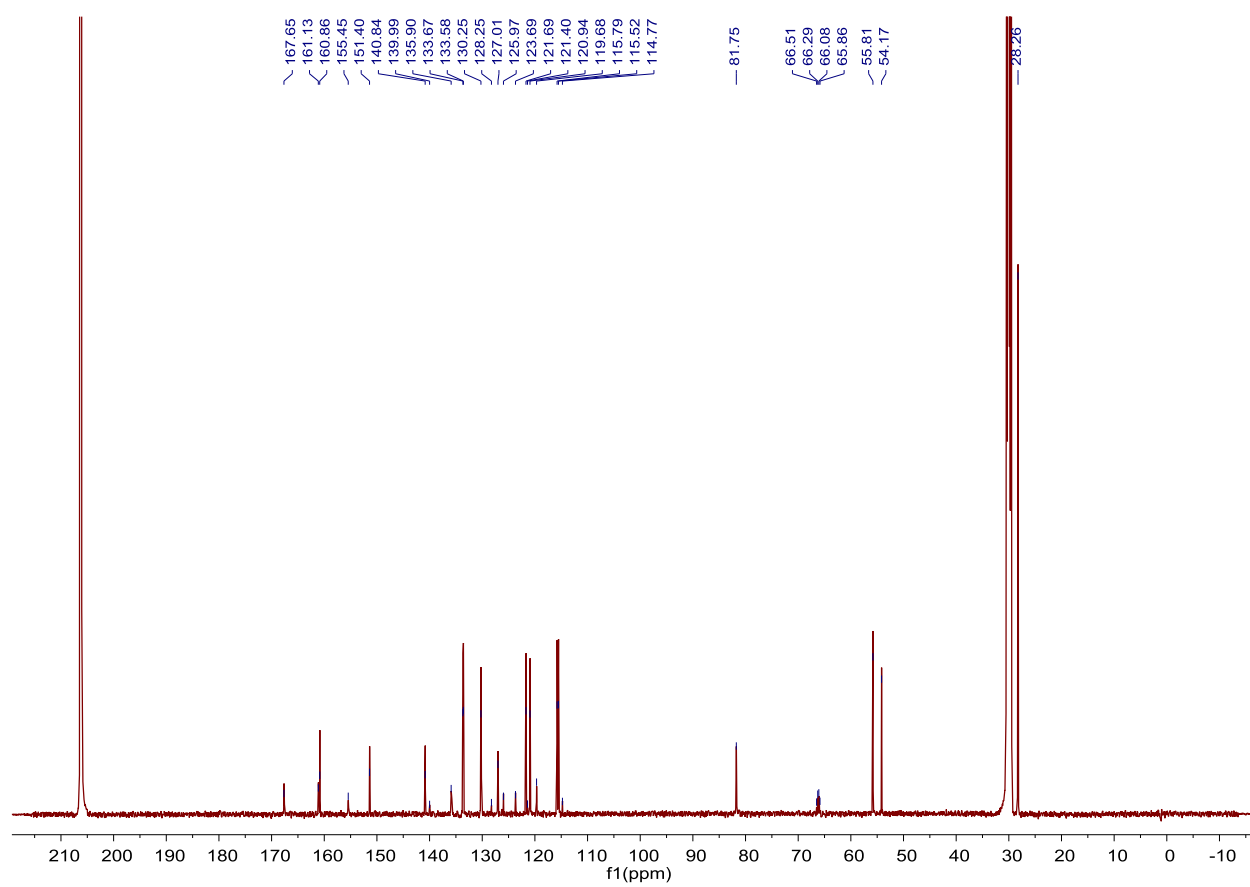

Figure S22.  $^{13}\text{C}$  spectrum of **3k** in acetone- $d_6$

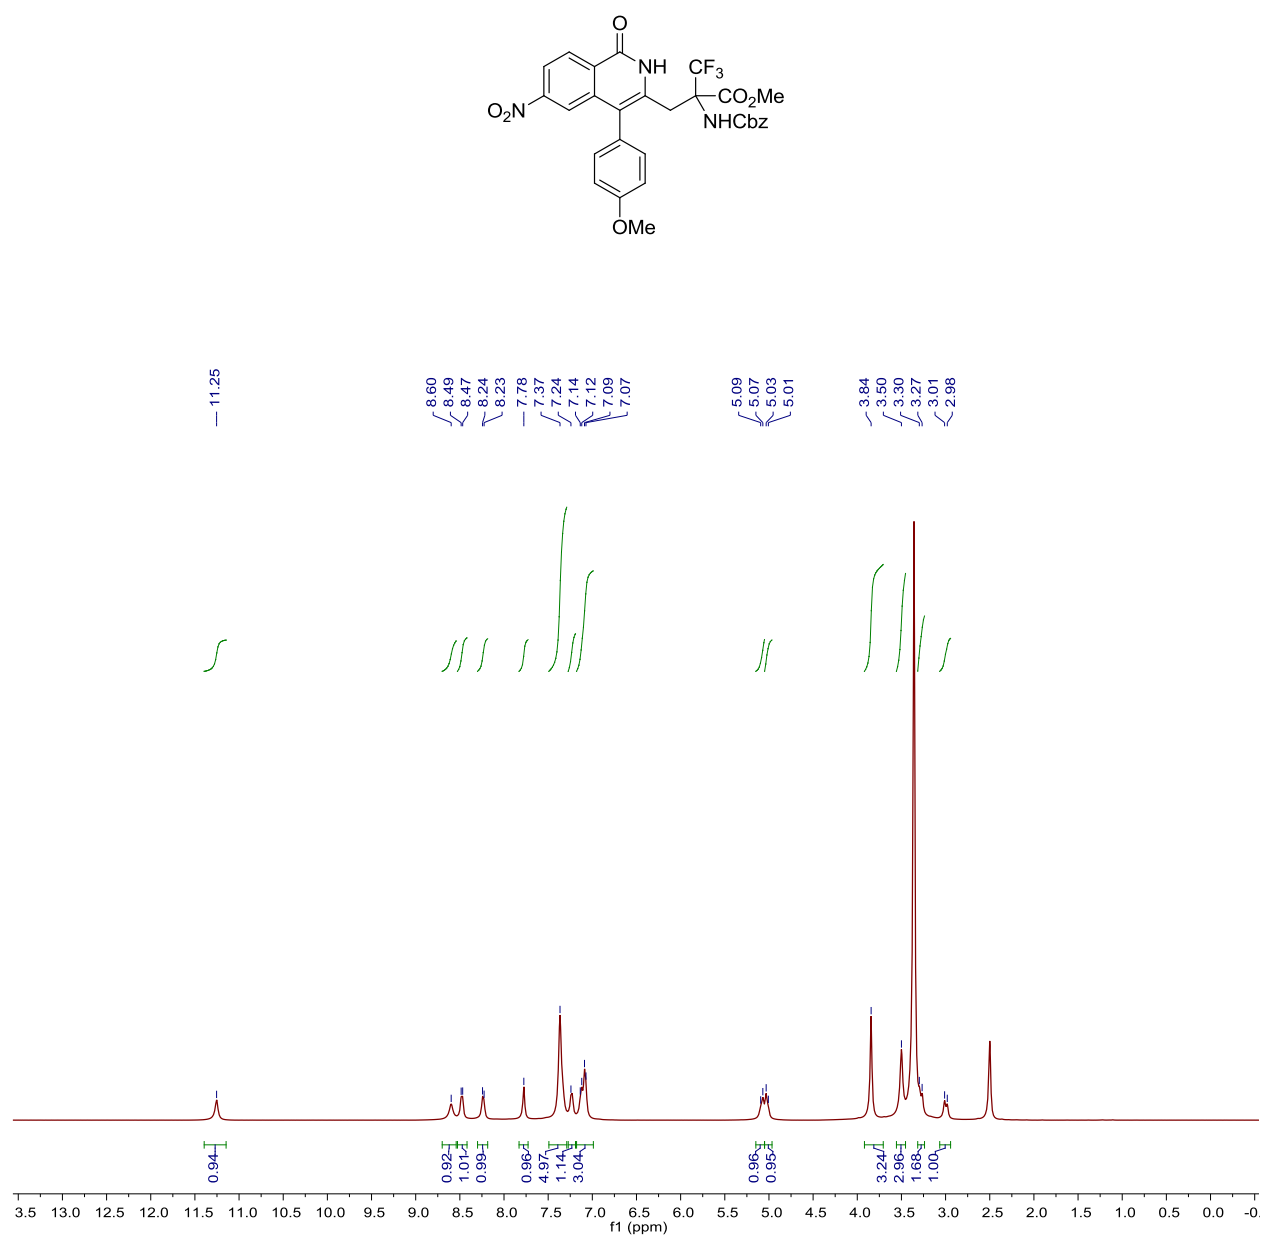

Figure S23.  $^1\text{H}$  spectrum of **31** in DMSO- $d_6$



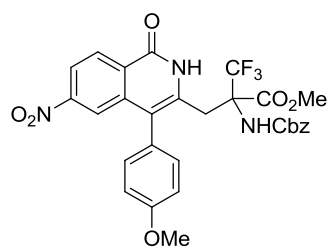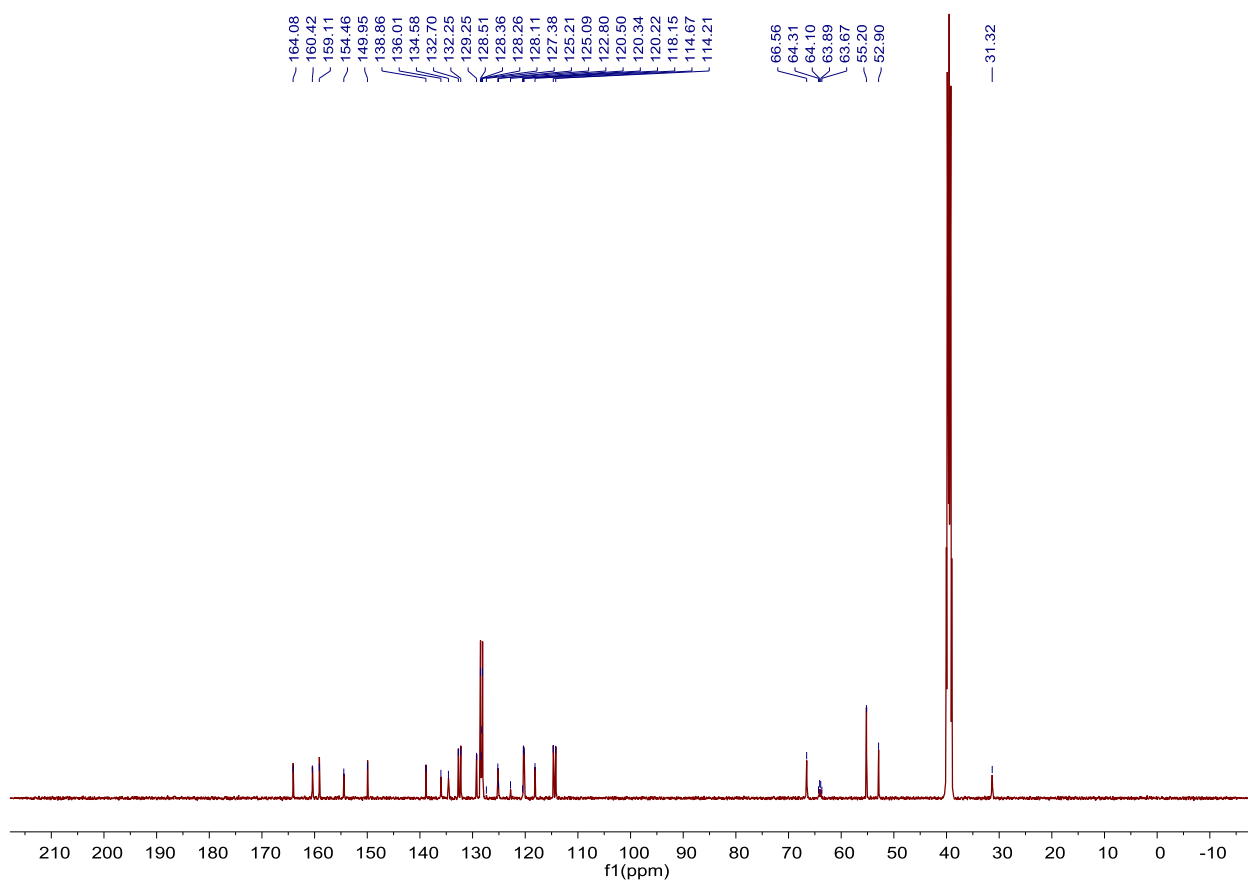

Figure S24.  $^{13}\text{C}$  spectrum of **31** in  $\text{DMSO-}d_6$

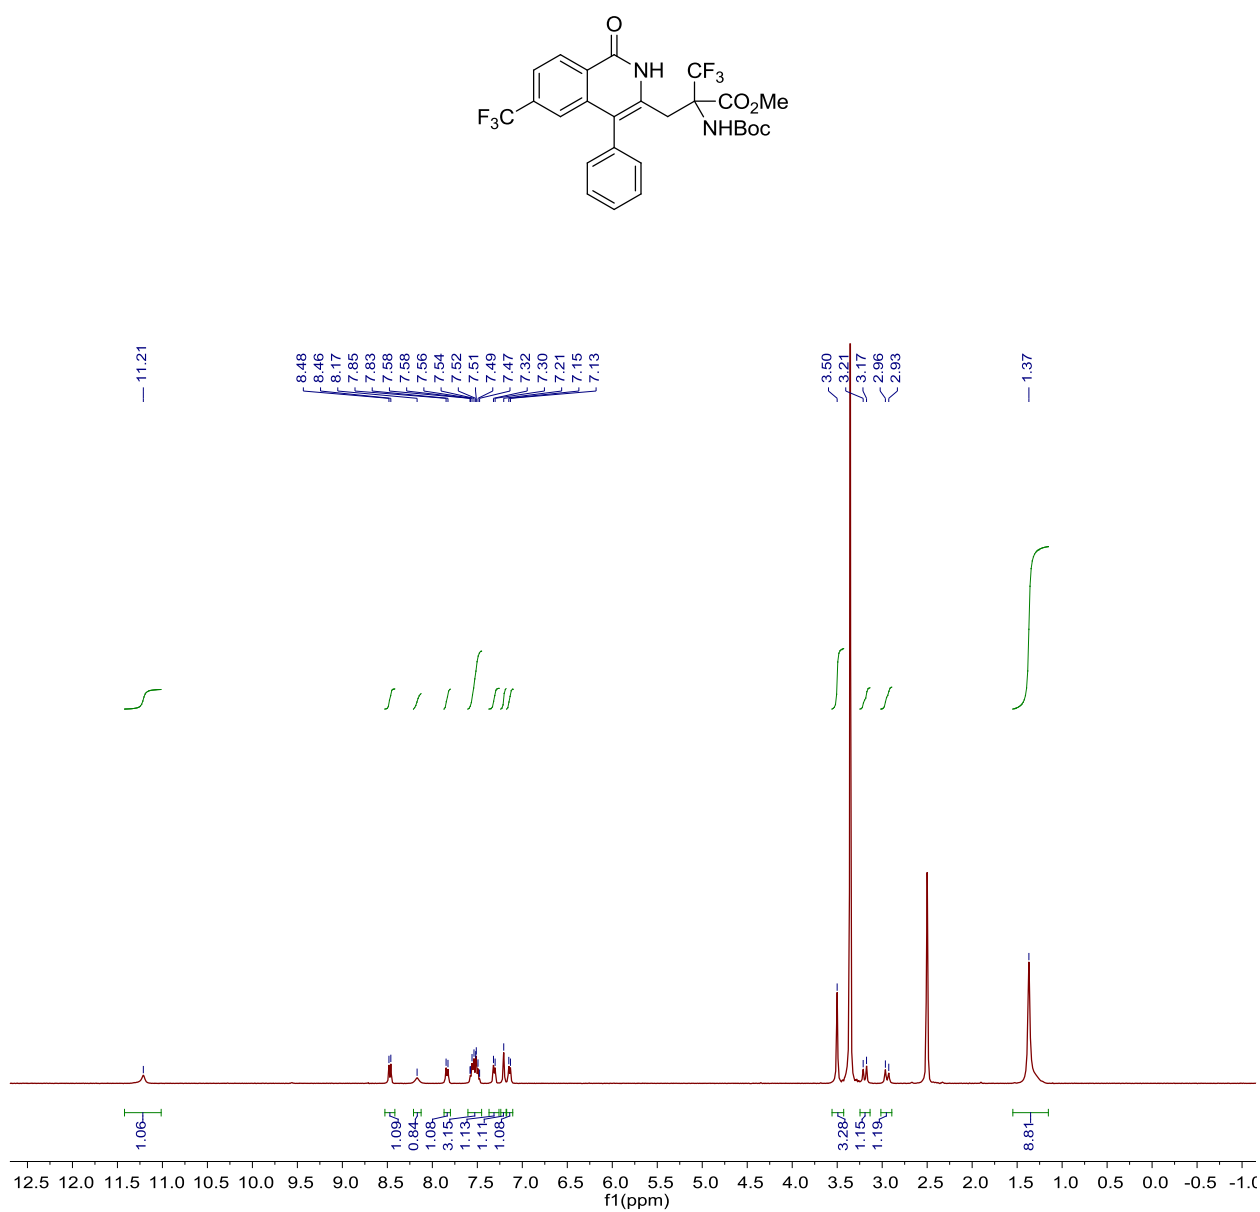

Figure S25.  $^1\text{H}$  spectrum of **3m** in DMSO- $d_6$

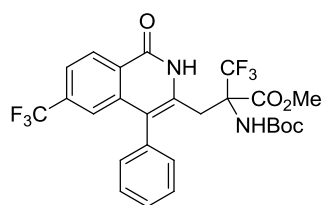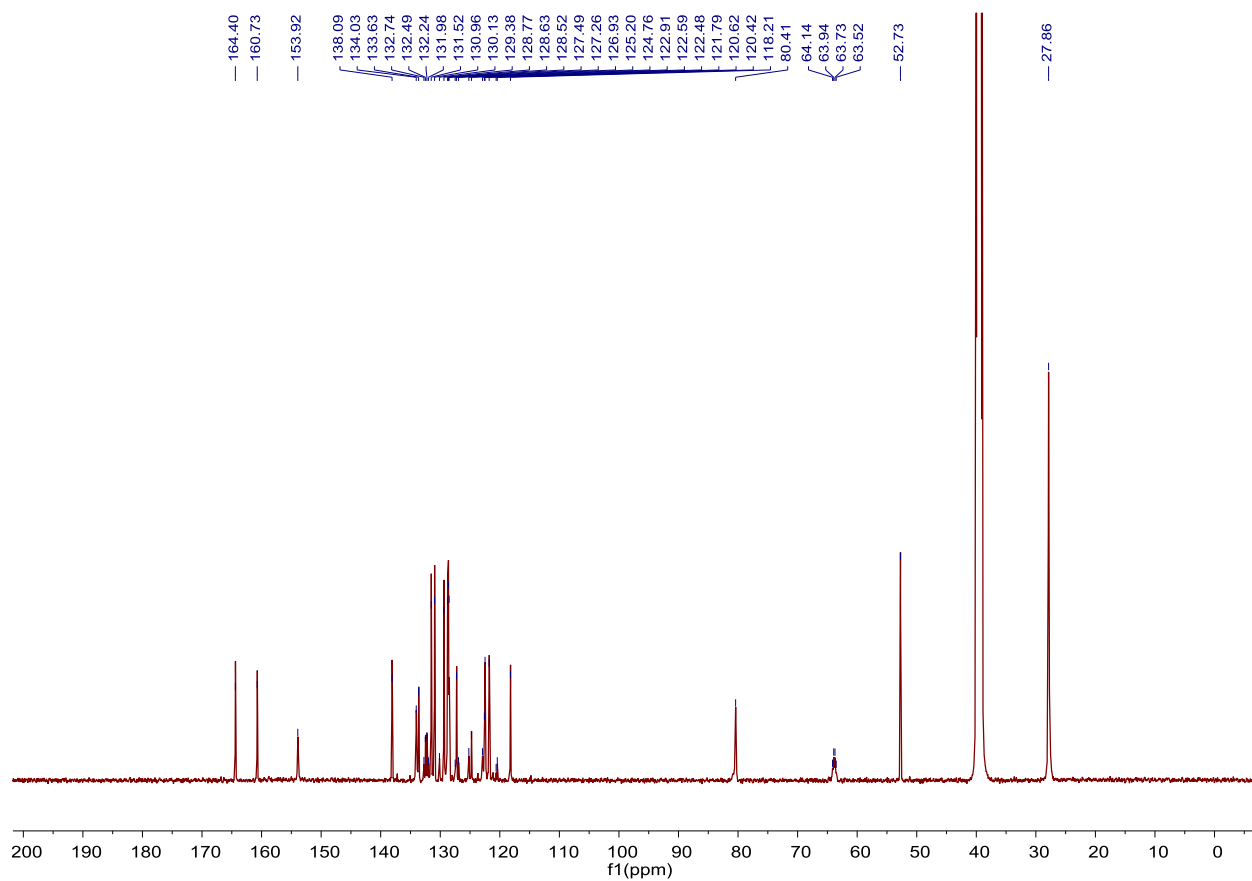

Figure S26.  $^{13}\text{C}$  spectrum of **3m** in  $\text{DMSO-}d_6$

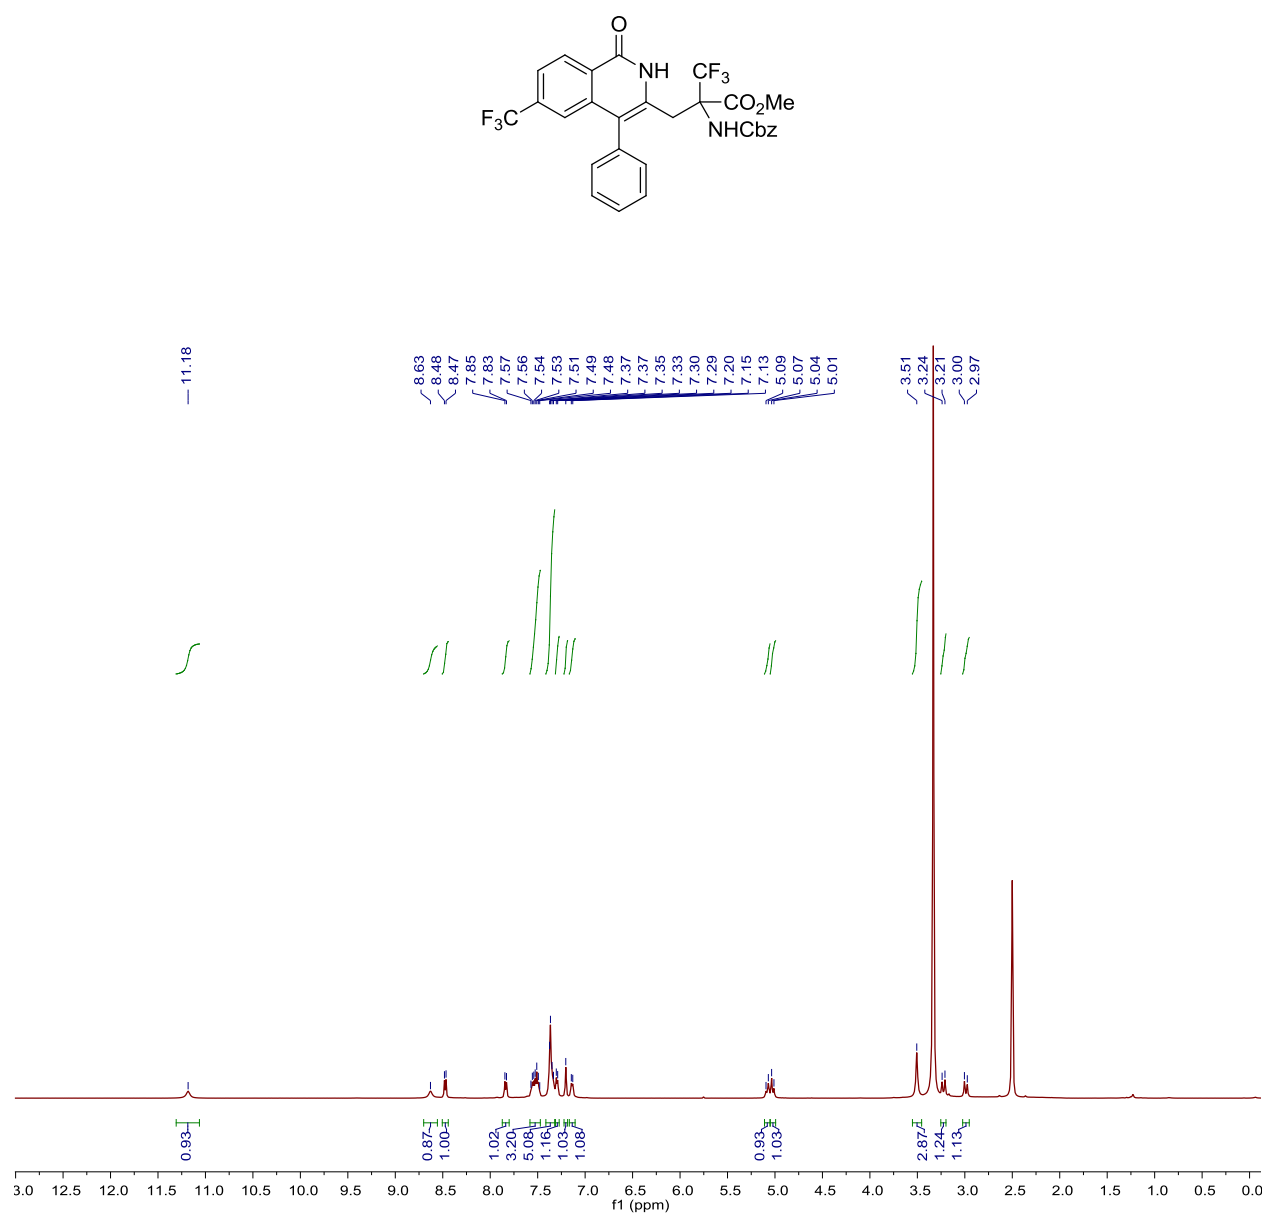

Figure S27. <sup>1</sup>H spectrum of **3n** in DMSO-*d*<sub>6</sub>

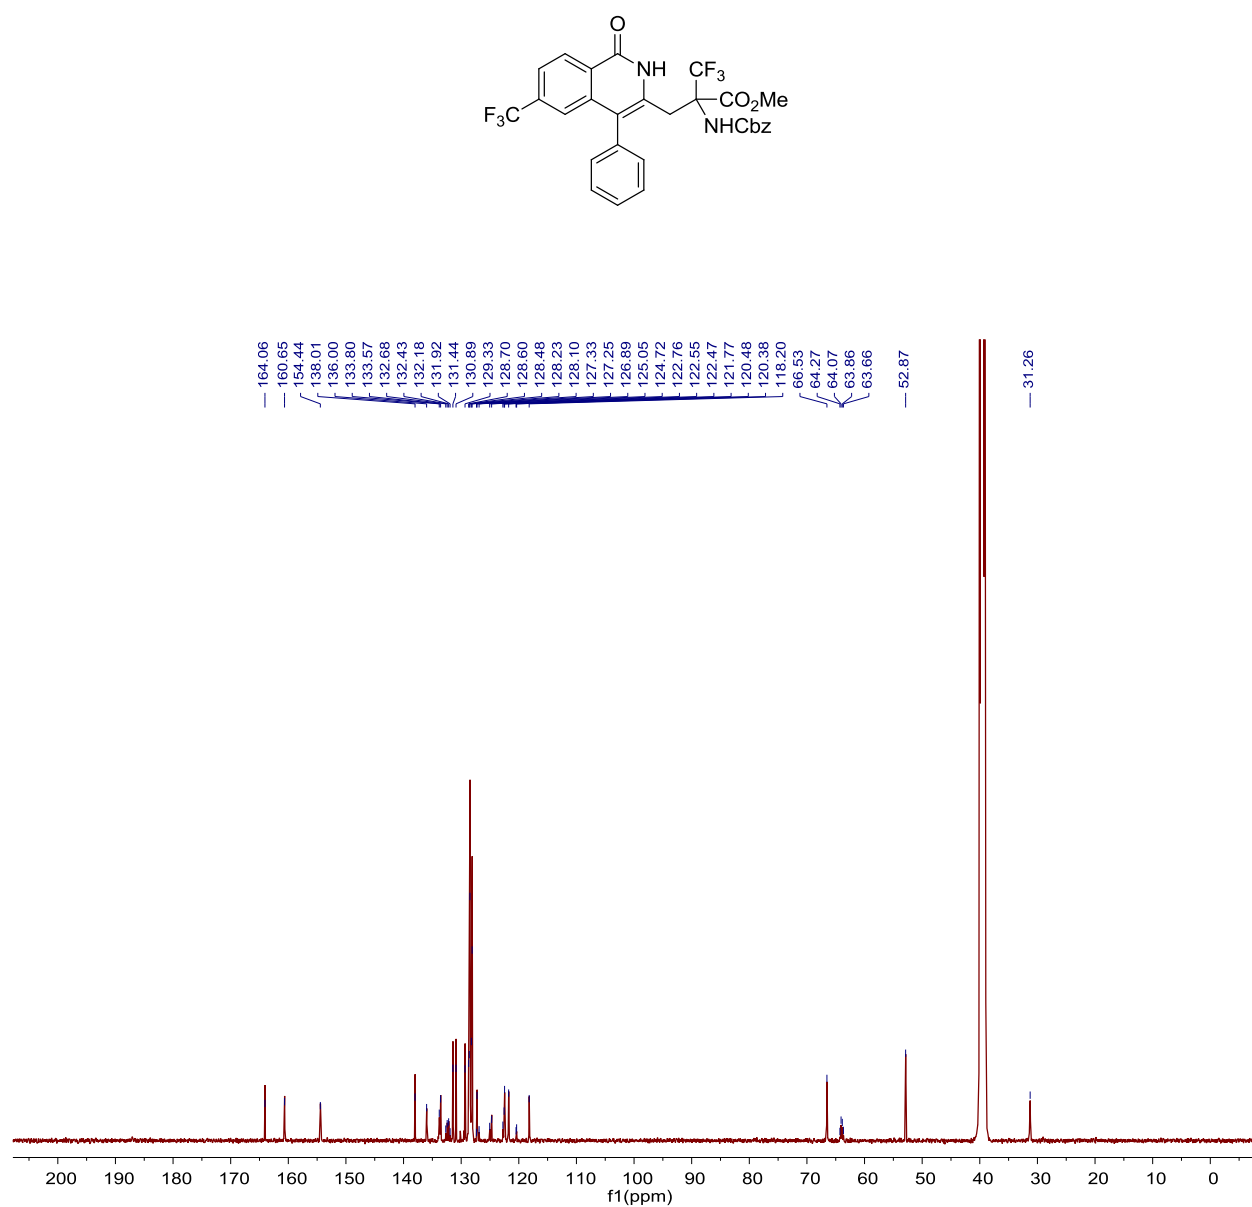

Figure S28.  $^{13}\text{C}$  spectrum of **3n** in  $\text{DMSO}-d_6$

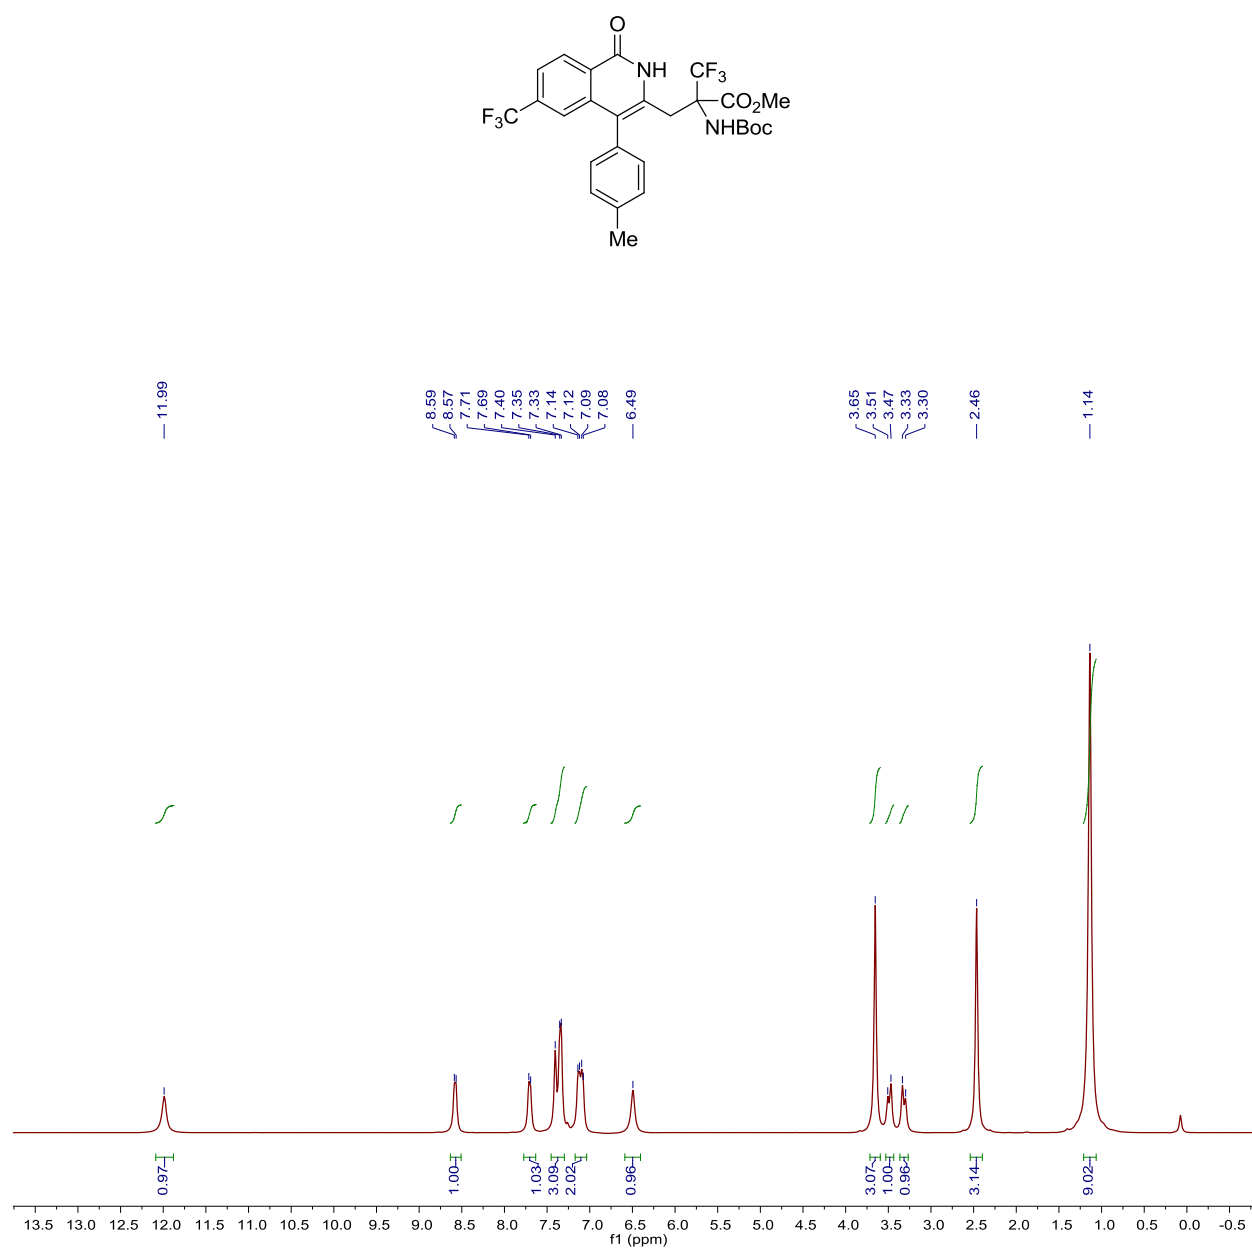

Figure S29.  $^1\text{H}$  spectrum of **3o** in  $\text{CDCl}_3$

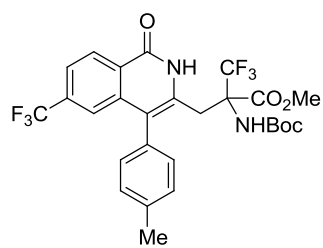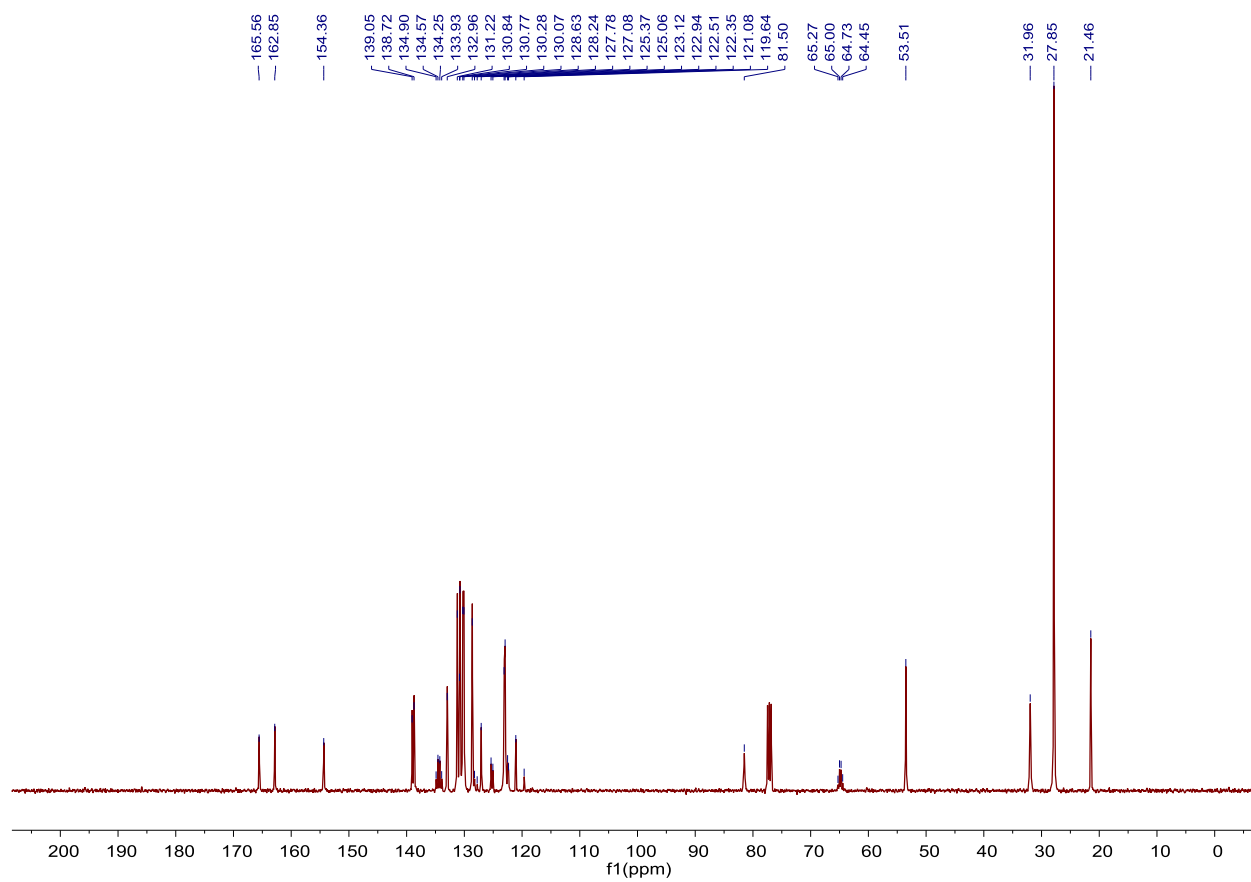

Figure S30.  $^{13}\text{C}$  spectrum of **3o** in  $\text{CDCl}_3$

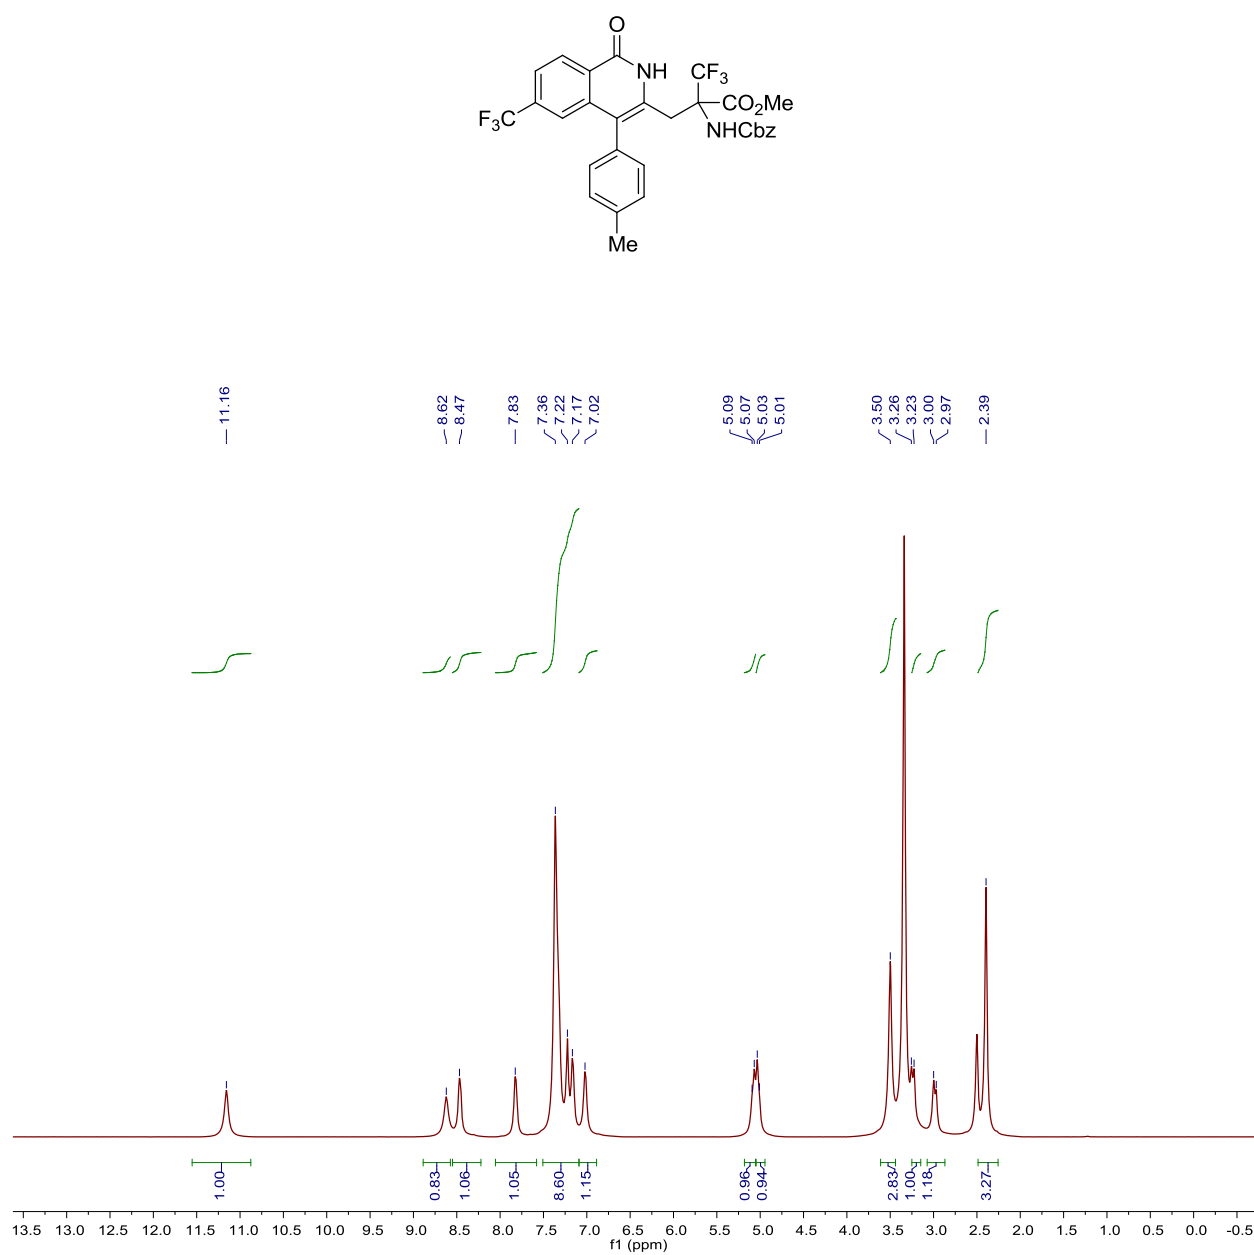

Figure S31. <sup>1</sup>H spectrum of **3p** in DMSO-*d*<sub>6</sub>



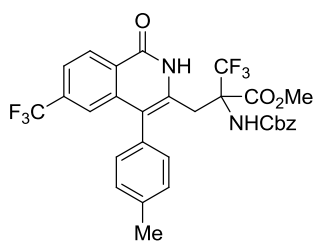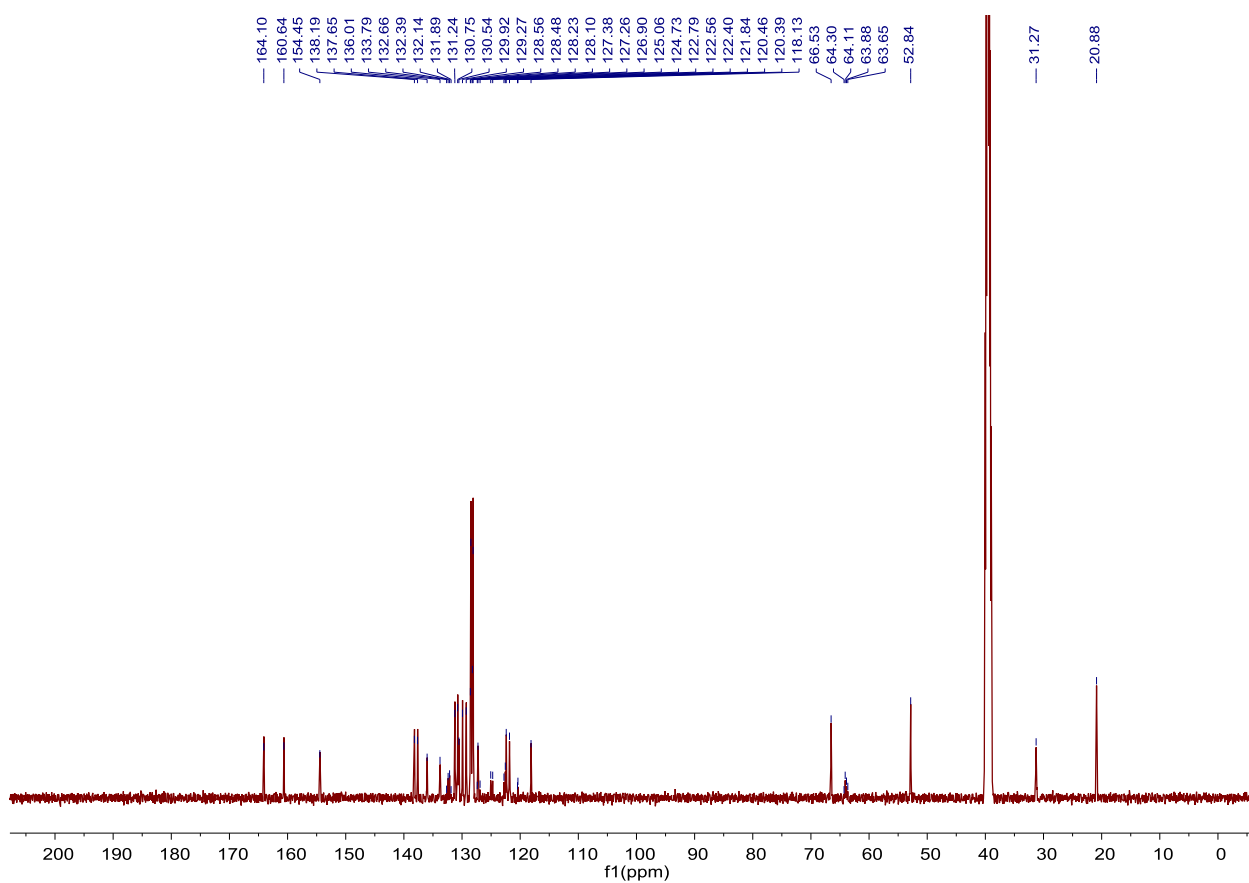

Figure S32.  $^{13}\text{C}$  spectrum of **3p** in  $\text{DMSO-}d_6$

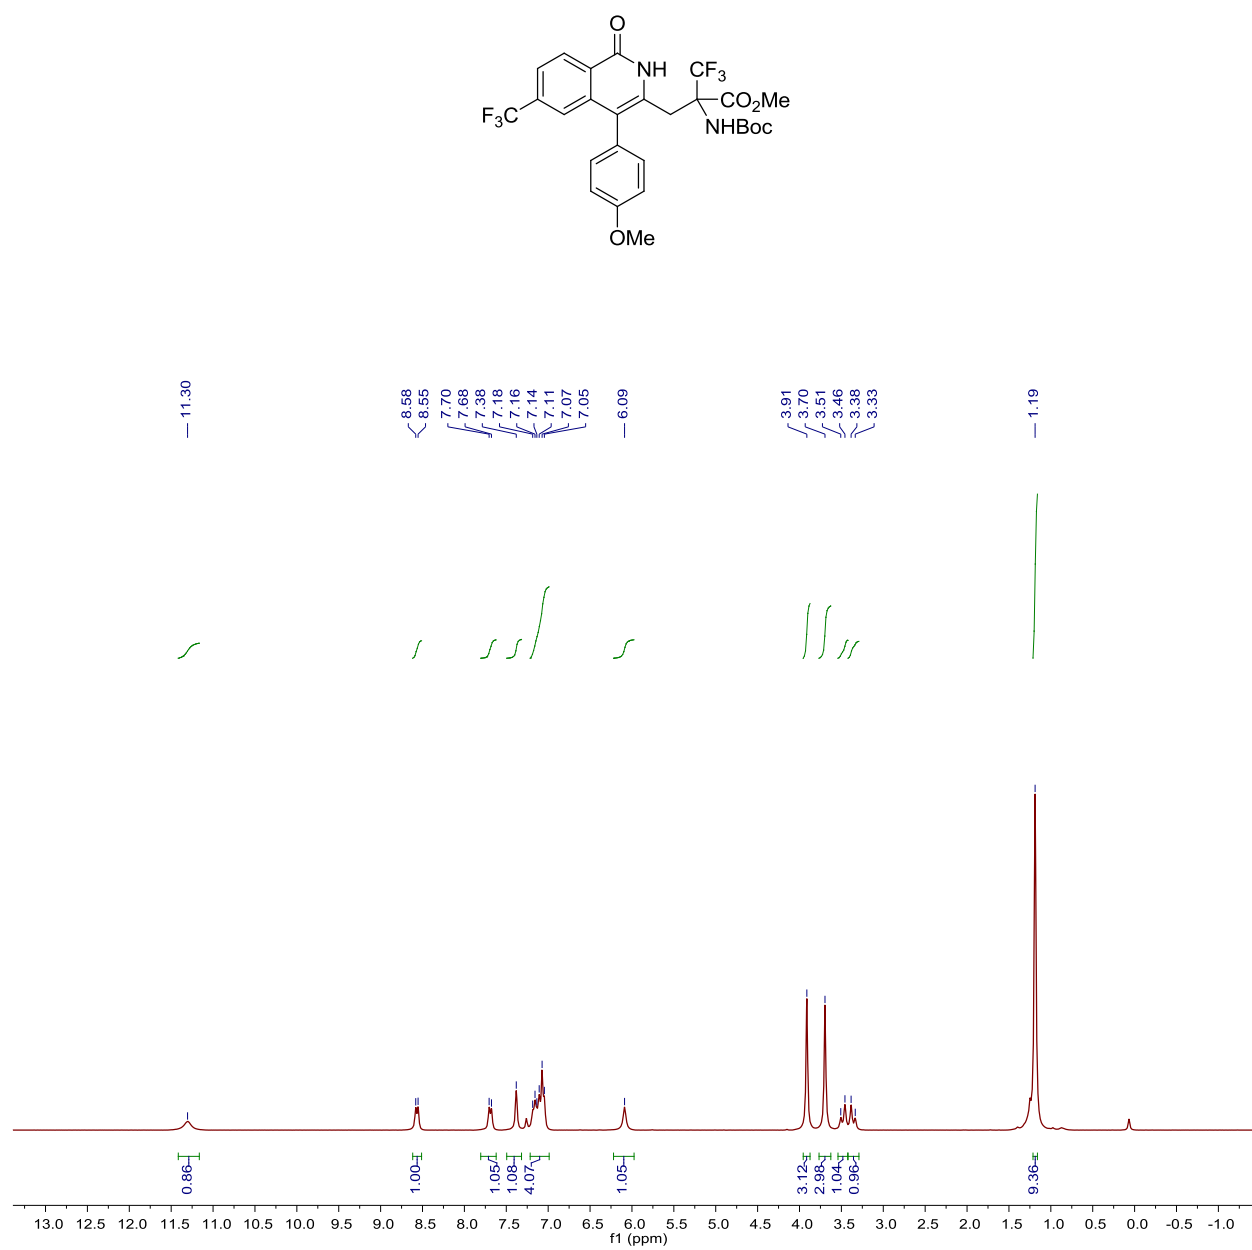

Figure S33.  $^1\text{H}$  spectrum of **3q** in  $\text{CDCl}_3$

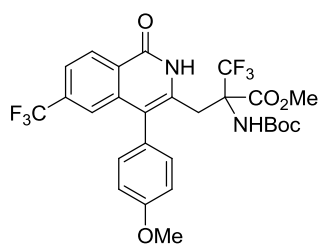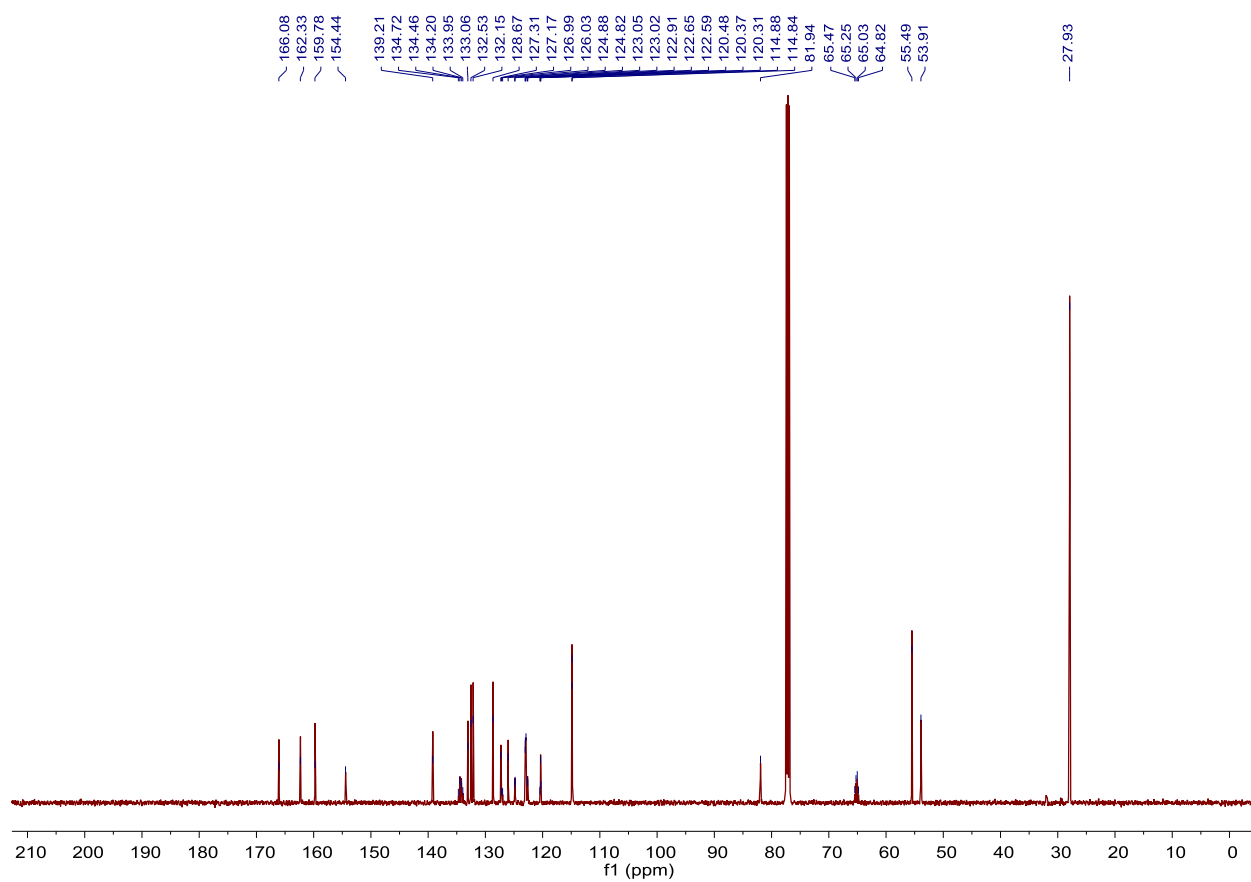

Figure S34.  $^{13}\text{C}$  spectrum of **3q** in  $\text{CDCl}_3$

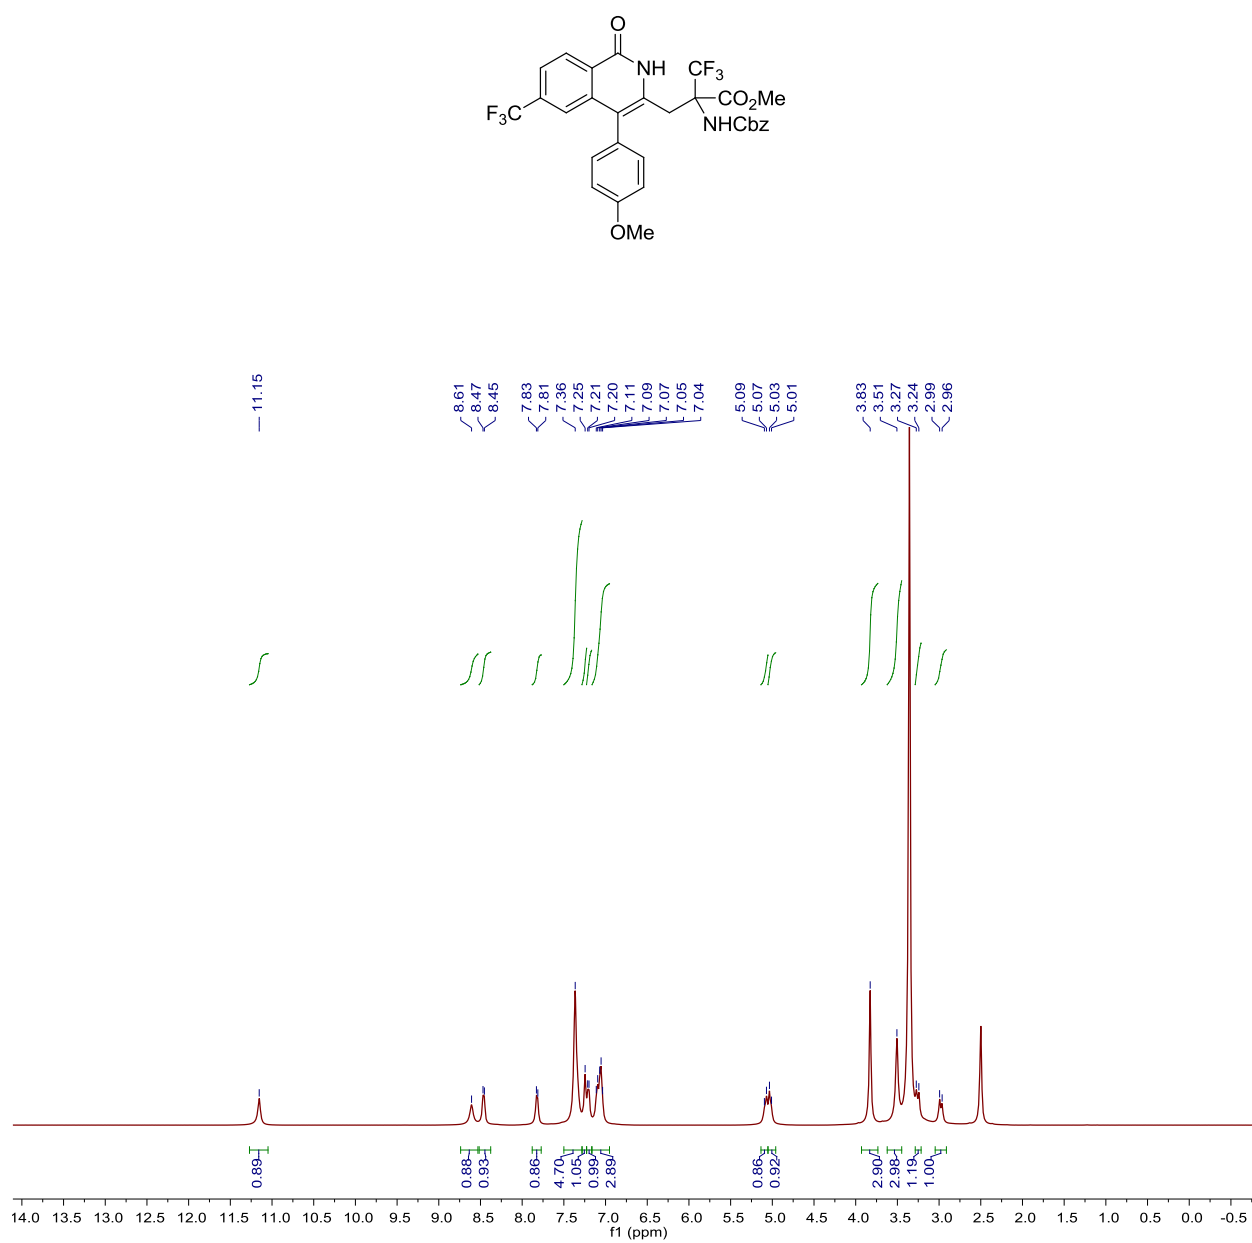

Figure S35. <sup>1</sup>H spectrum of **3r** in DMSO-*d*<sub>6</sub>

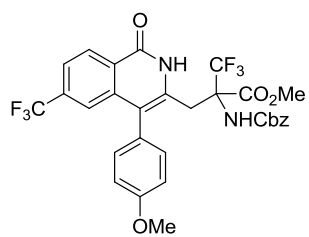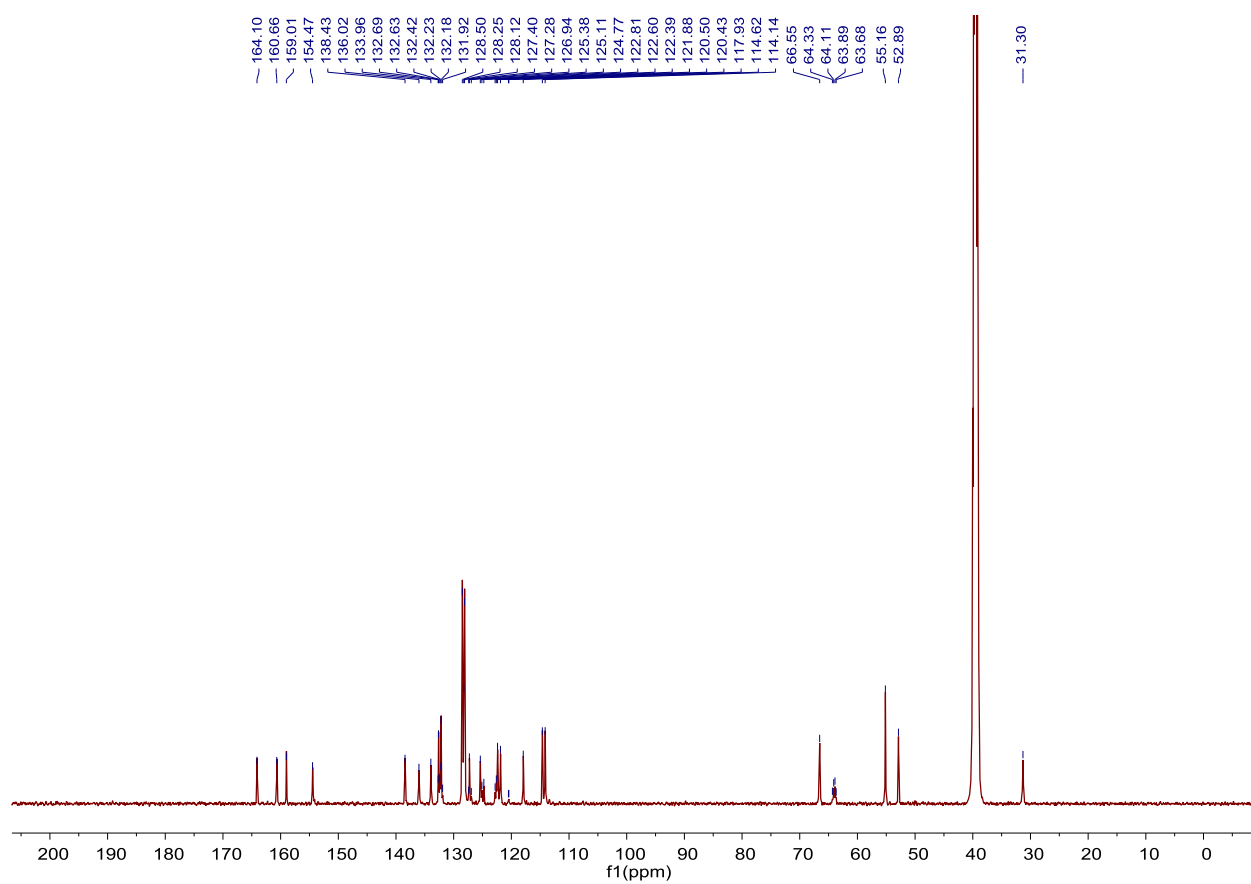

Figure S36.  $^{13}\text{C}$  spectrum of **3r** in  $\text{DMSO-}d_6$

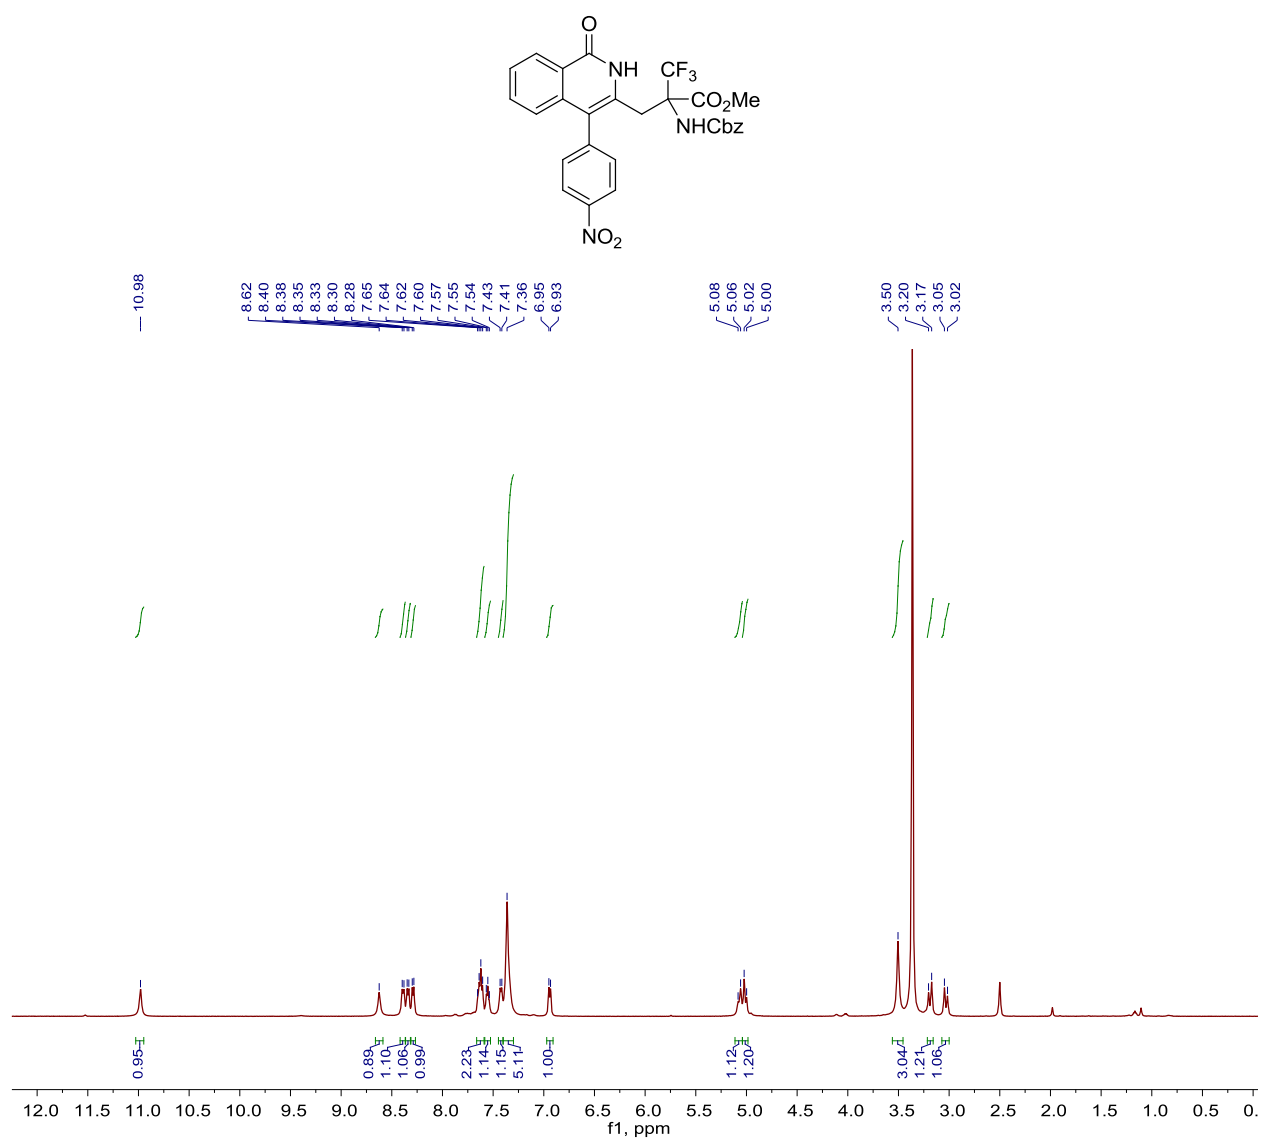

Figure S37. <sup>1</sup>H spectrum of **3s** in DMSO-*d*<sub>6</sub>



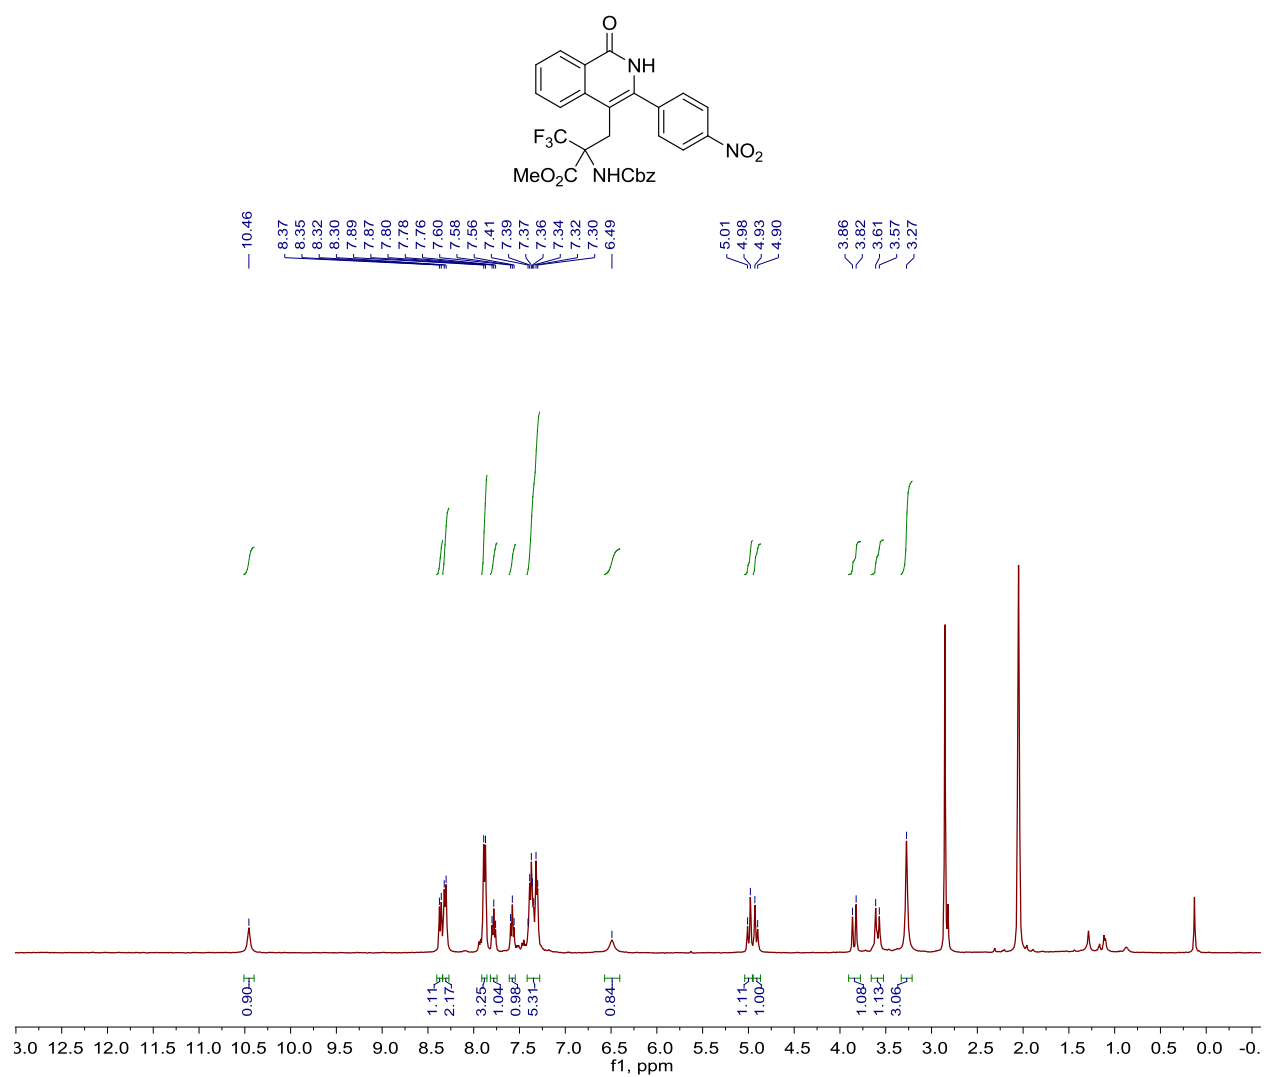

Figure S39.  $^1\text{H}$  spectrum of **3t** in acetone- $d_6$



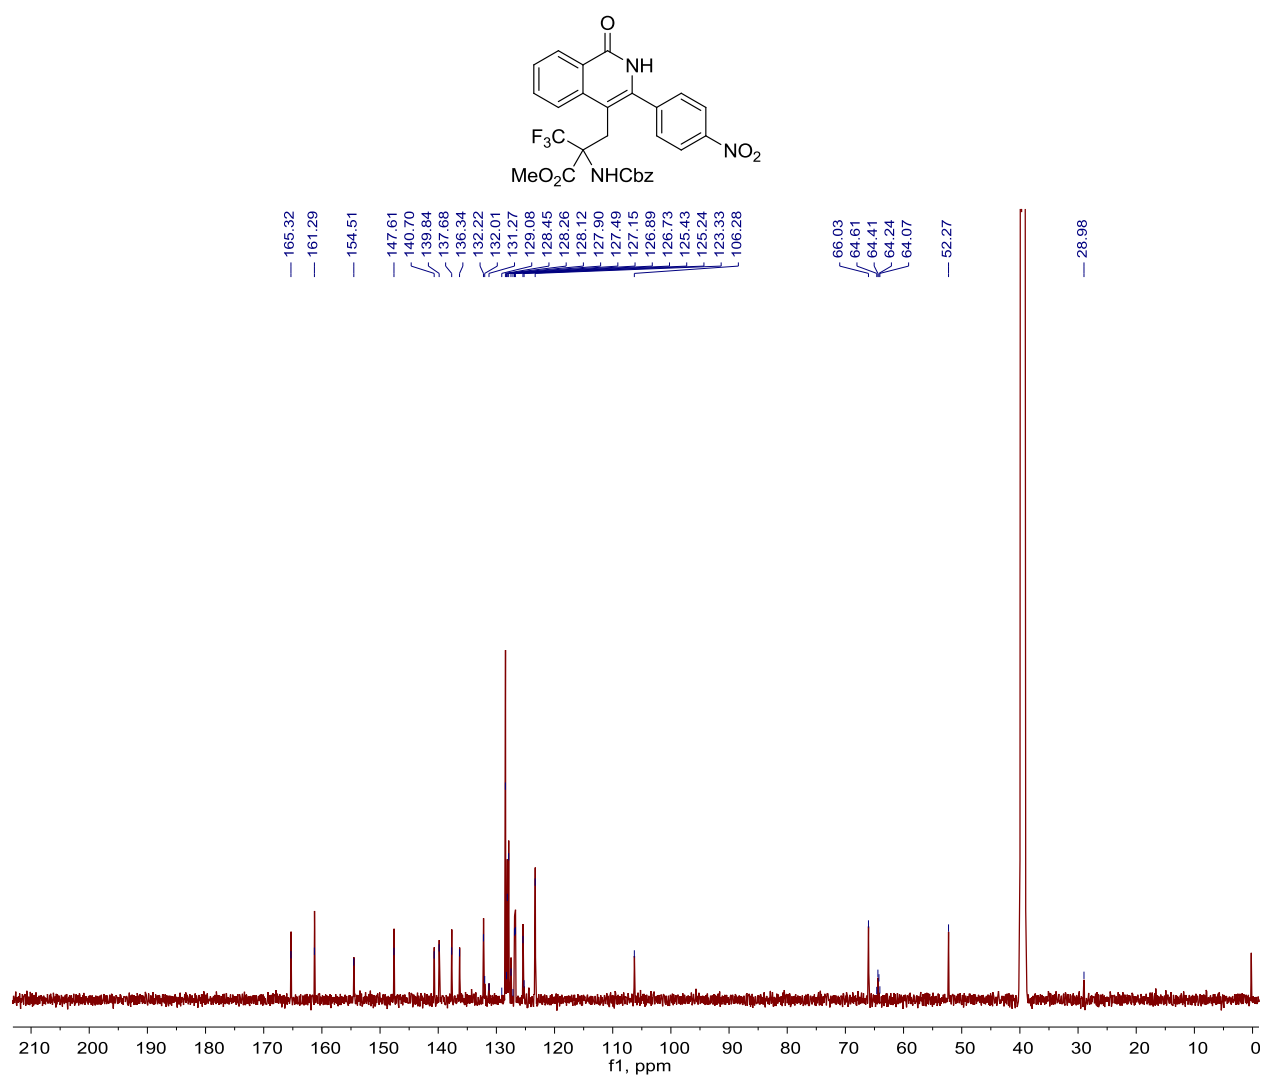

Figure S40.  $^{13}\text{C}$  spectrum of **3t** in  $\text{DMSO-}d_6$

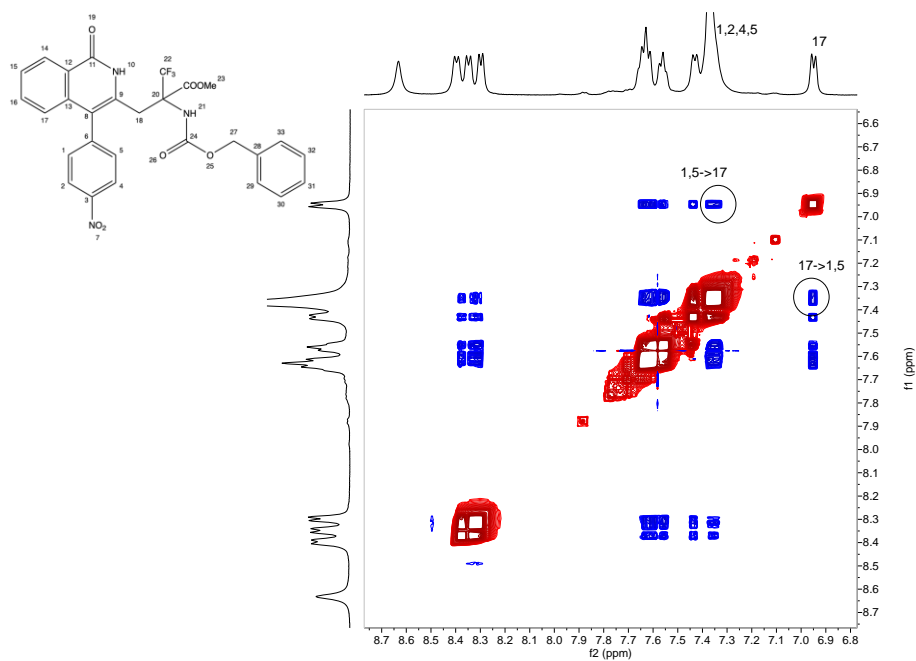

Figure S41. ROESY NMR of **3s** in DMSO-*d*<sub>6</sub>

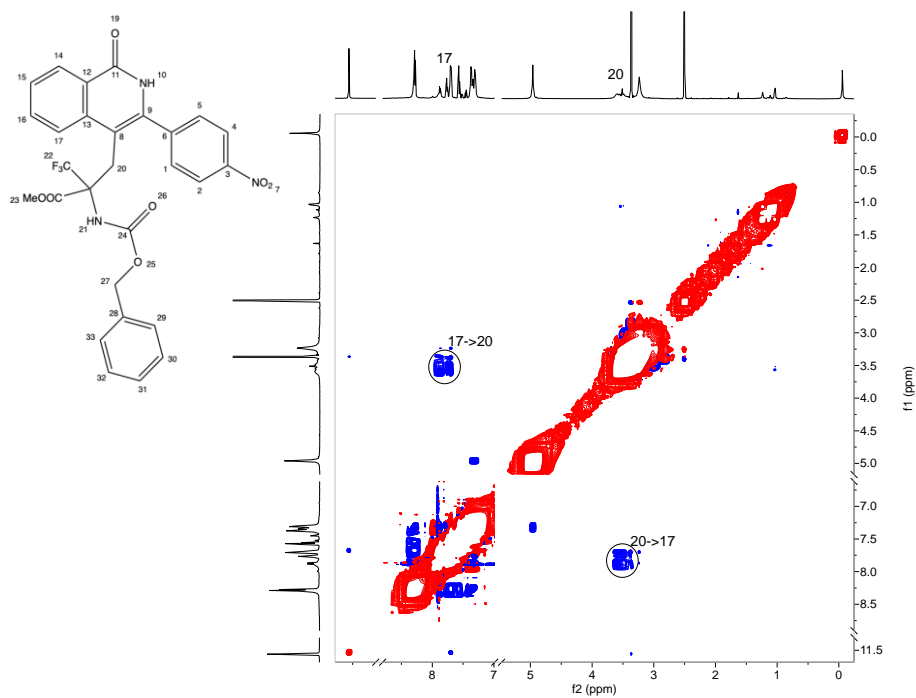

Figure S42. ROESY NMR of **3t** in DMSO-*d*<sub>6</sub>

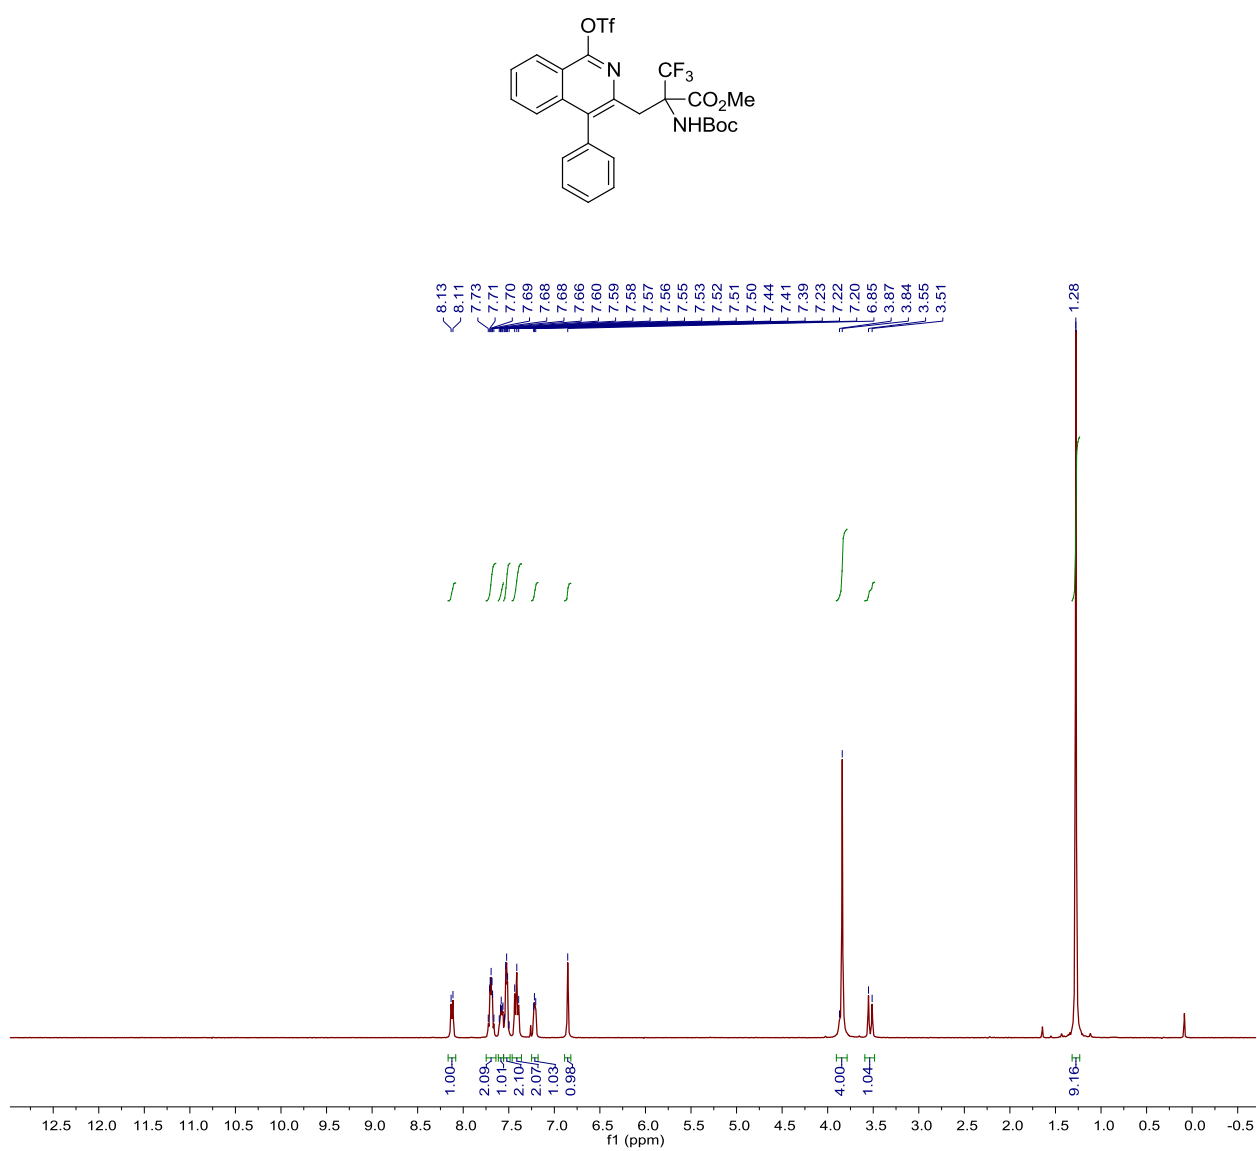

Figure S43.  $^1\text{H}$  spectrum of **4a** in  $\text{CDCl}_3$

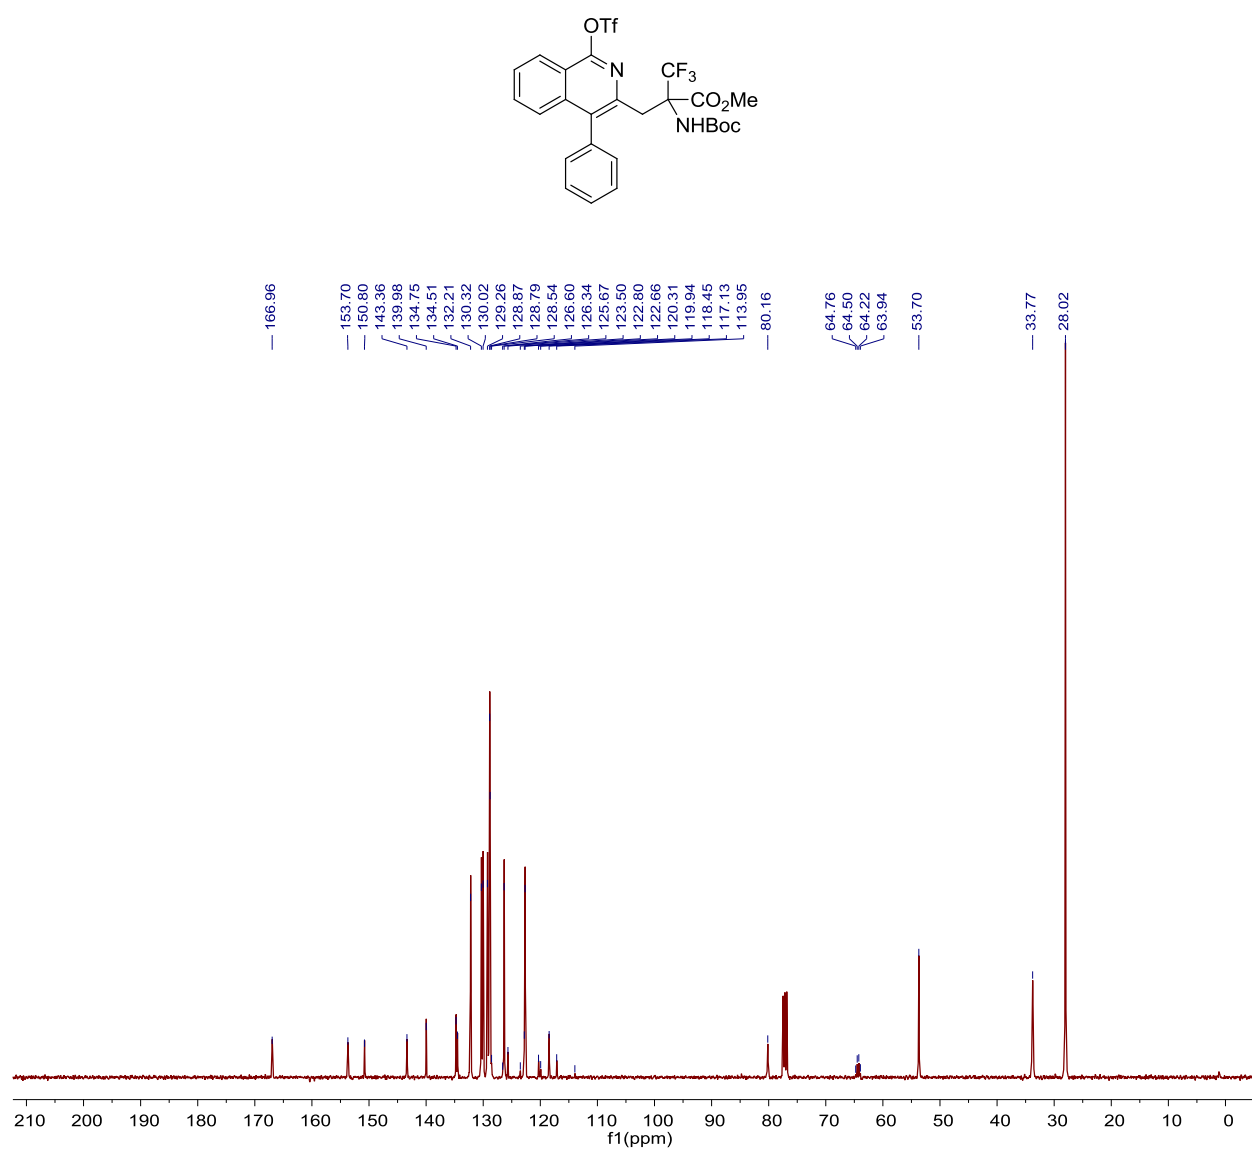

Figure S44.  $^{13}\text{C}$  spectrum of **4a** in CDCl<sub>3</sub>

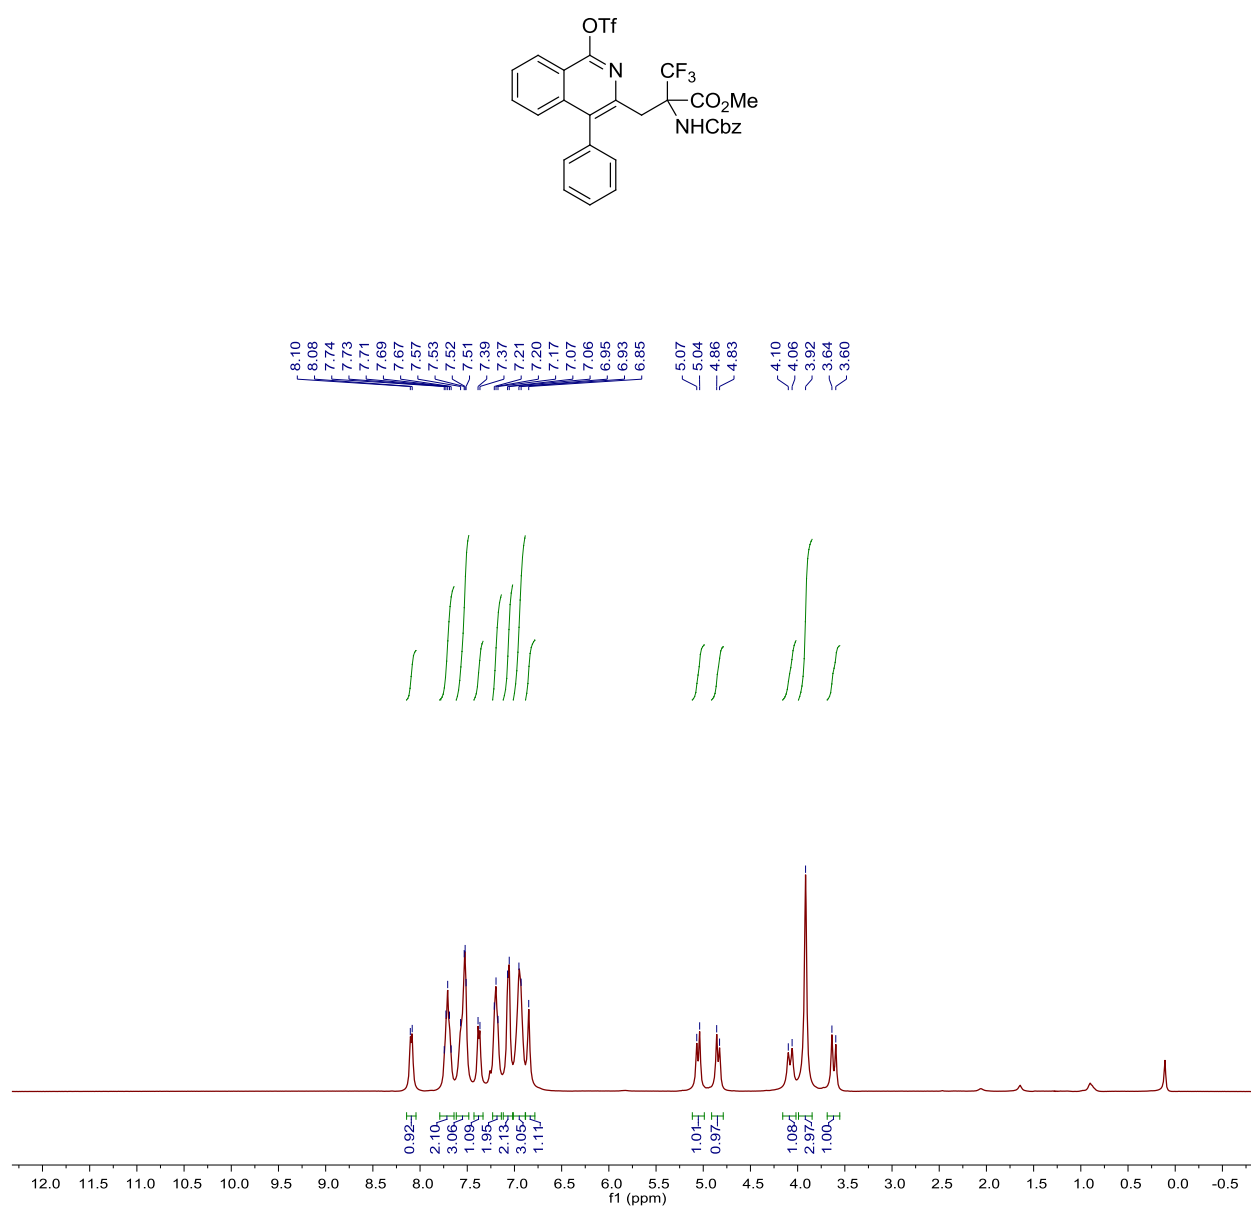

Figure S45.  $^1\text{H}$  spectrum of **4b** in CDCl<sub>3</sub>

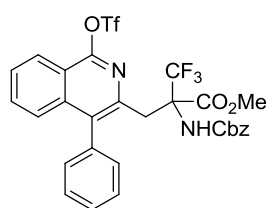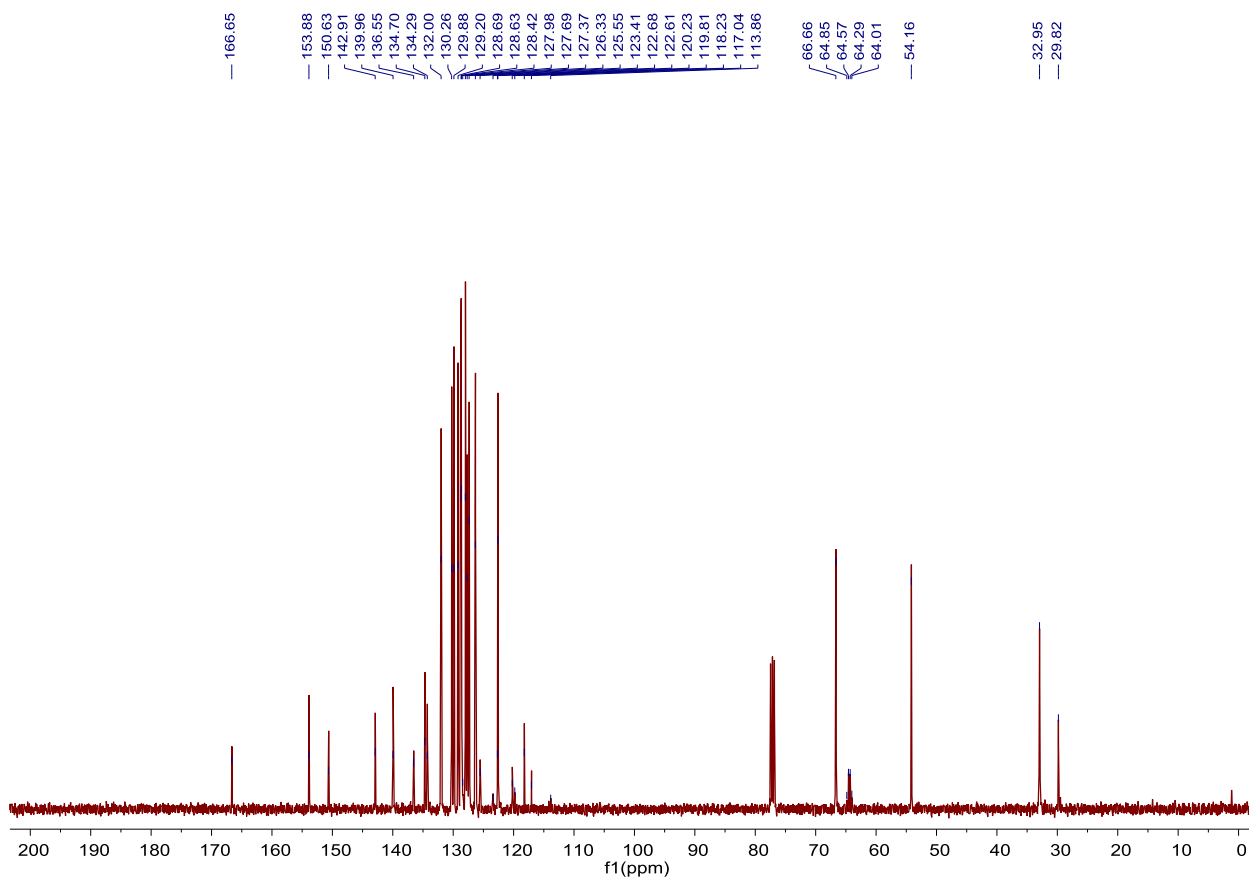

Figure S46.  $^{13}\text{C}$  spectrum of **4b** in  $\text{CDCl}_3$

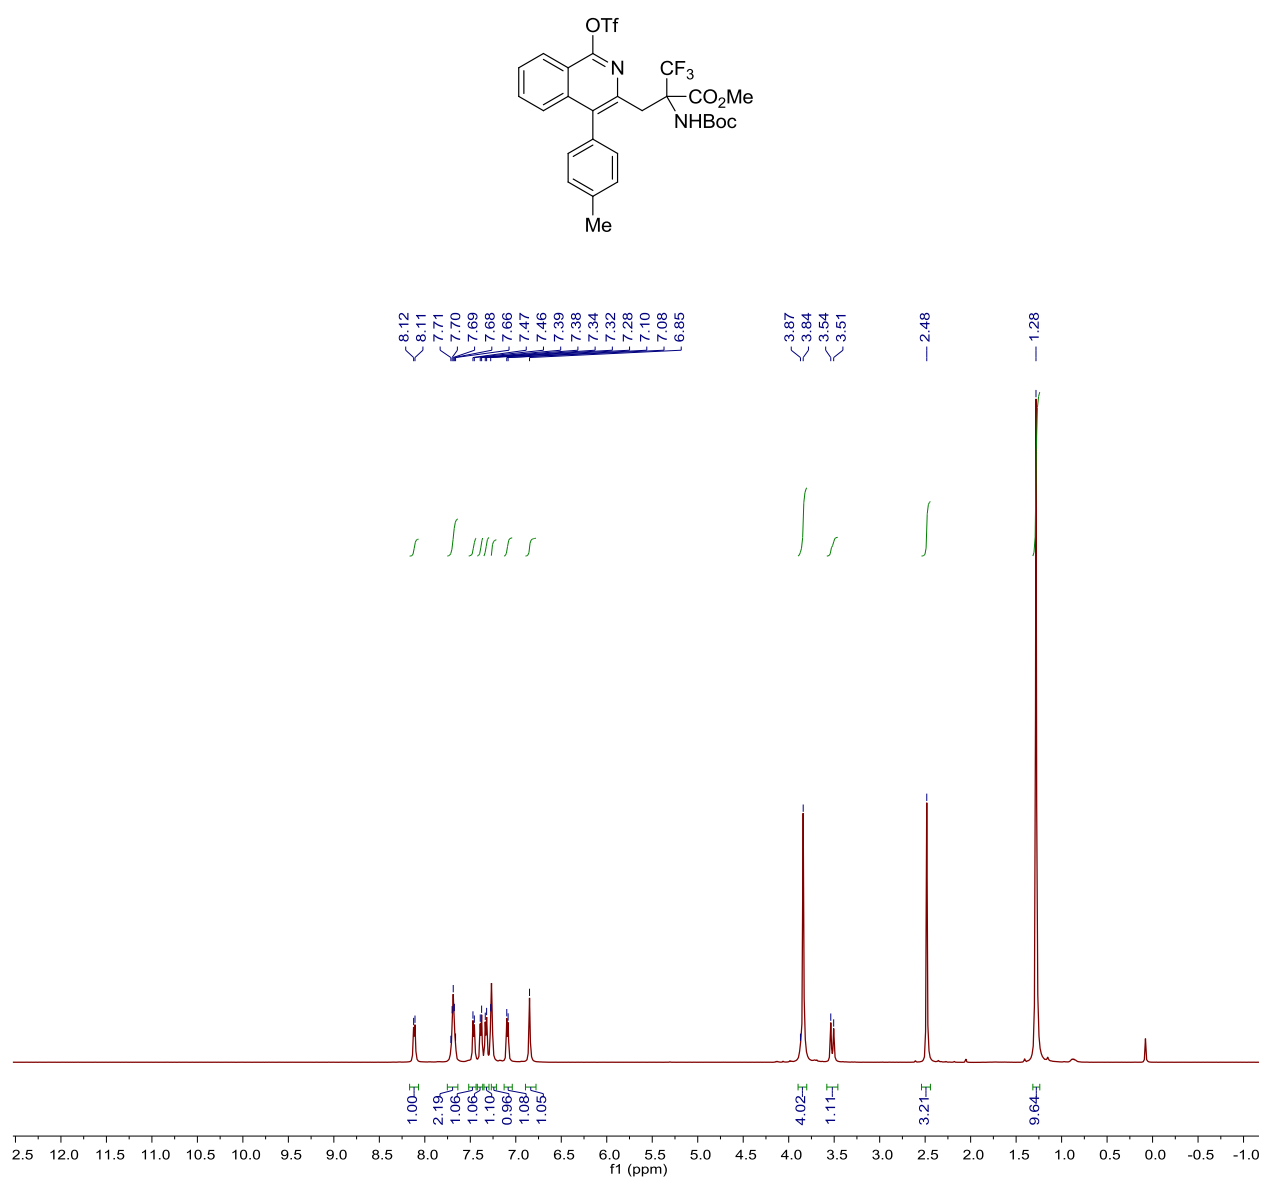

Figure S47.  $^1\text{H}$  spectrum of **4c** in CDCl<sub>3</sub>

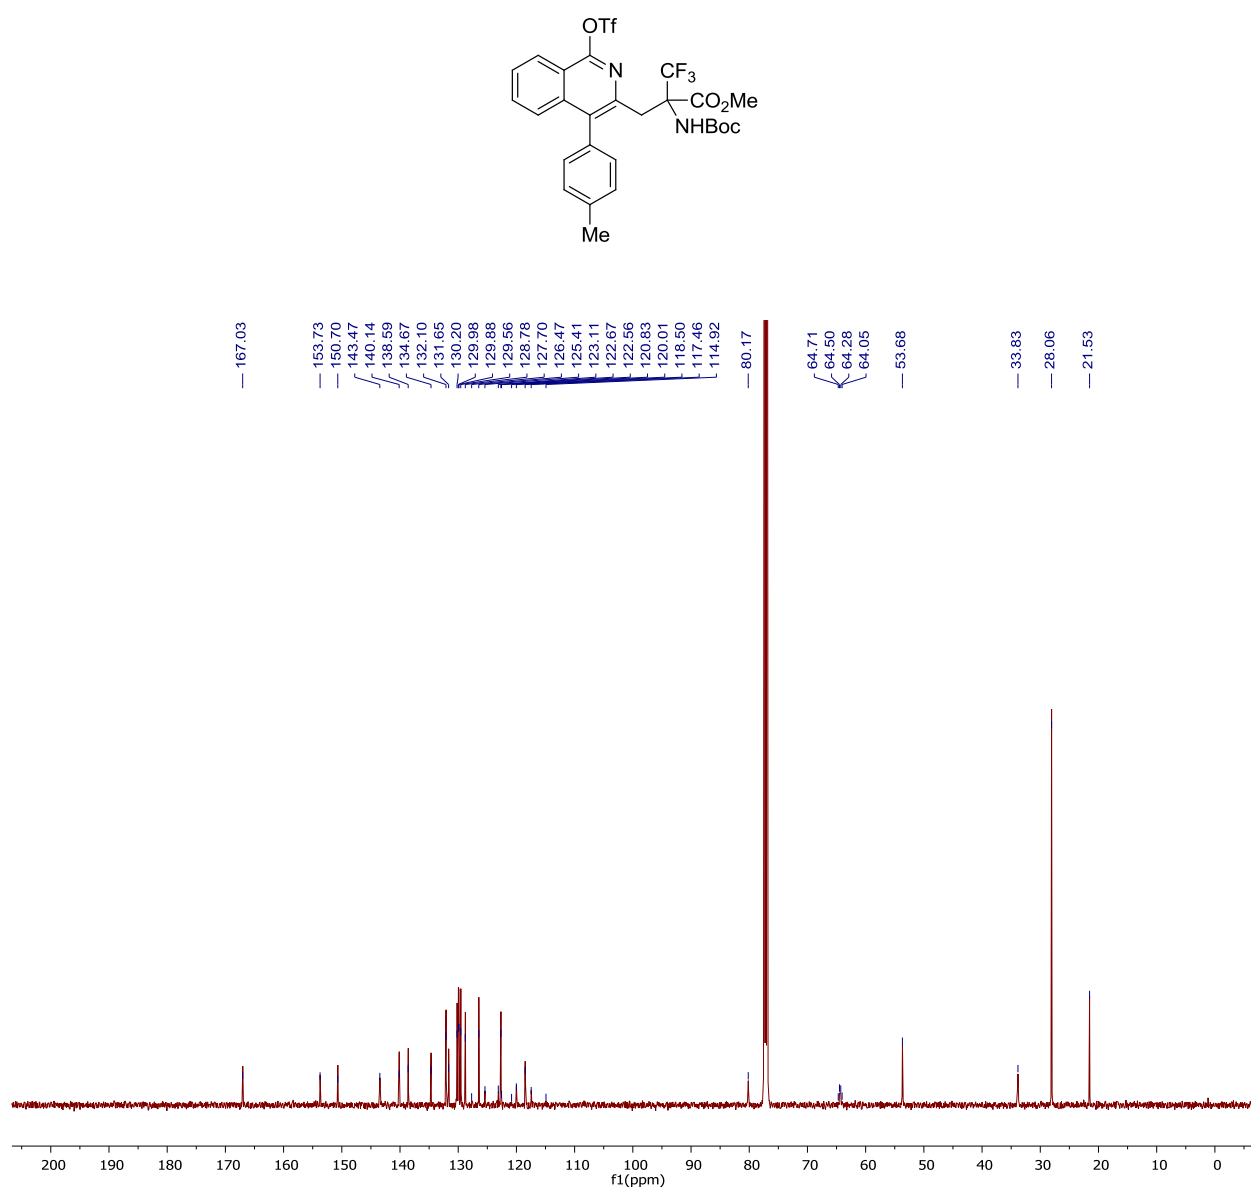

Figure S48.  $^{13}\text{C}$  spectrum of **4c** in  $\text{CDCl}_3$



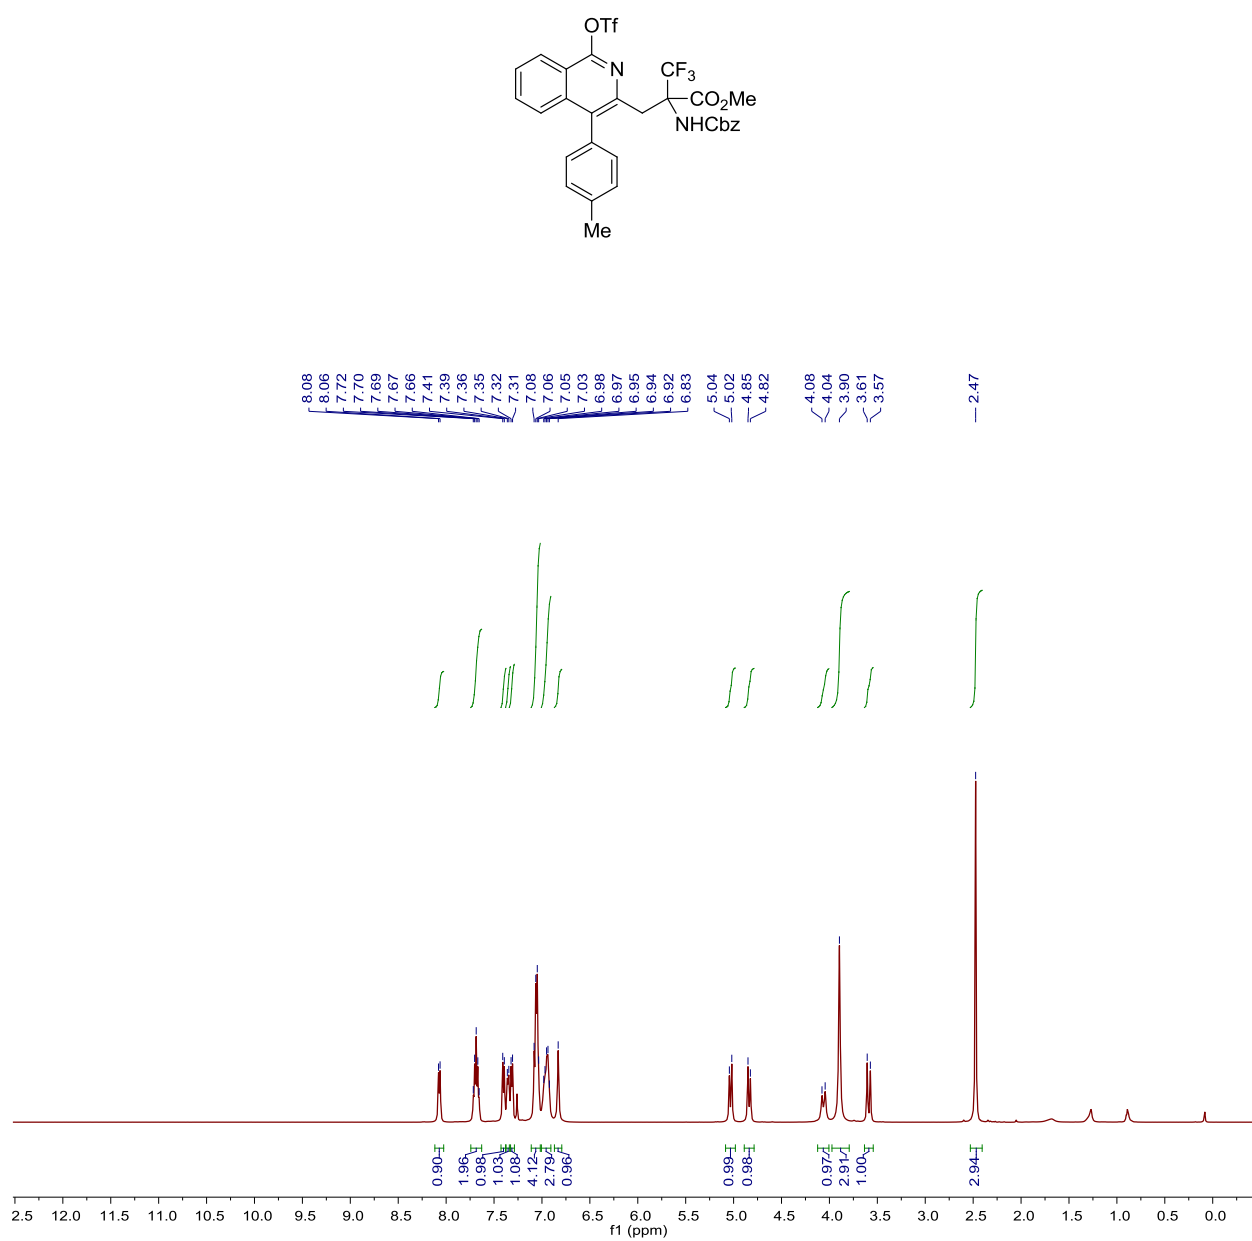

Figure S49.  $^1\text{H}$  spectrum of **4d** in CDCl<sub>3</sub>

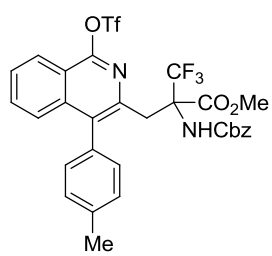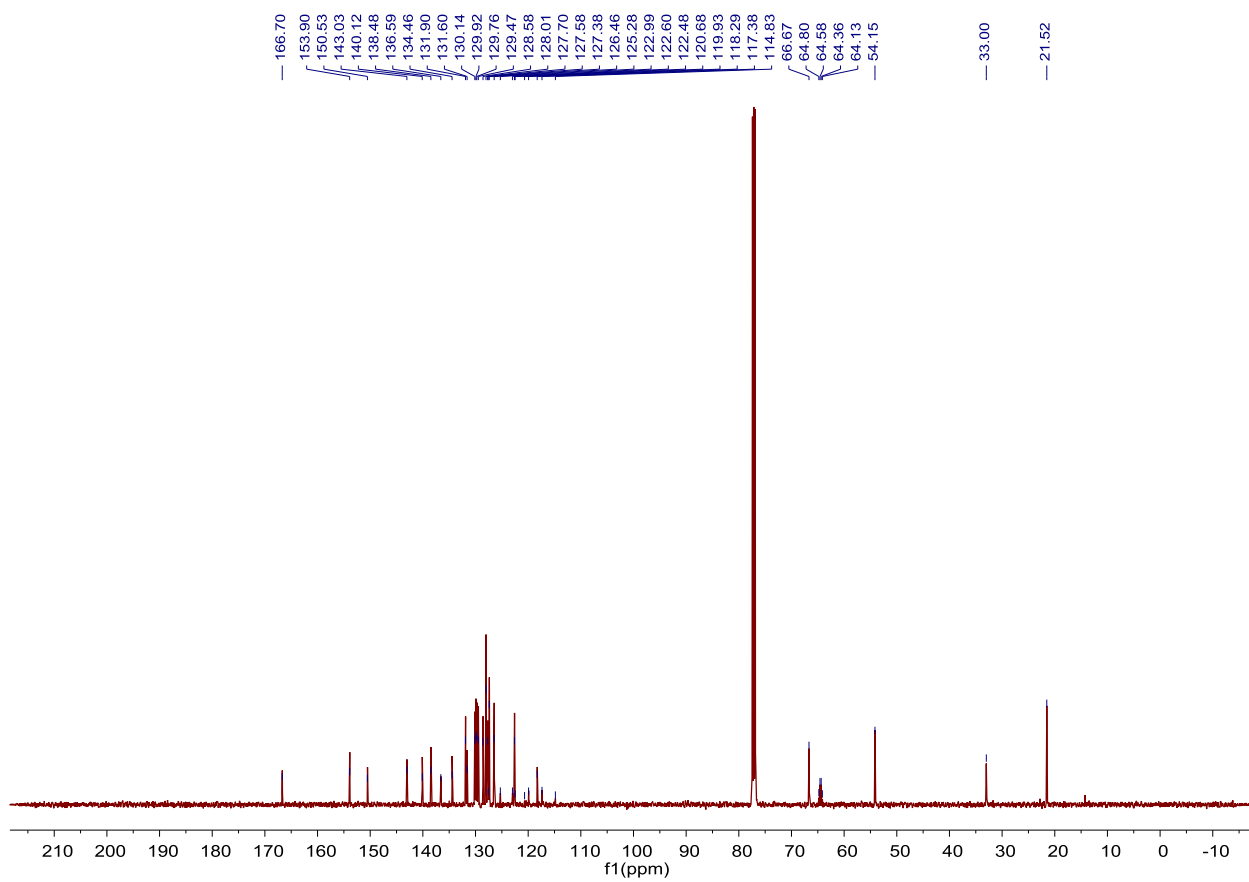

Figure S50.  $^{13}\text{C}$  spectrum of **4d** in  $\text{CDCl}_3$

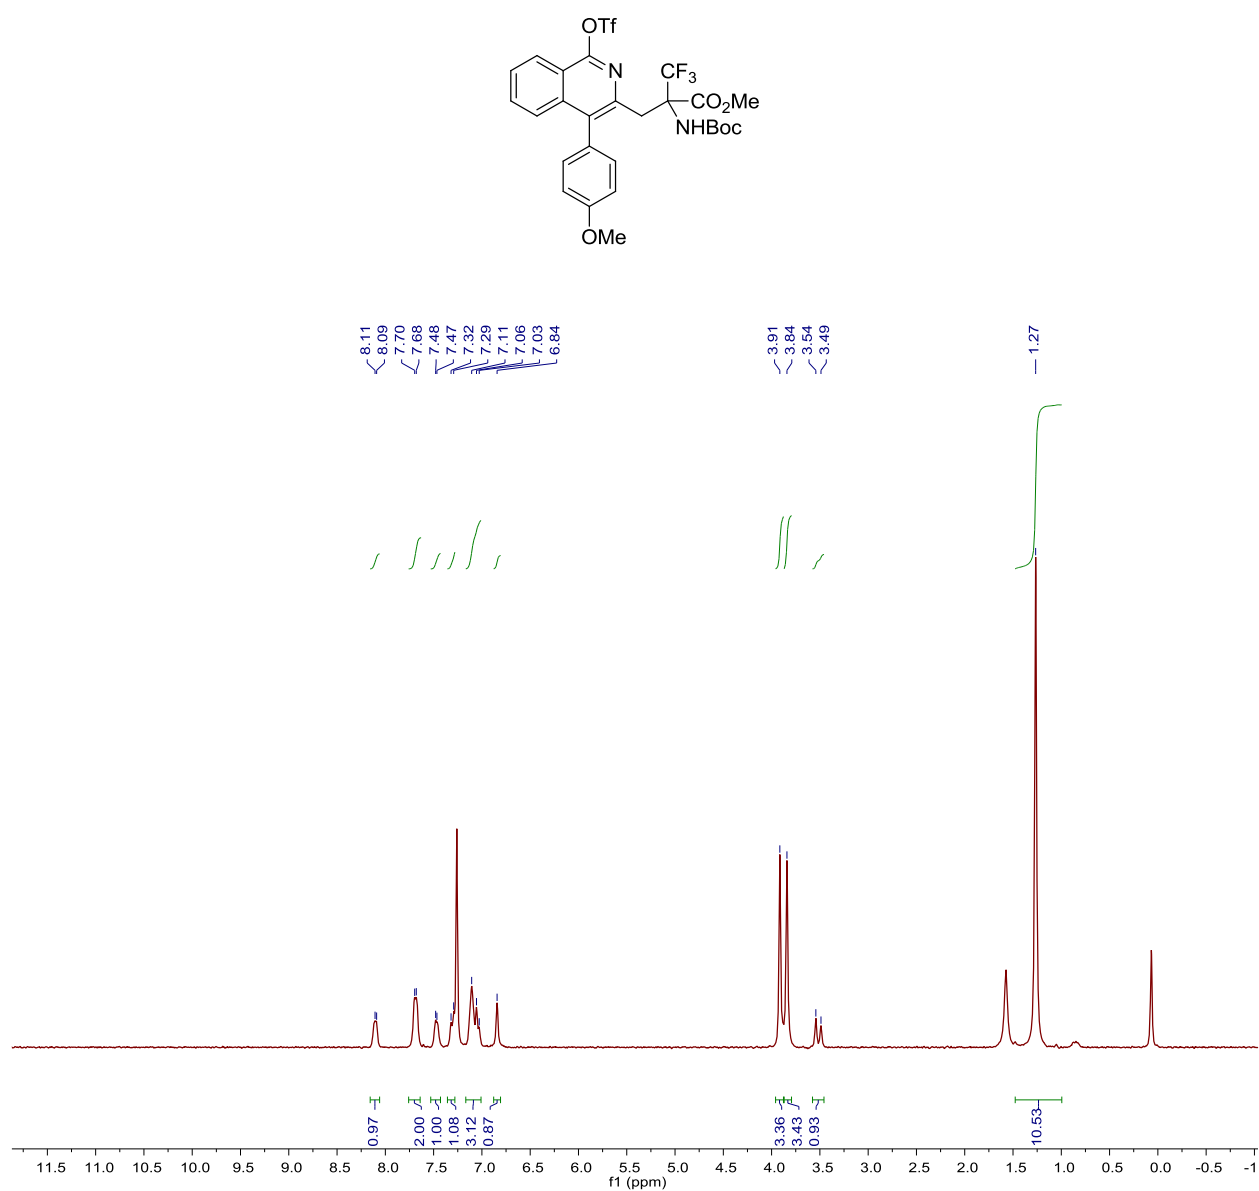

Figure S51.  $^1\text{H}$  spectrum of **4e** in CDCl<sub>3</sub>

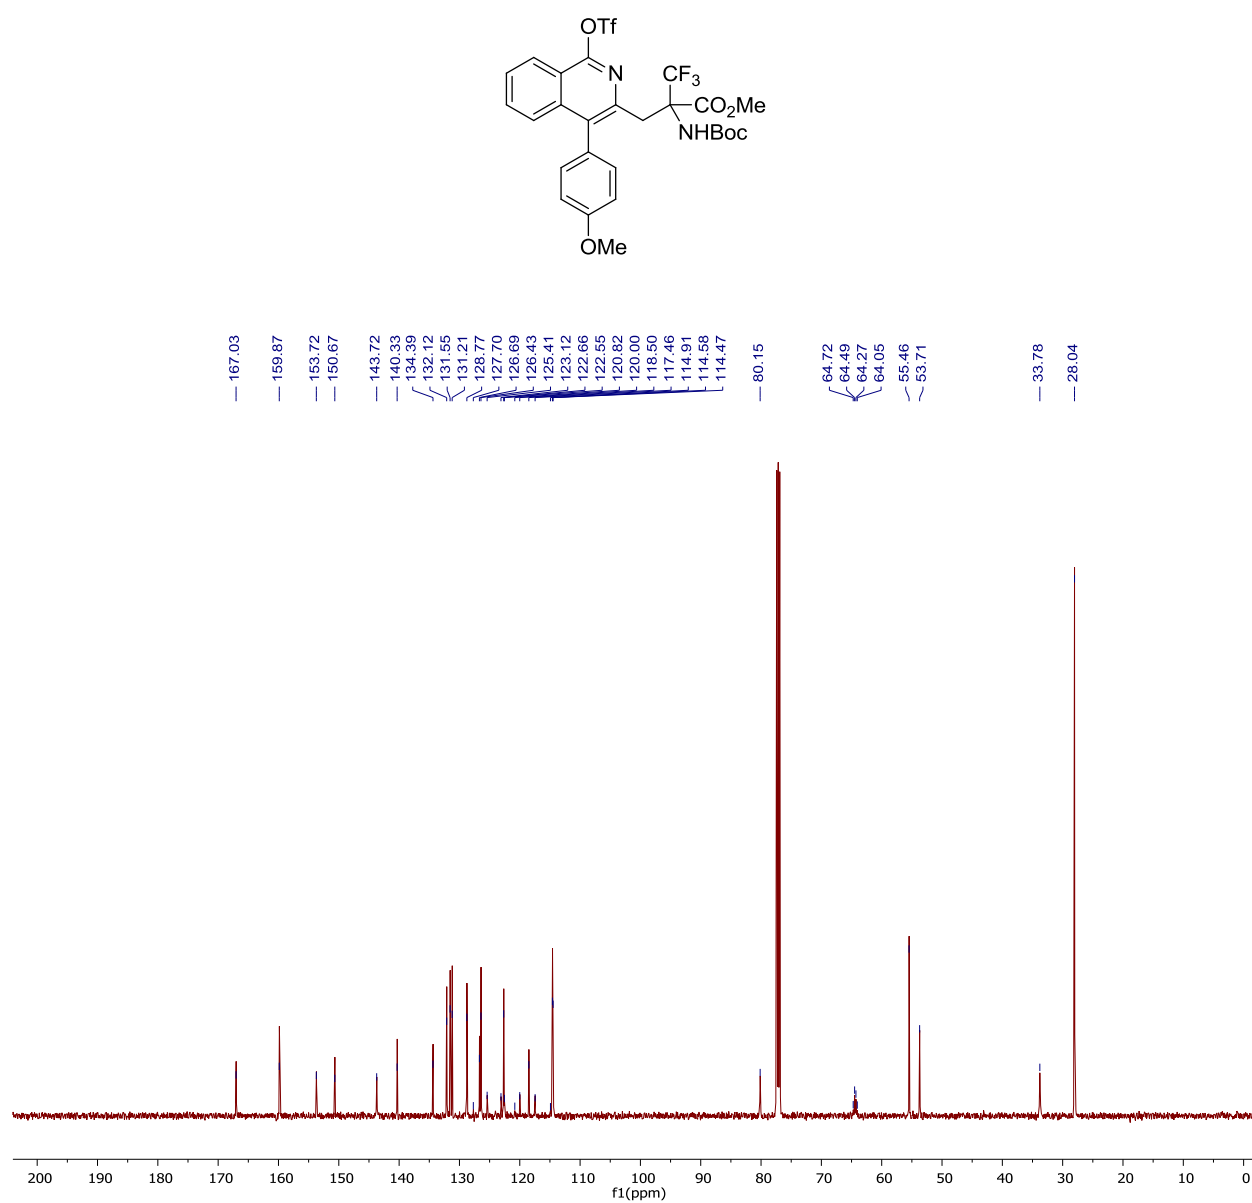

Figure S52.  $^{13}\text{C}$  spectrum of **4e** in CDCl<sub>3</sub>

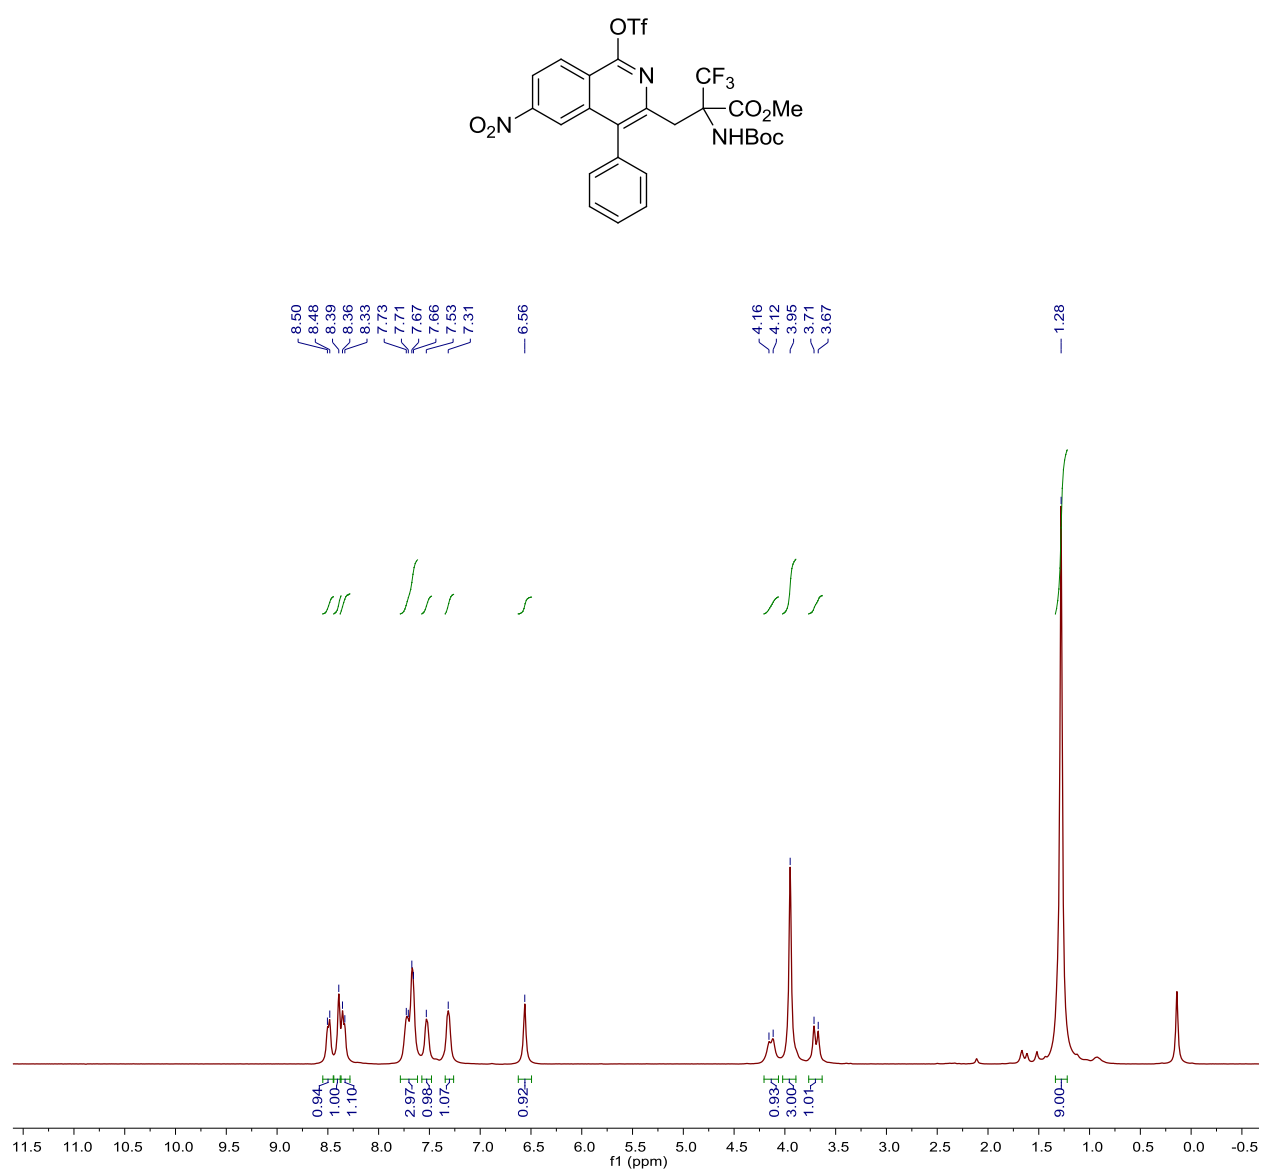

Figure S53.  $^1\text{H}$  spectrum of **4f** in  $\text{CDCl}_3$

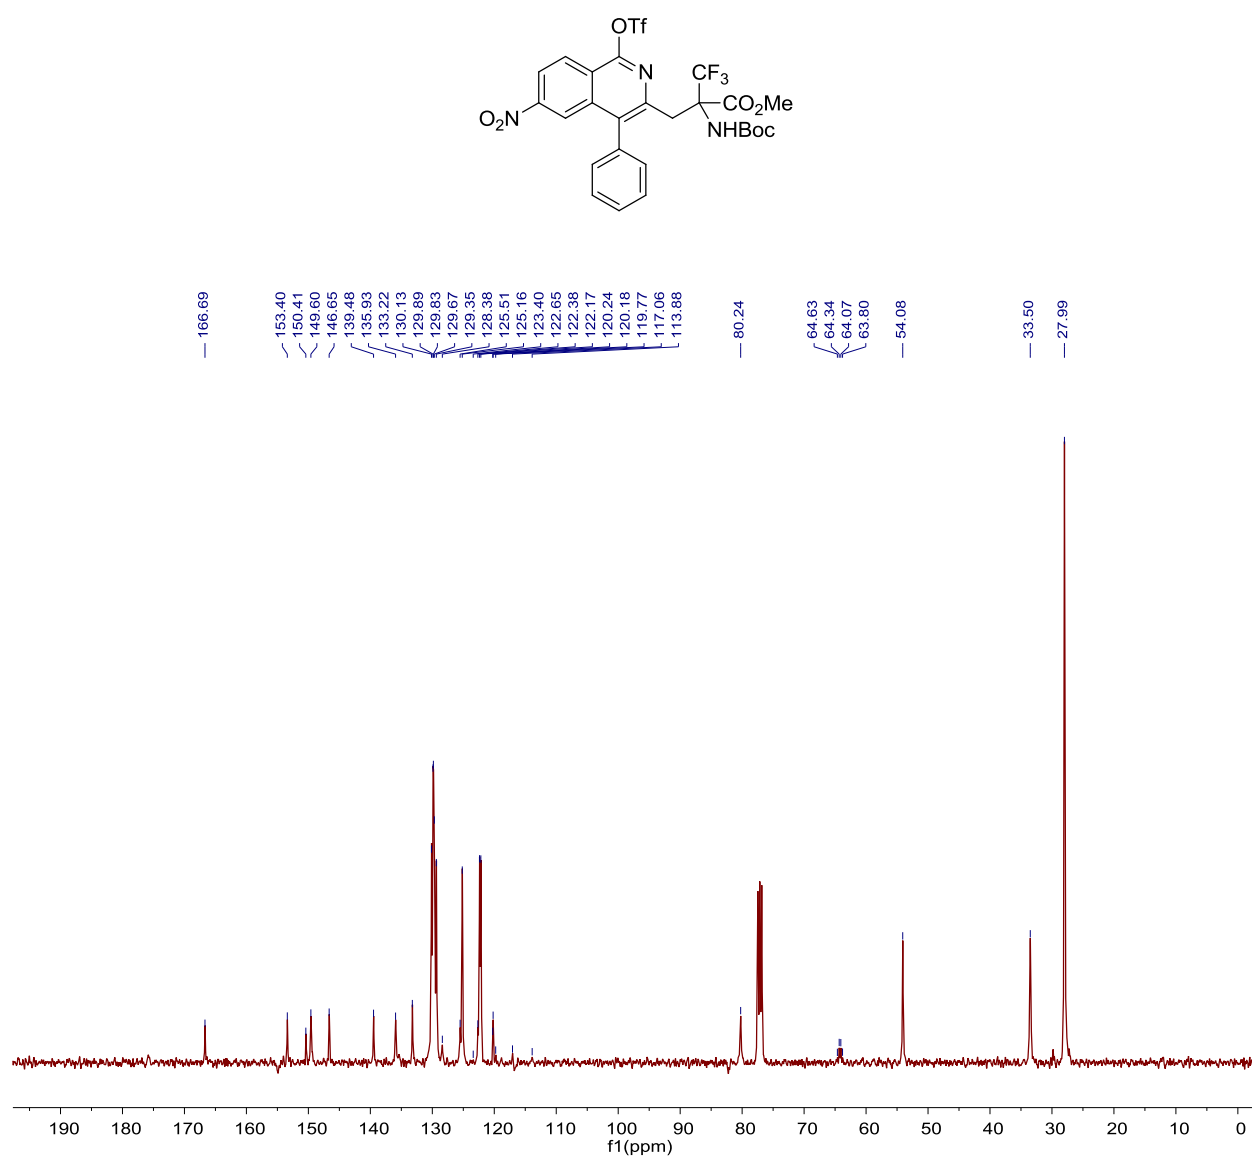

Figure S54.  $^{13}\text{C}$  spectrum of **4f** in CDCl<sub>3</sub>

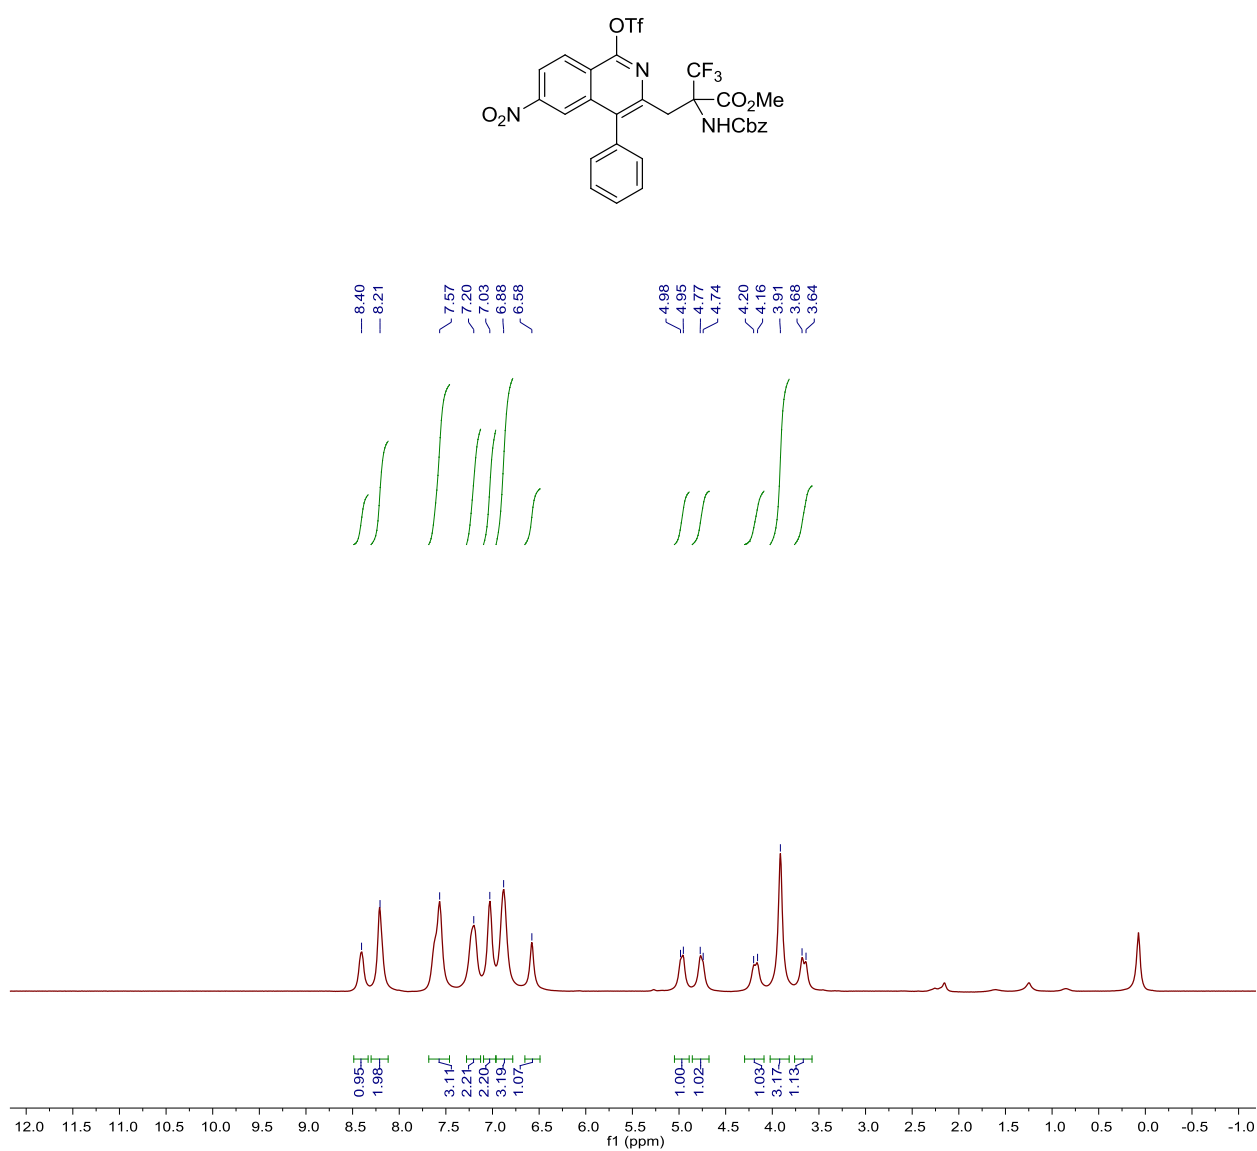

Figure S55.  $^1\text{H}$  spectrum of **4g** in CDCl<sub>3</sub>

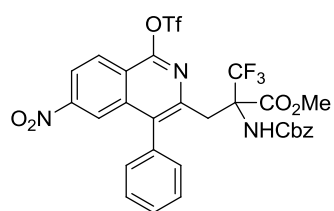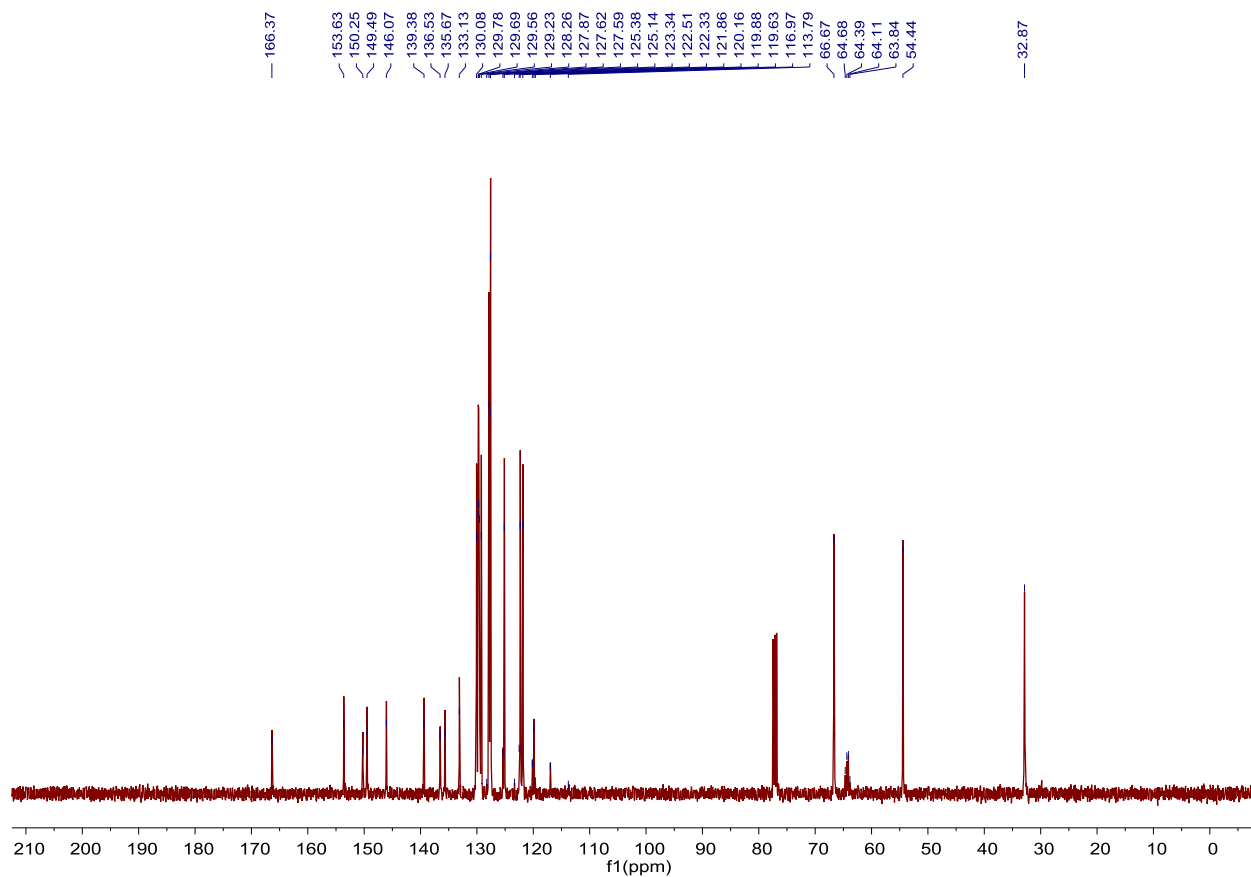

Figure S56.  $^{13}\text{C}$  spectrum of **4g** in  $\text{CDCl}_3$



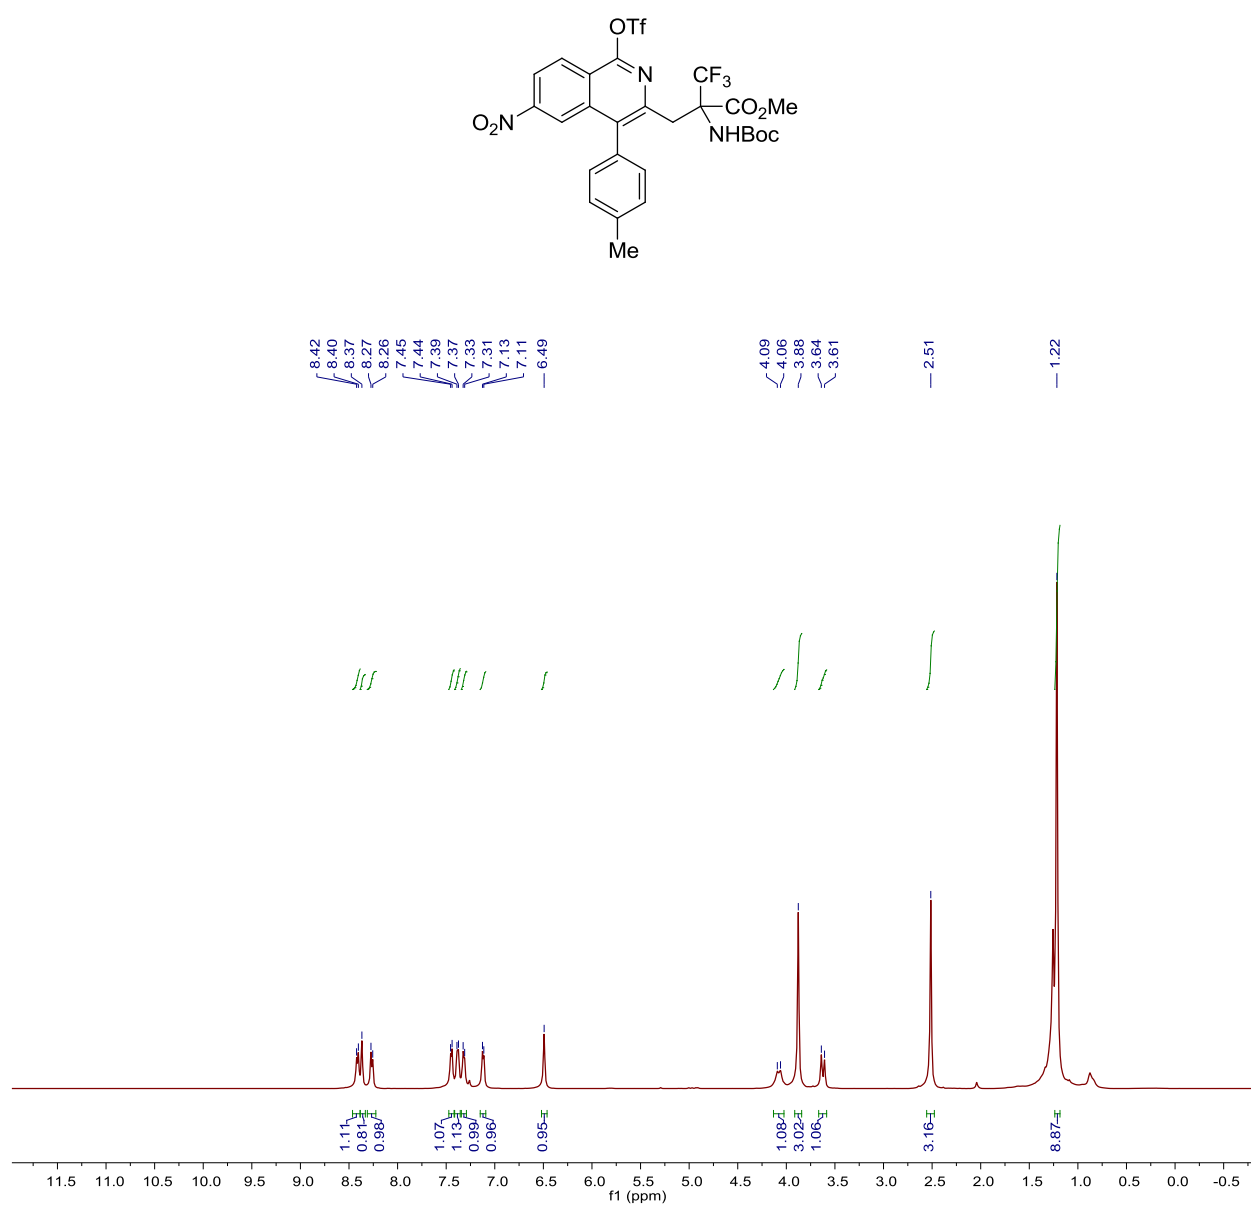

Figure S57.  $^1\text{H}$  spectrum of **4h** in CDCl<sub>3</sub>

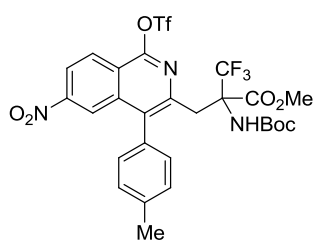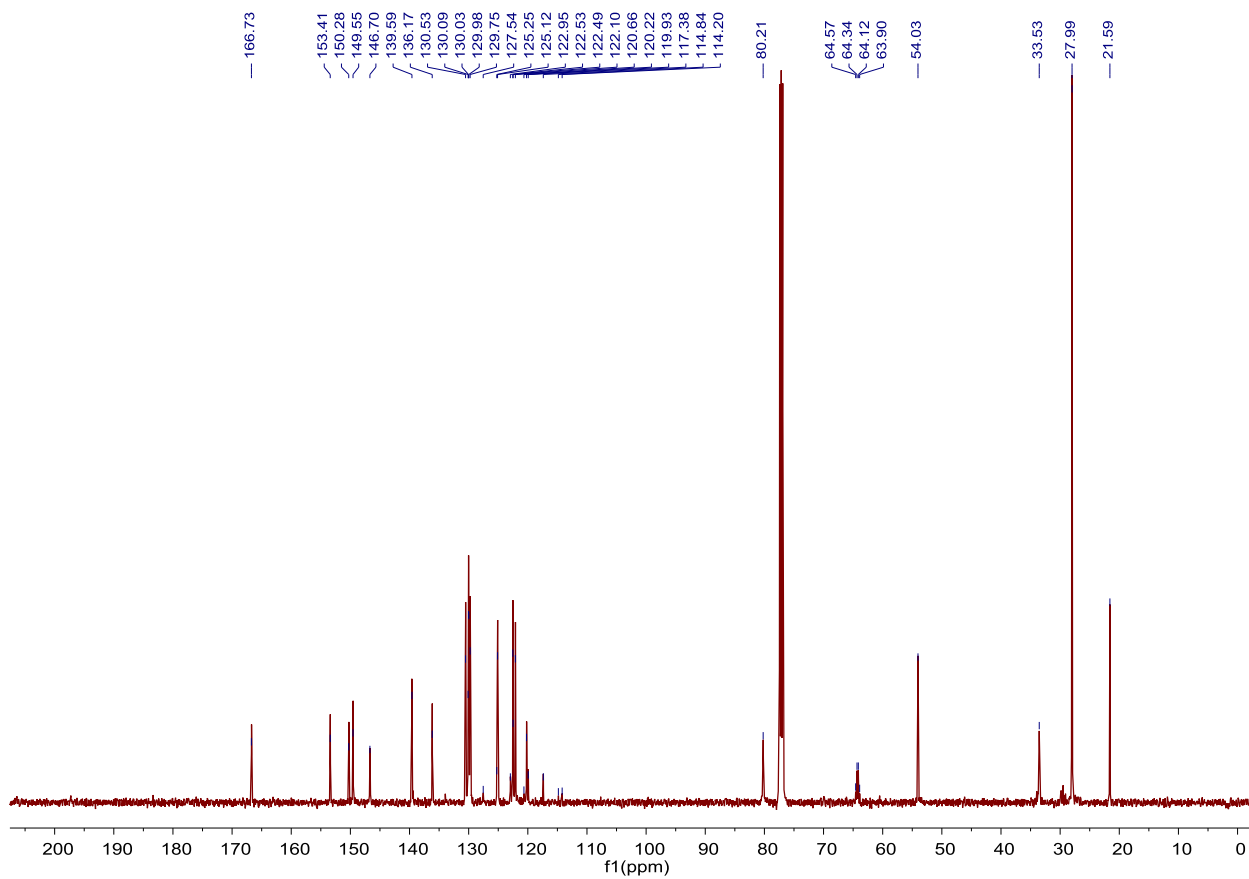

Figure S58.  $^{13}\text{C}$  spectrum of **4h** in  $\text{CDCl}_3$

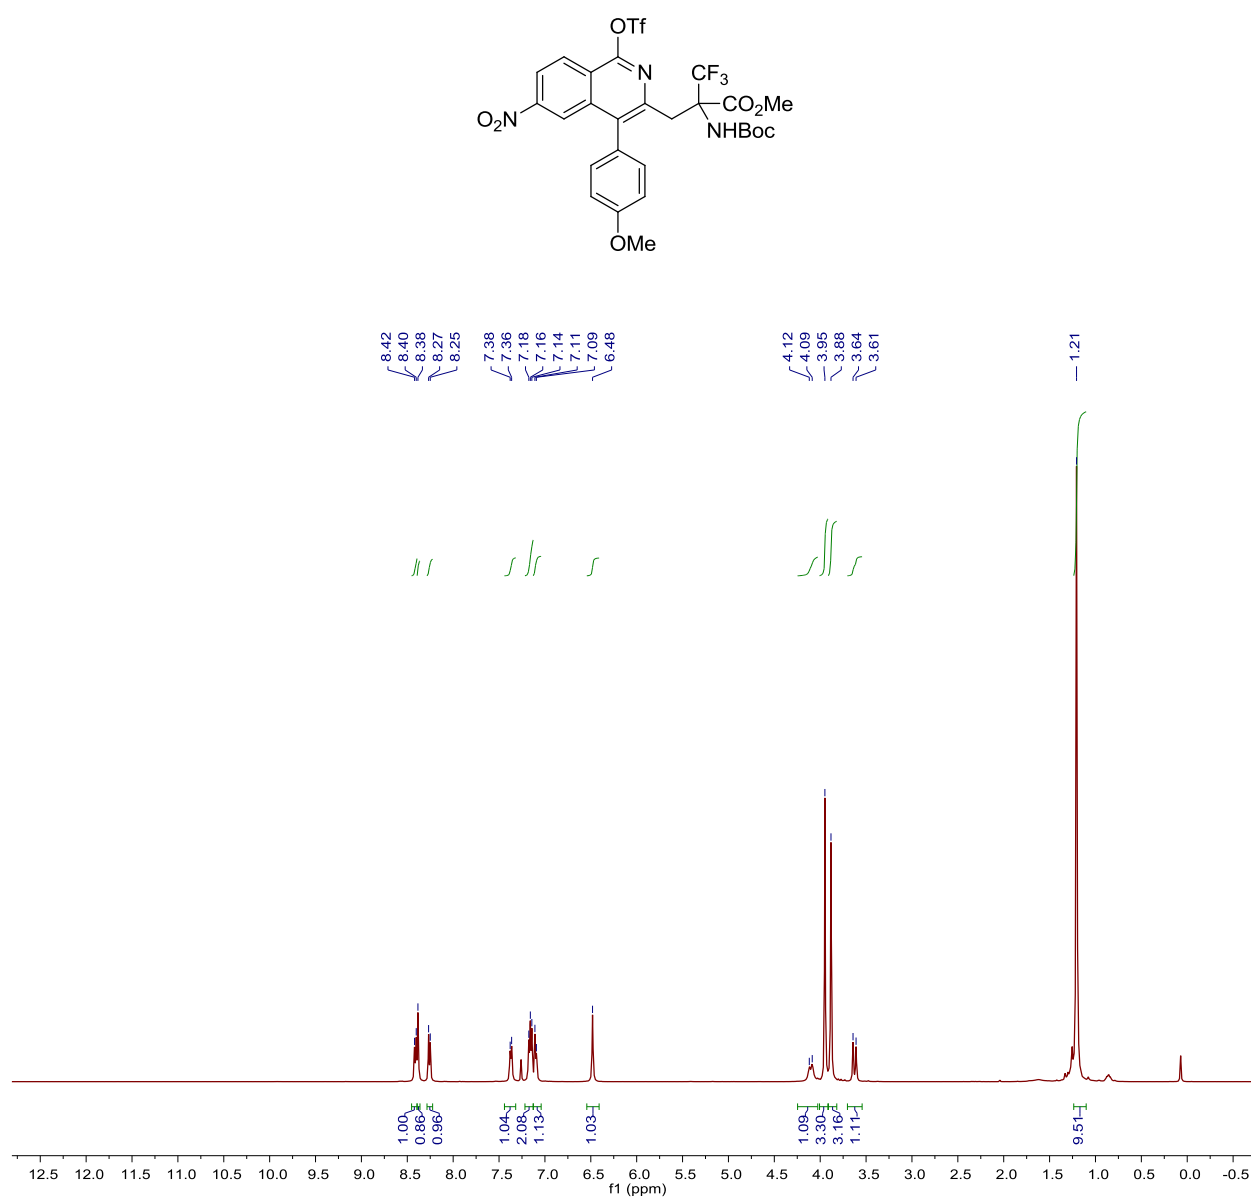

Figure S59.  $^1\text{H}$  spectrum of **4i** in CDCl<sub>3</sub>

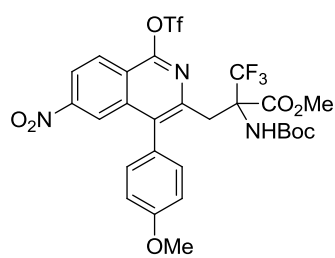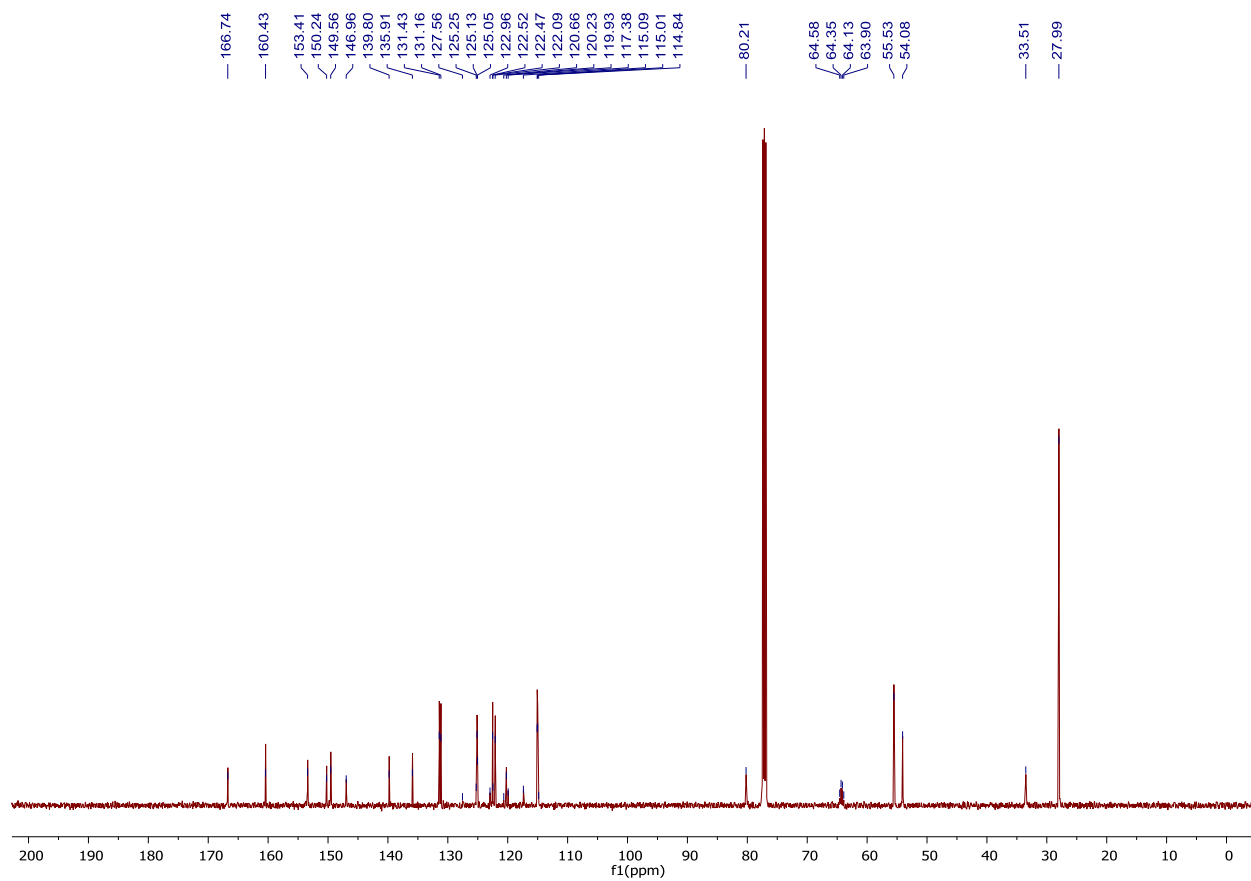

Figure S60.  $^{13}\text{C}$  spectrum of **4i** in  $\text{CDCl}_3$

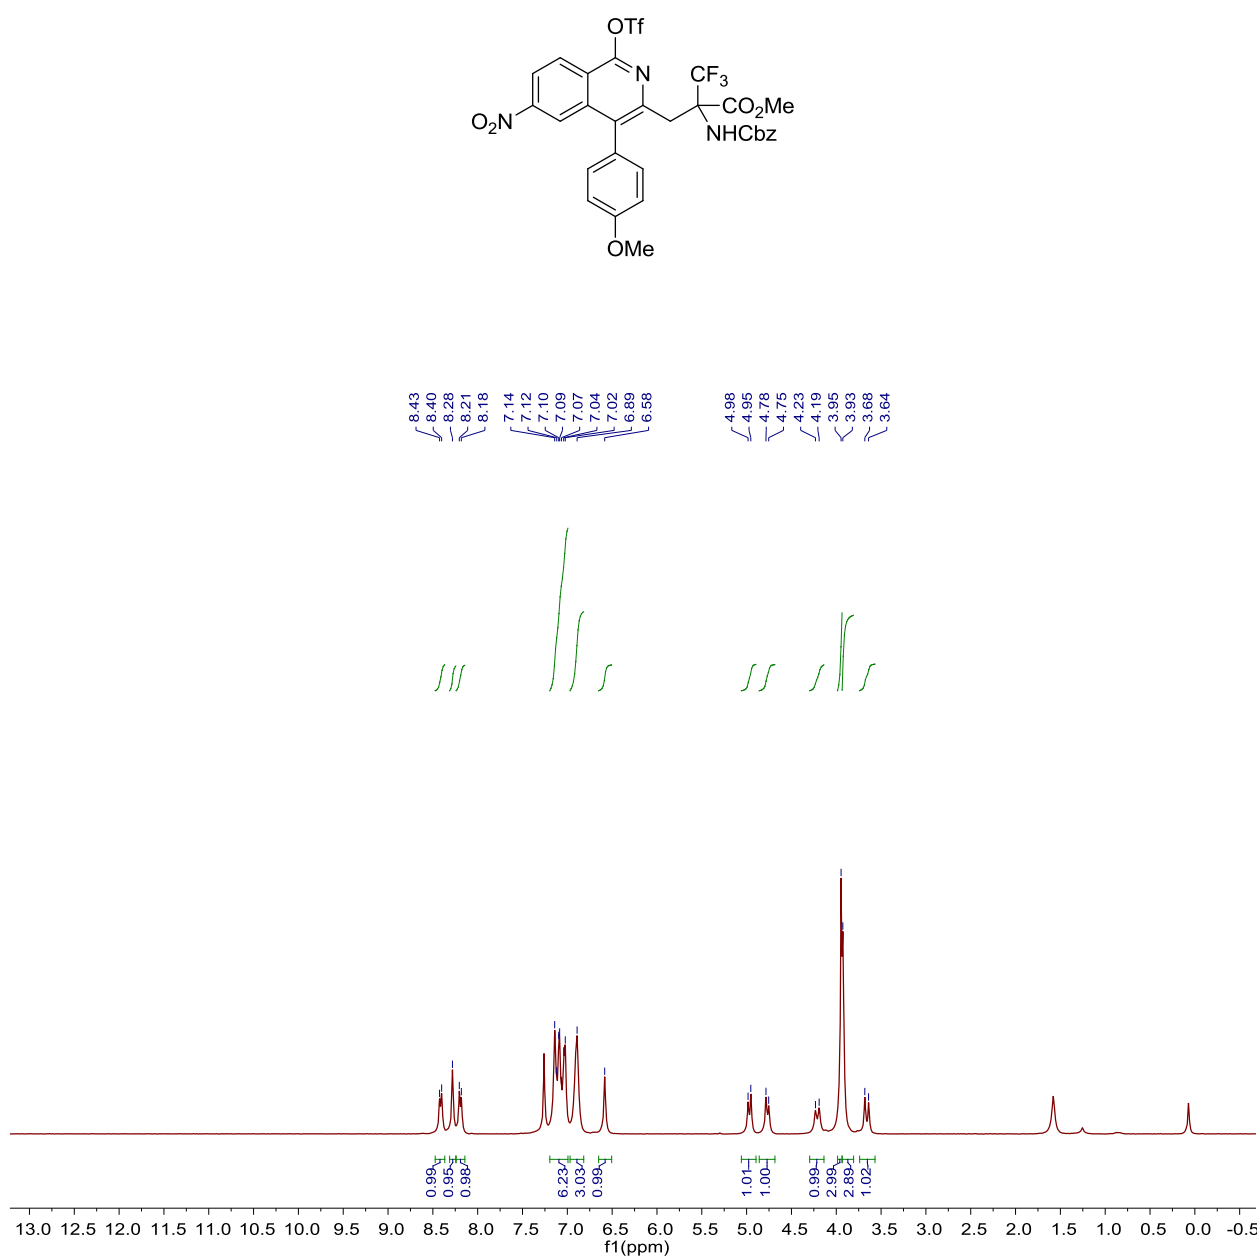

Figure S61.  $^1\text{H}$  spectrum of **4j** in CDCl<sub>3</sub>

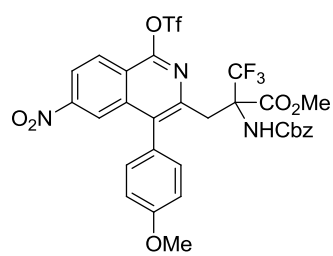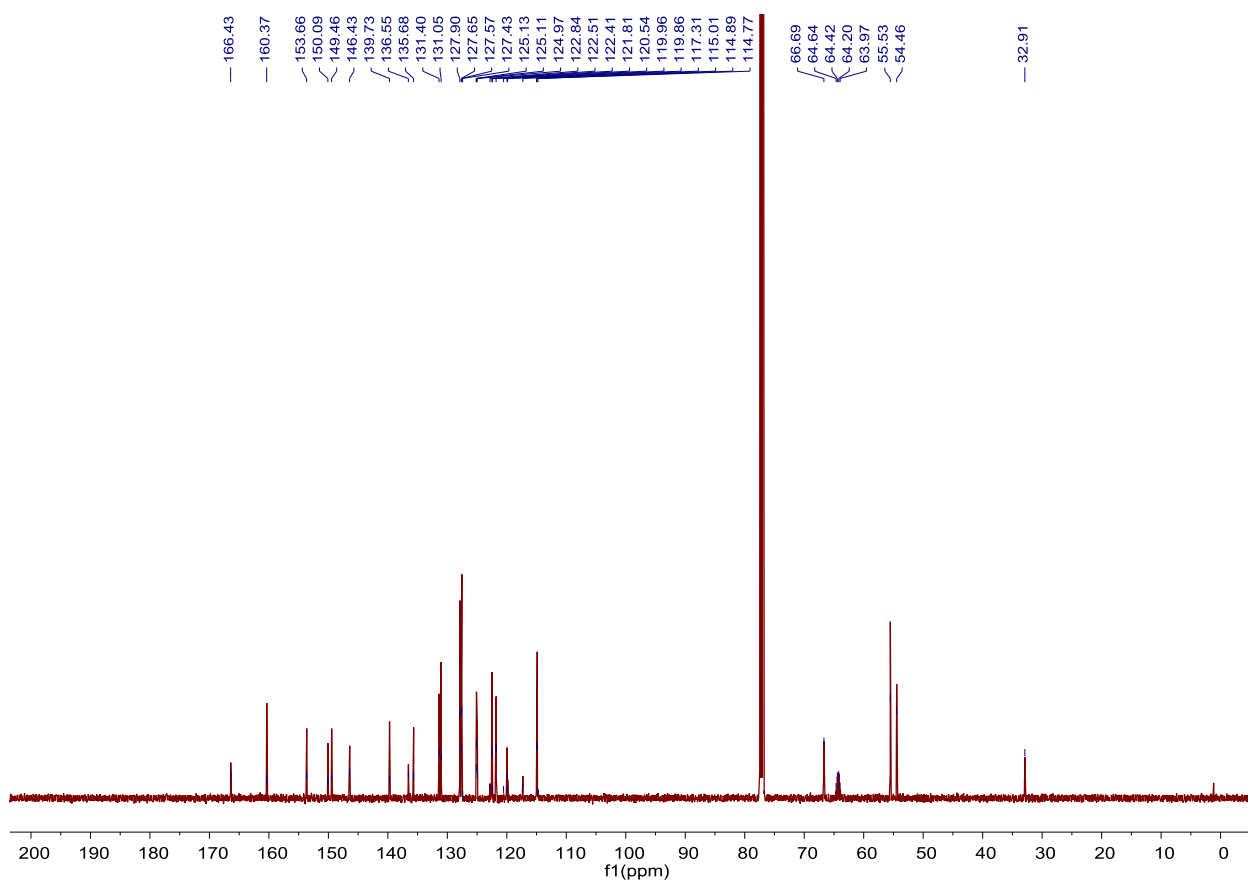

Figure S62.  $^{13}\text{C}$  spectrum of **4j** in  $\text{CDCl}_3$

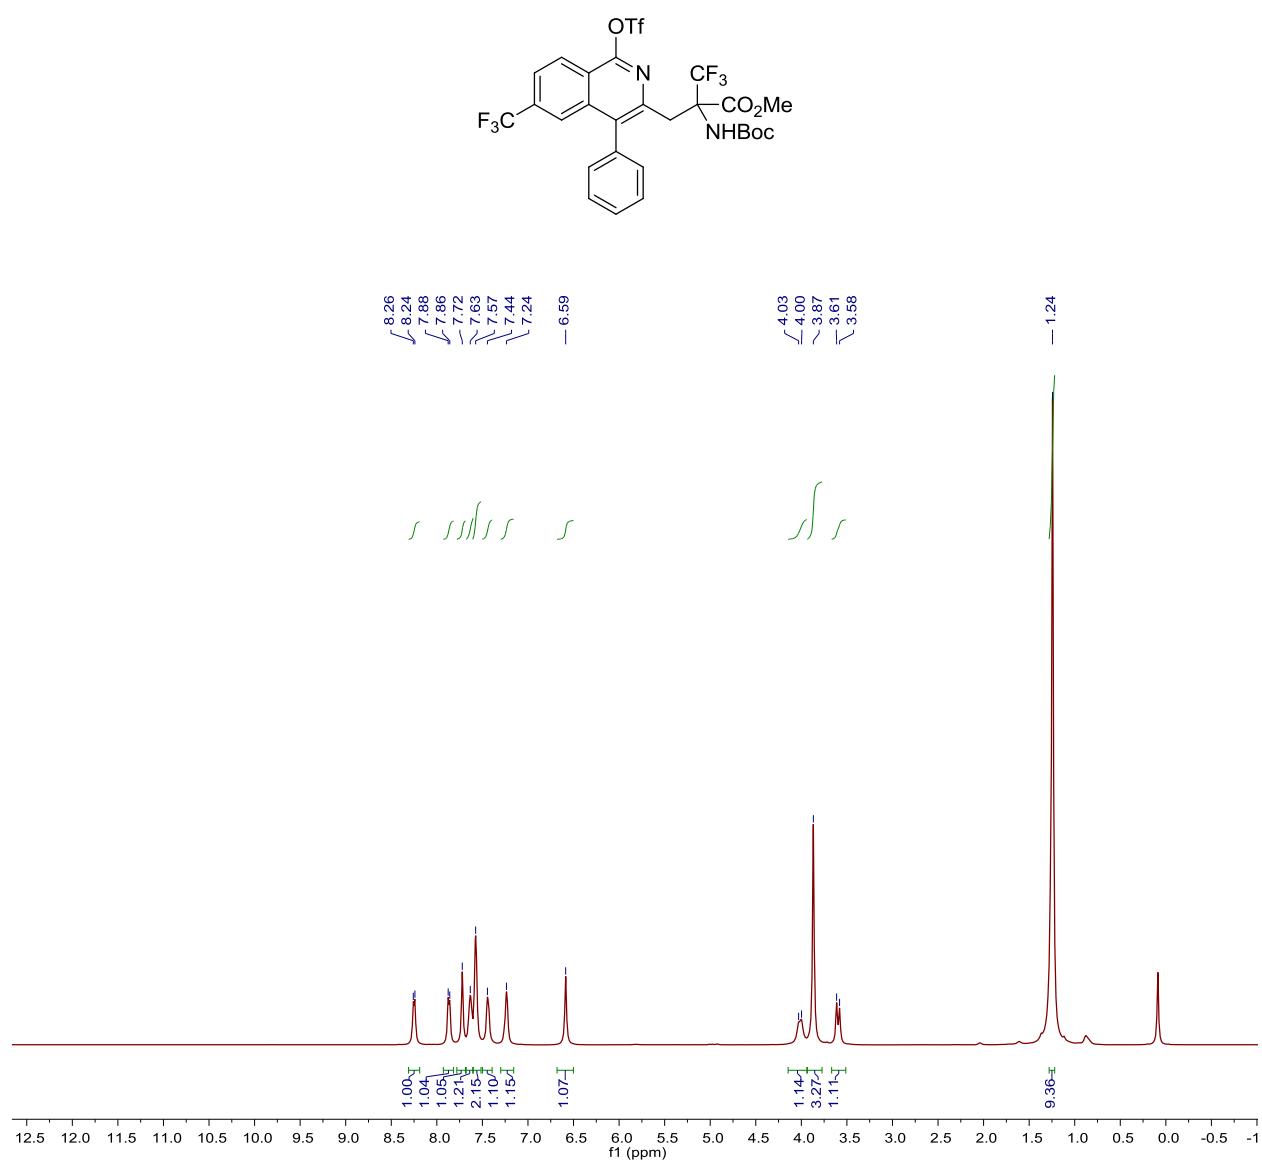

Figure S63.  $^1\text{H}$  spectrum of **4k** in  $\text{CDCl}_3$

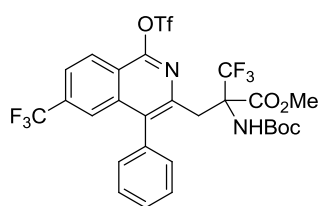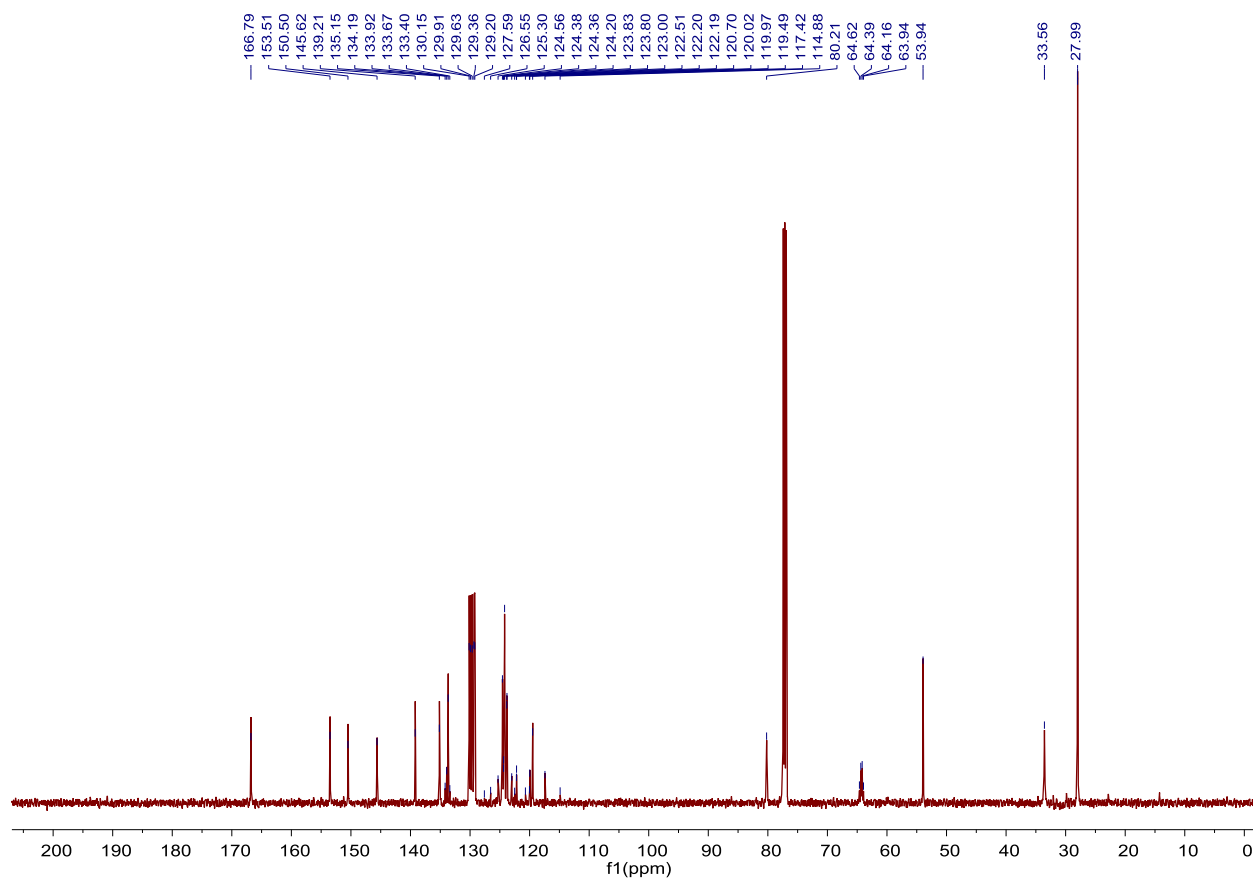

Figure S64.  $^{13}\text{C}$  spectrum of **4k** in  $\text{CDCl}_3$



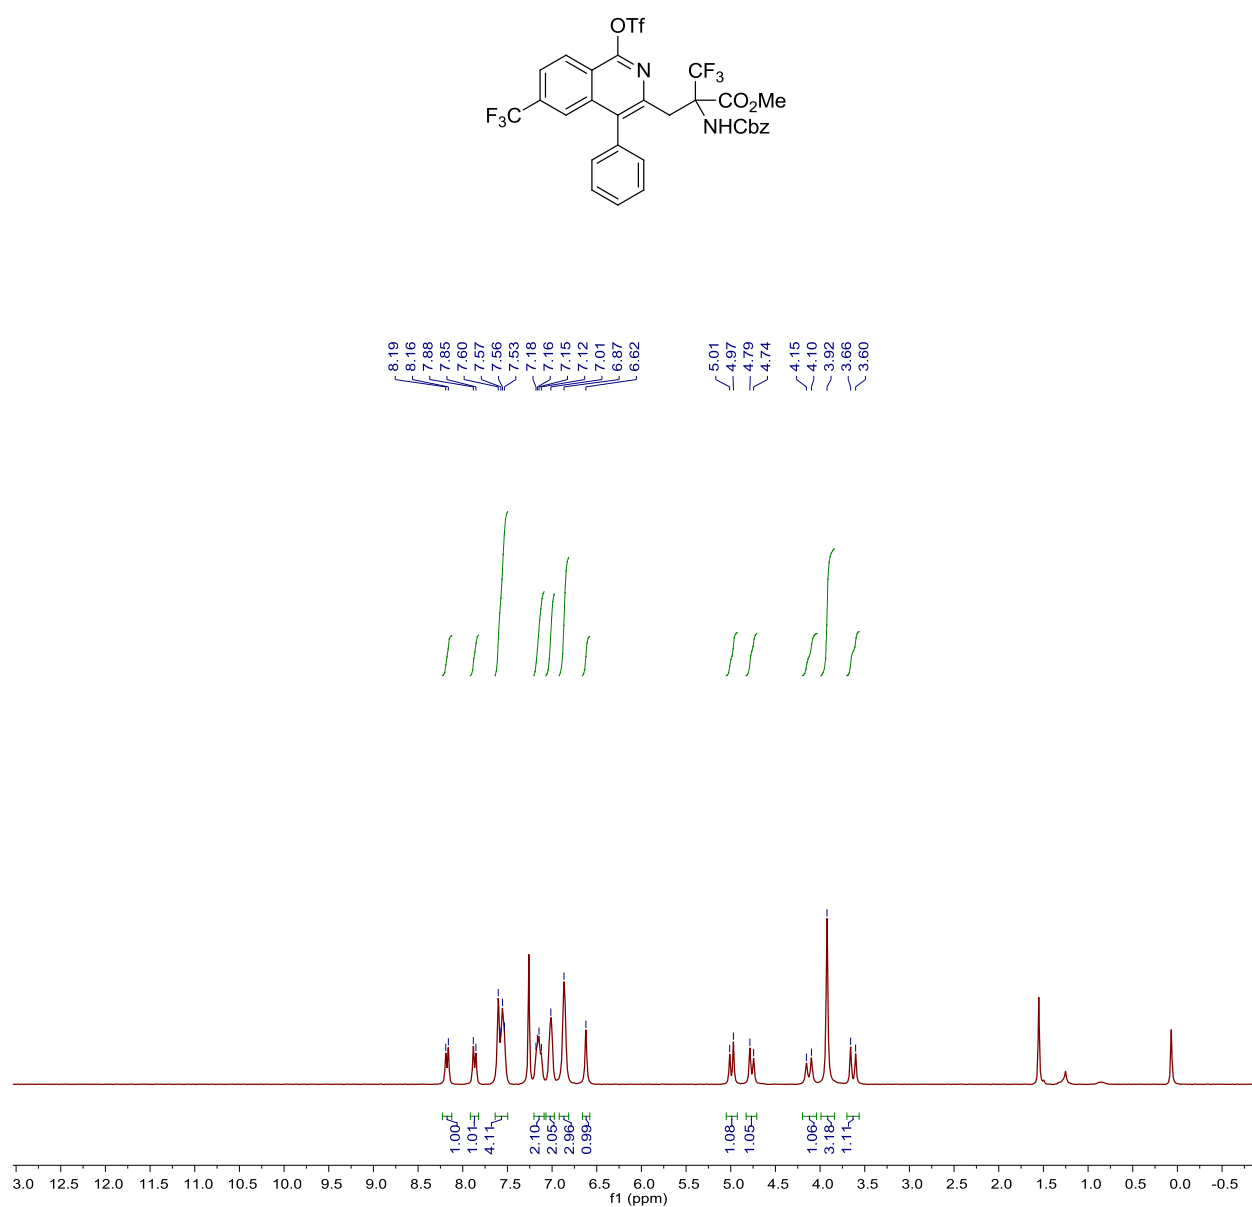

Figure S65.  $^1\text{H}$  spectrum of **4l** in CDCl<sub>3</sub>

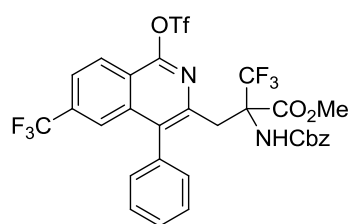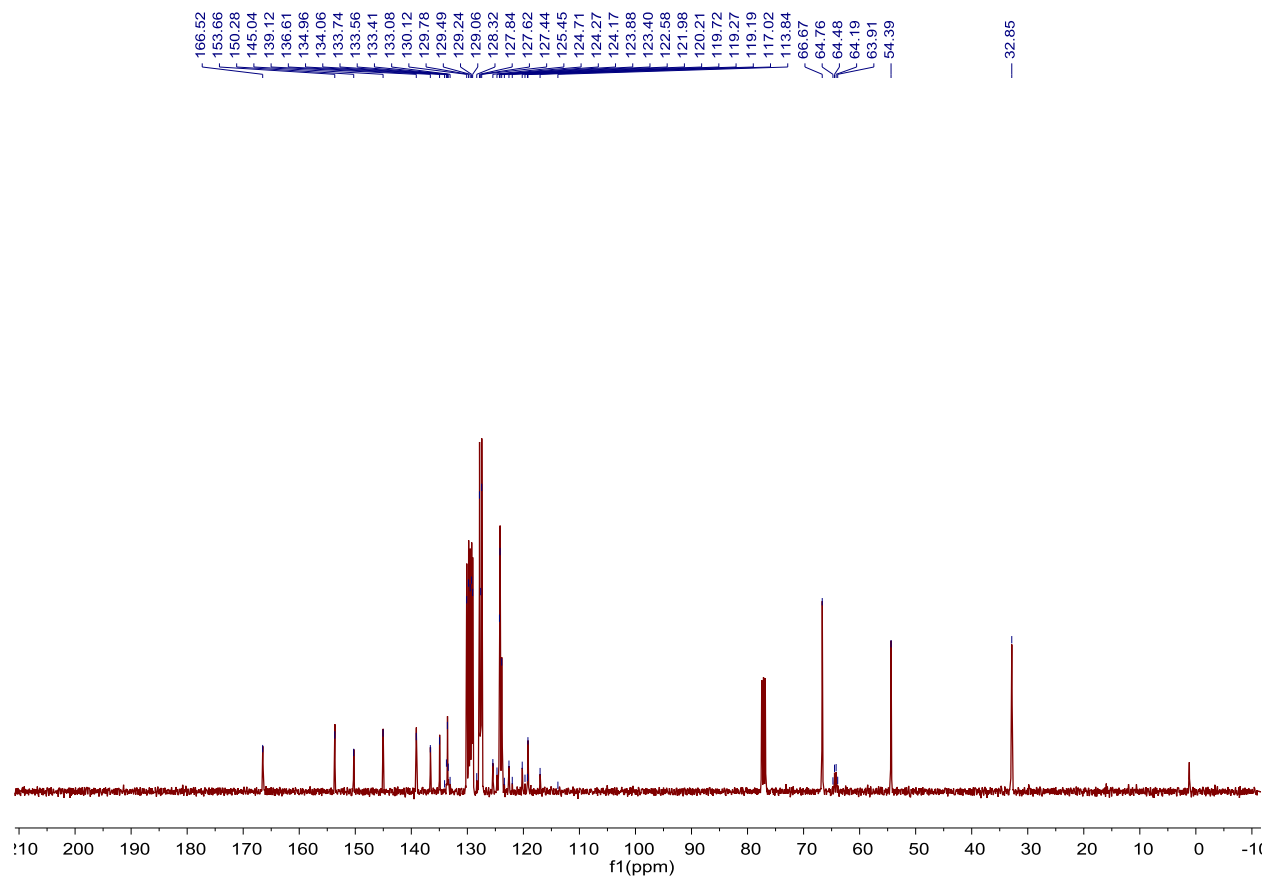

Figure S66.  $^{13}\text{C}$  spectrum of **4l** in  $\text{CDCl}_3$

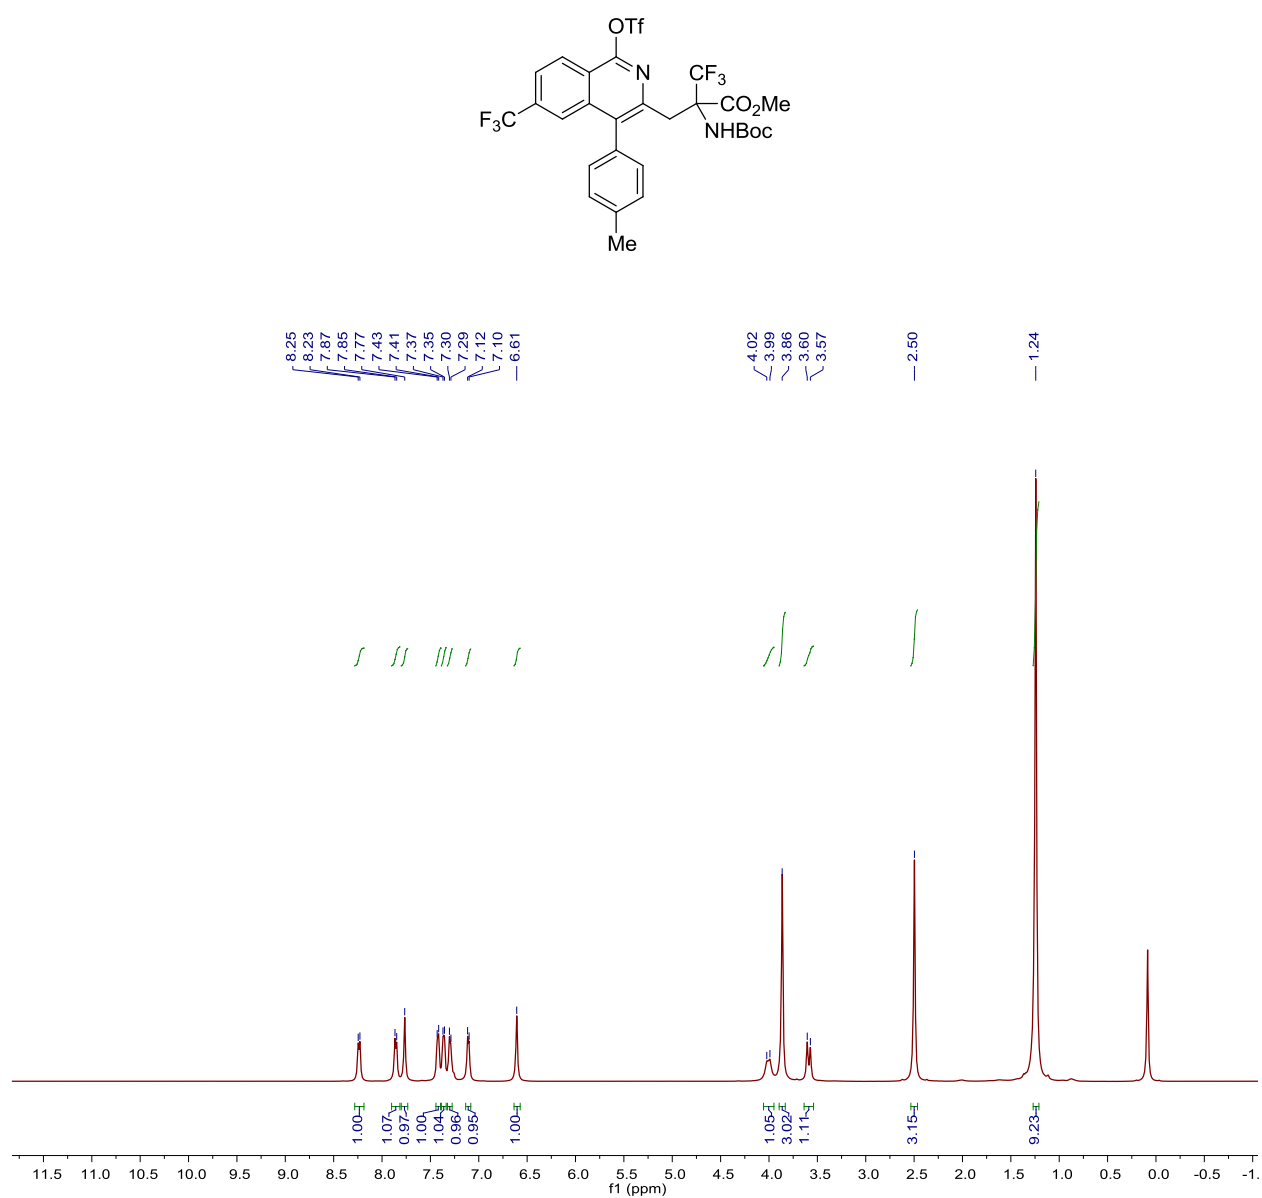

Figure S67.  $^1\text{H}$  spectrum of **4m** in  $\text{CDCl}_3$

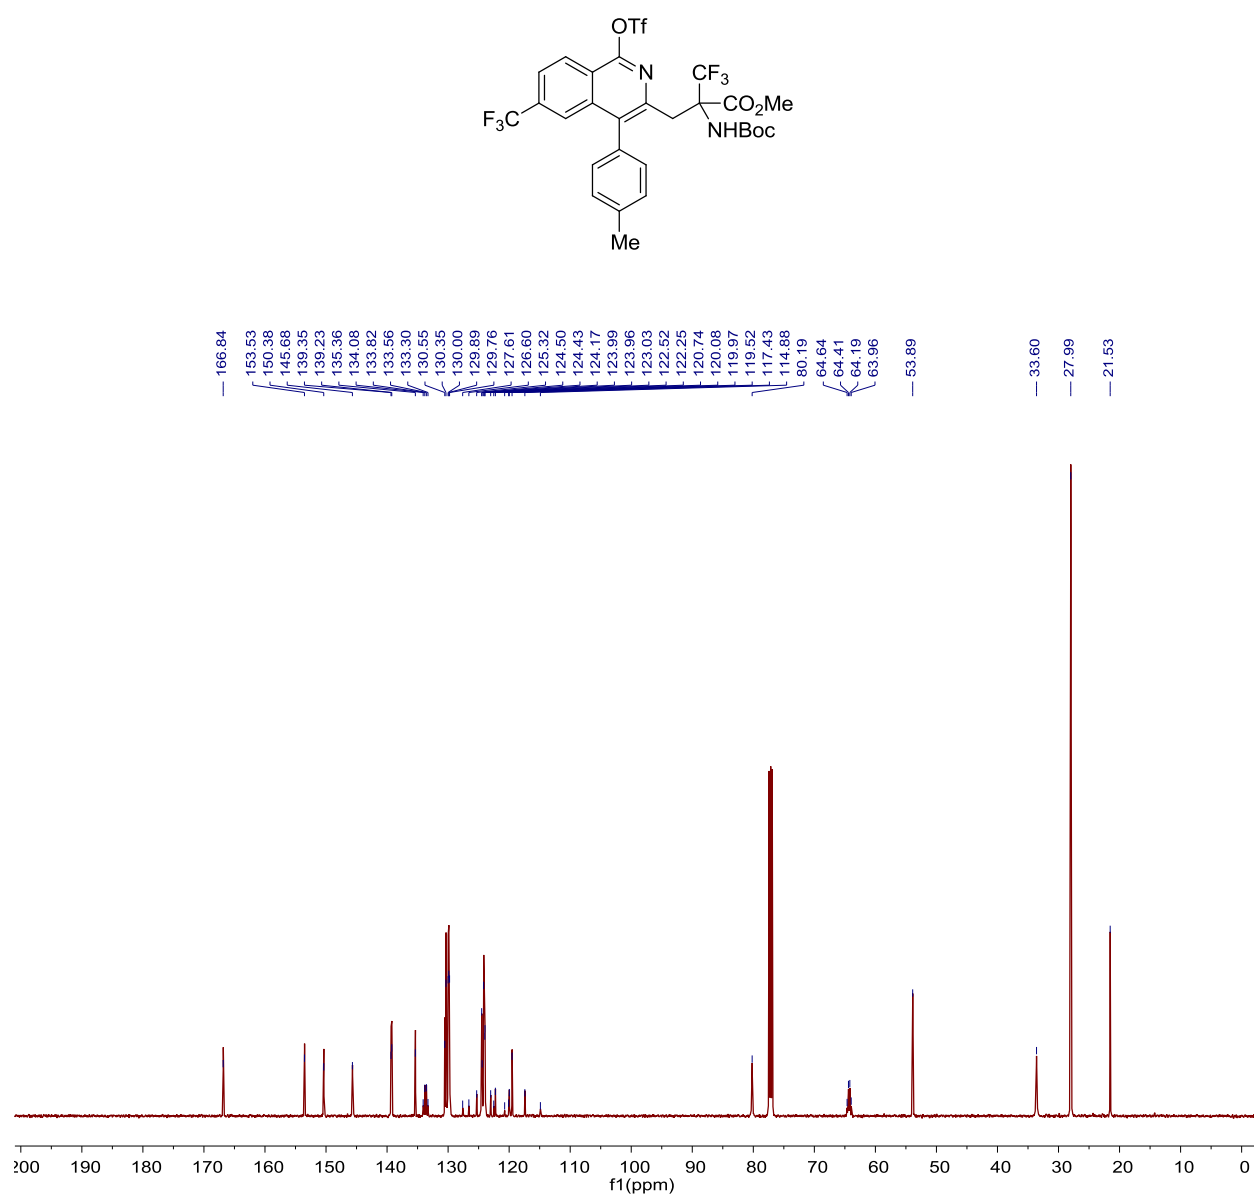

Figure S68.  $^{13}\text{C}$  spectrum of **4m** in CDCl<sub>3</sub>

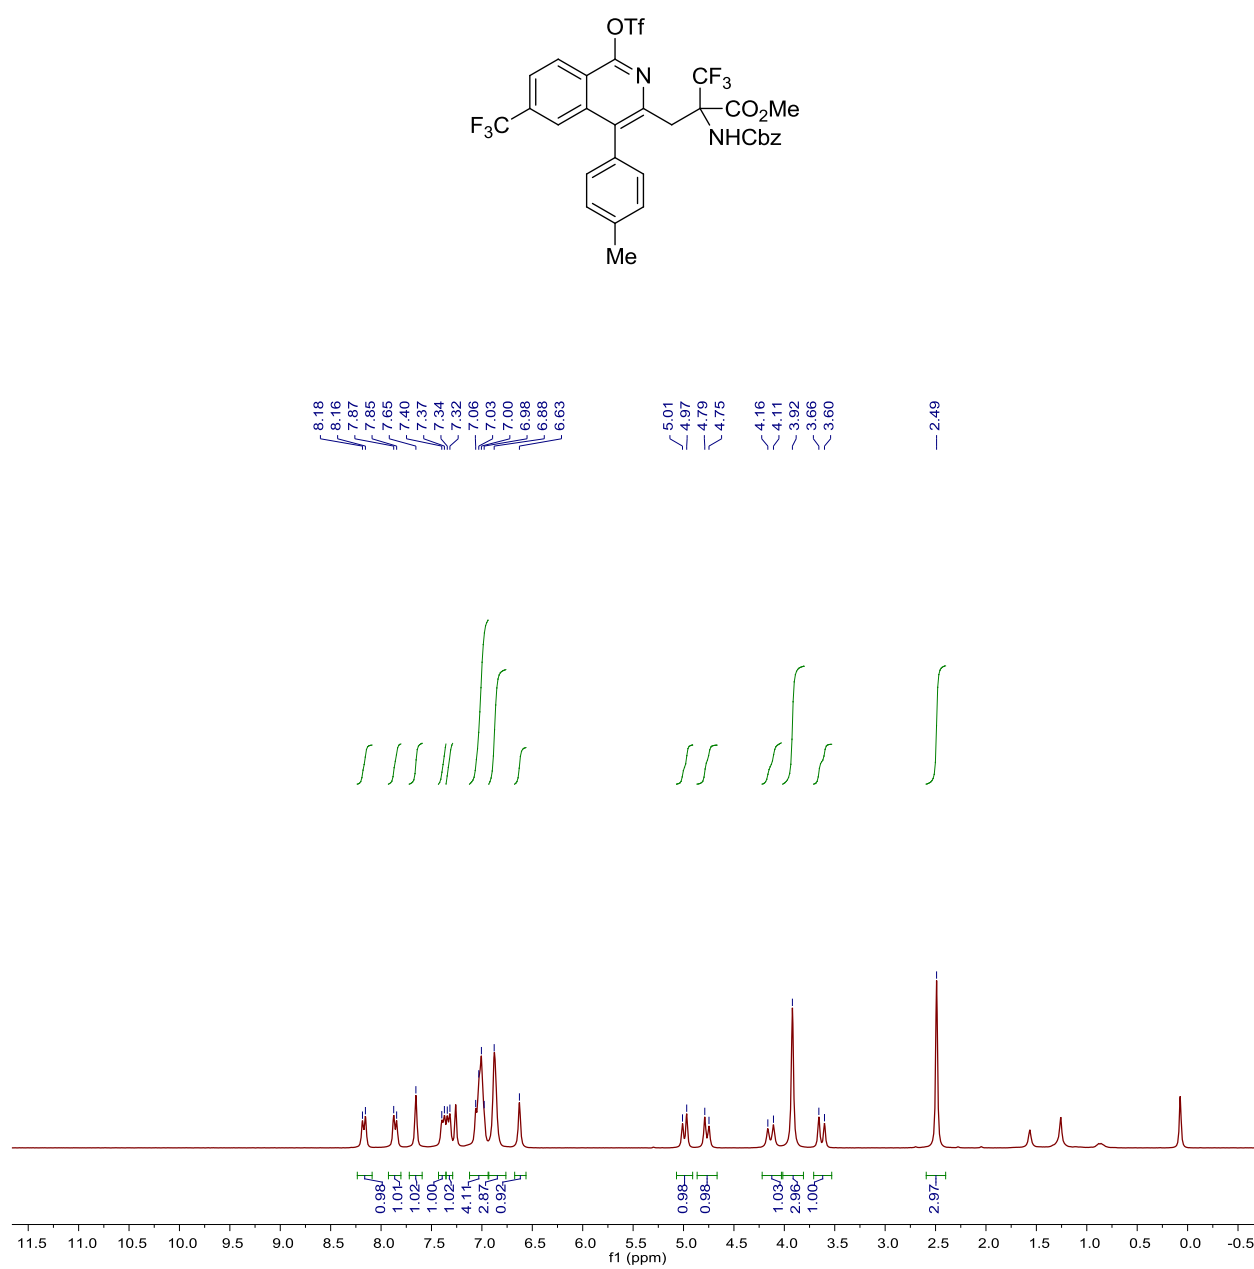

Figure S69.  $^1\text{H}$  spectrum of **4n** in CDCl<sub>3</sub>

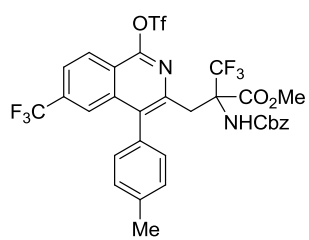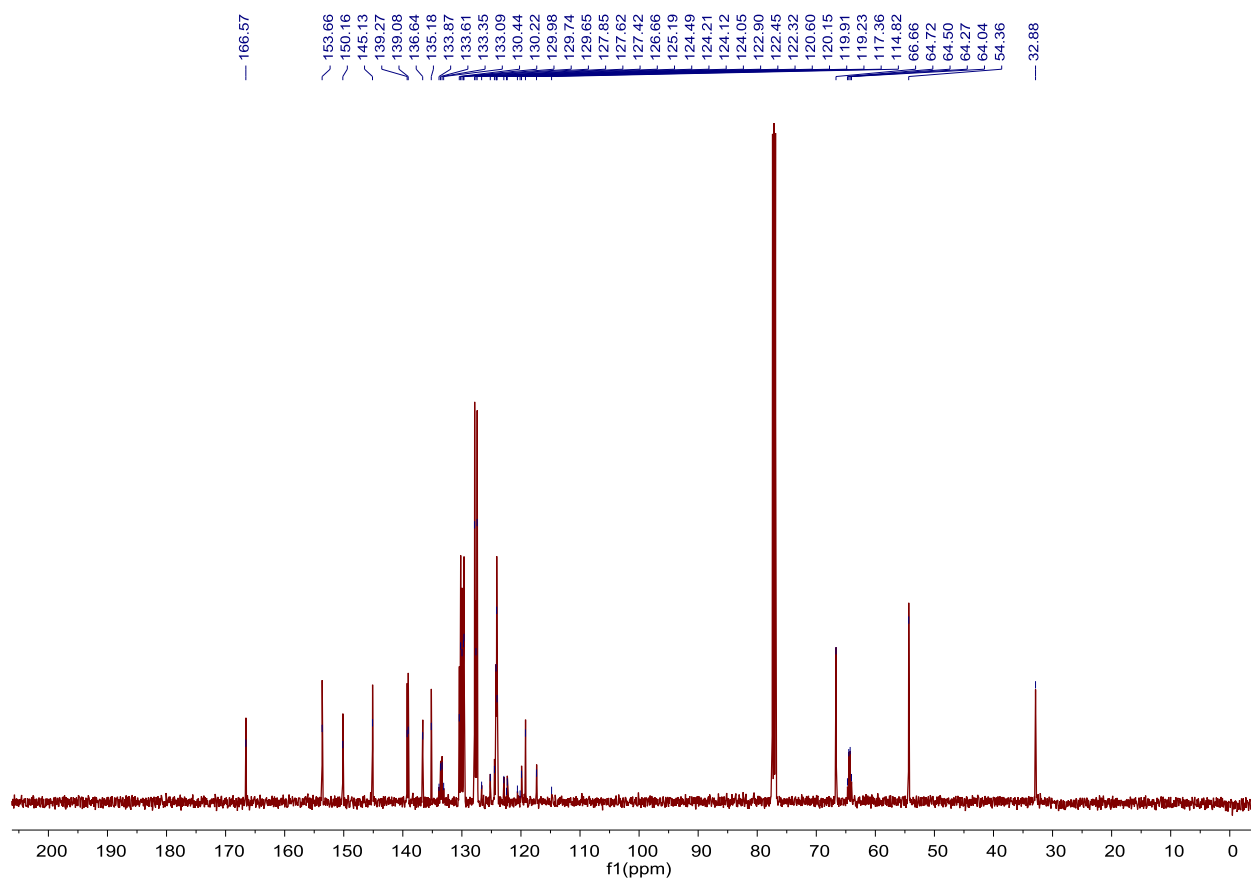

Figure S70.  $^{13}\text{C}$  spectrum of **4n** in  $\text{CDCl}_3$

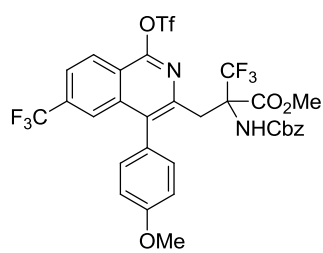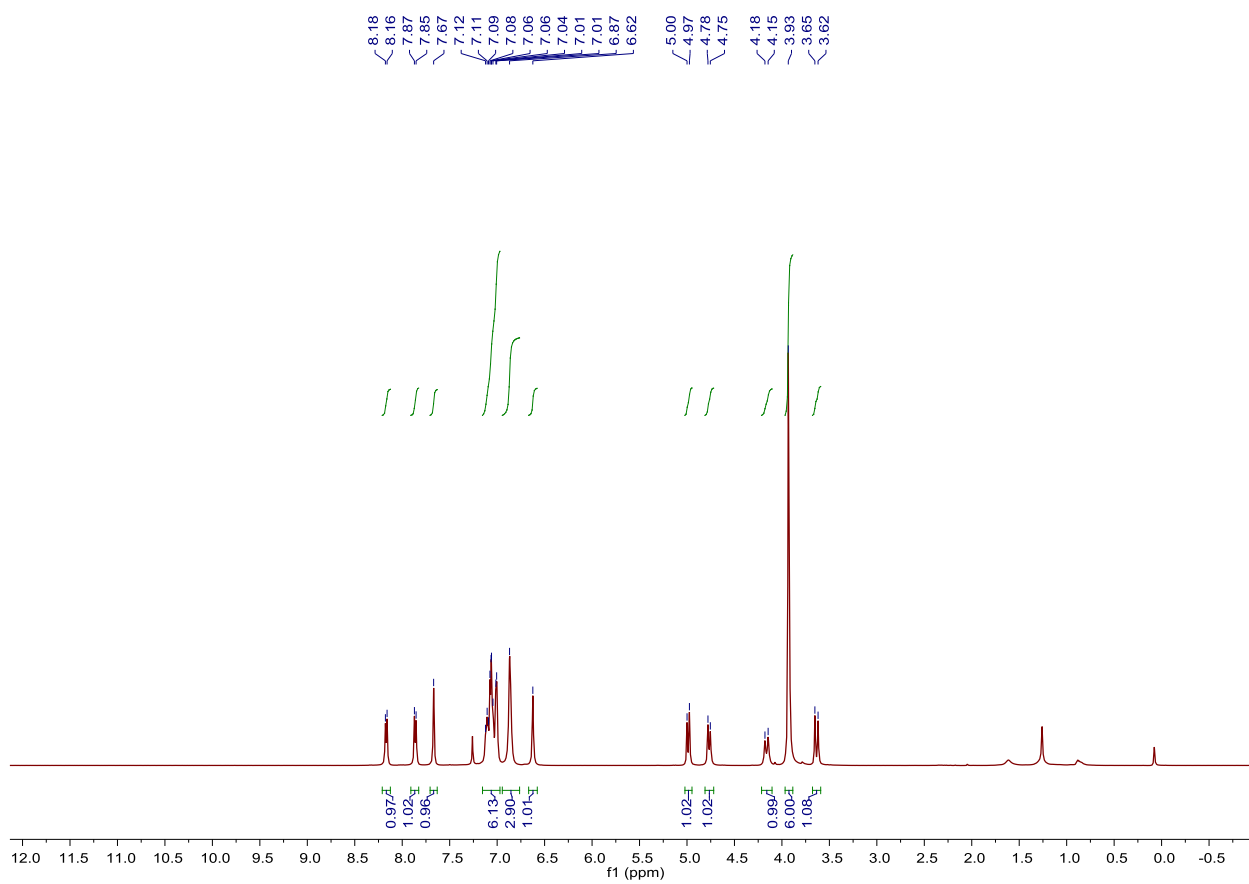

Figure S71.  $^1\text{H}$  spectrum of **4o** in  $\text{CDCl}_3$

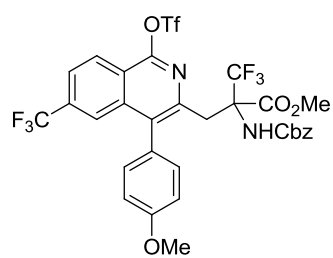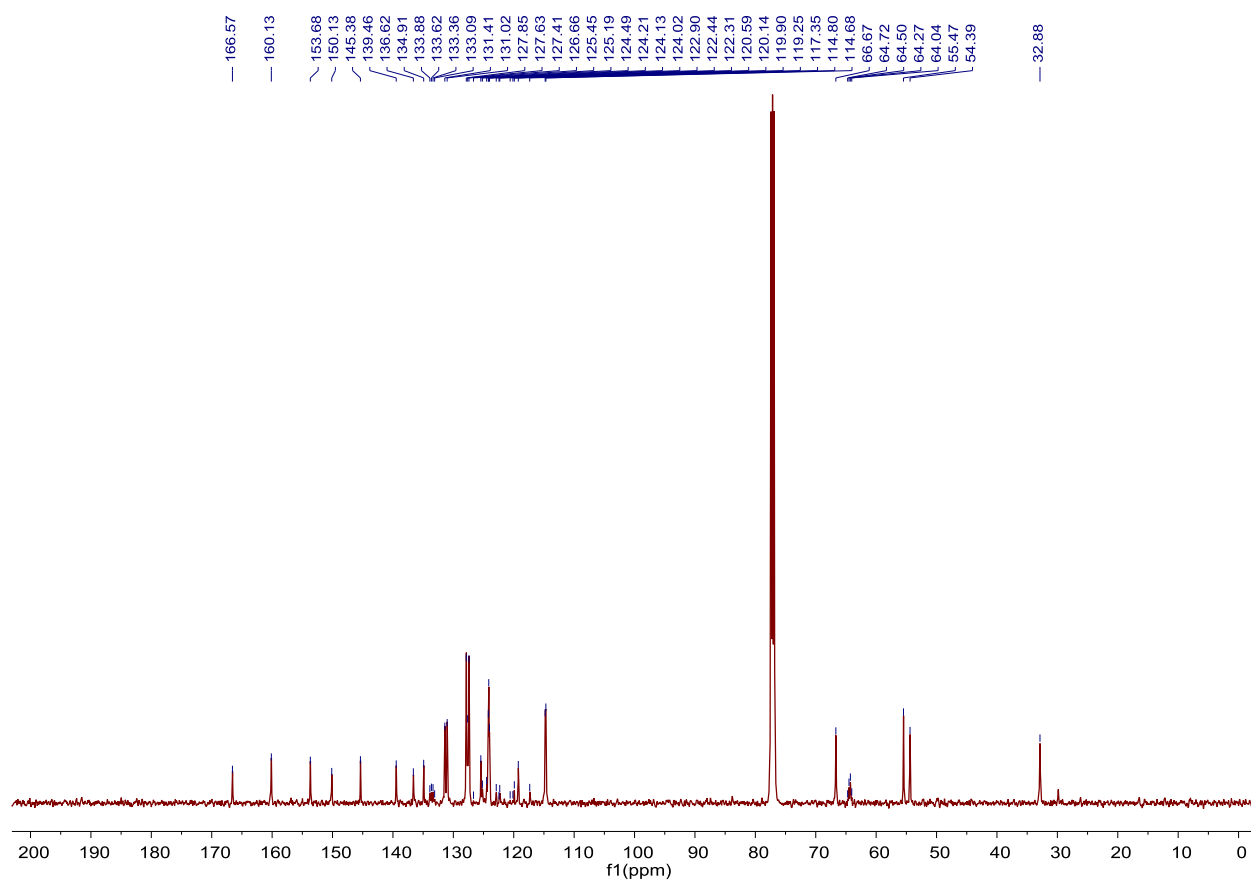

Figure S72.  $^{13}\text{C}$  spectrum of **40** in  $\text{CDCl}_3$



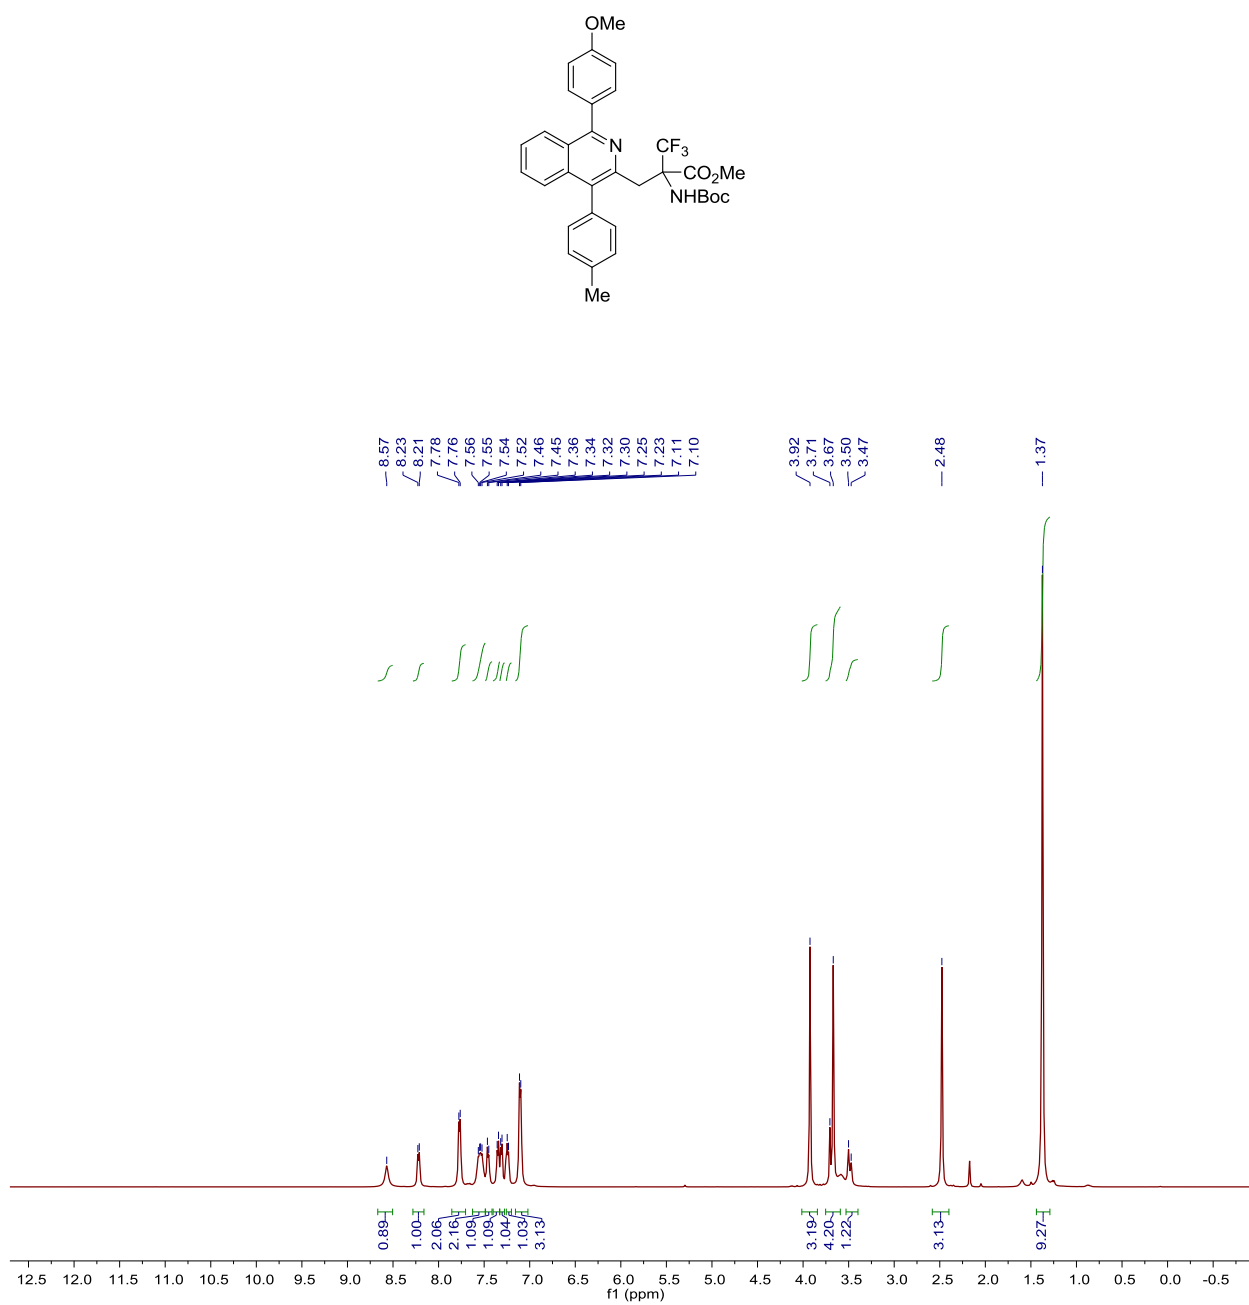

Figure S73.  $^1\text{H}$  spectrum of **5a** in CDCl<sub>3</sub>

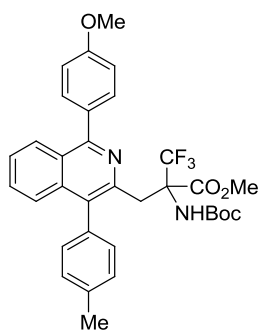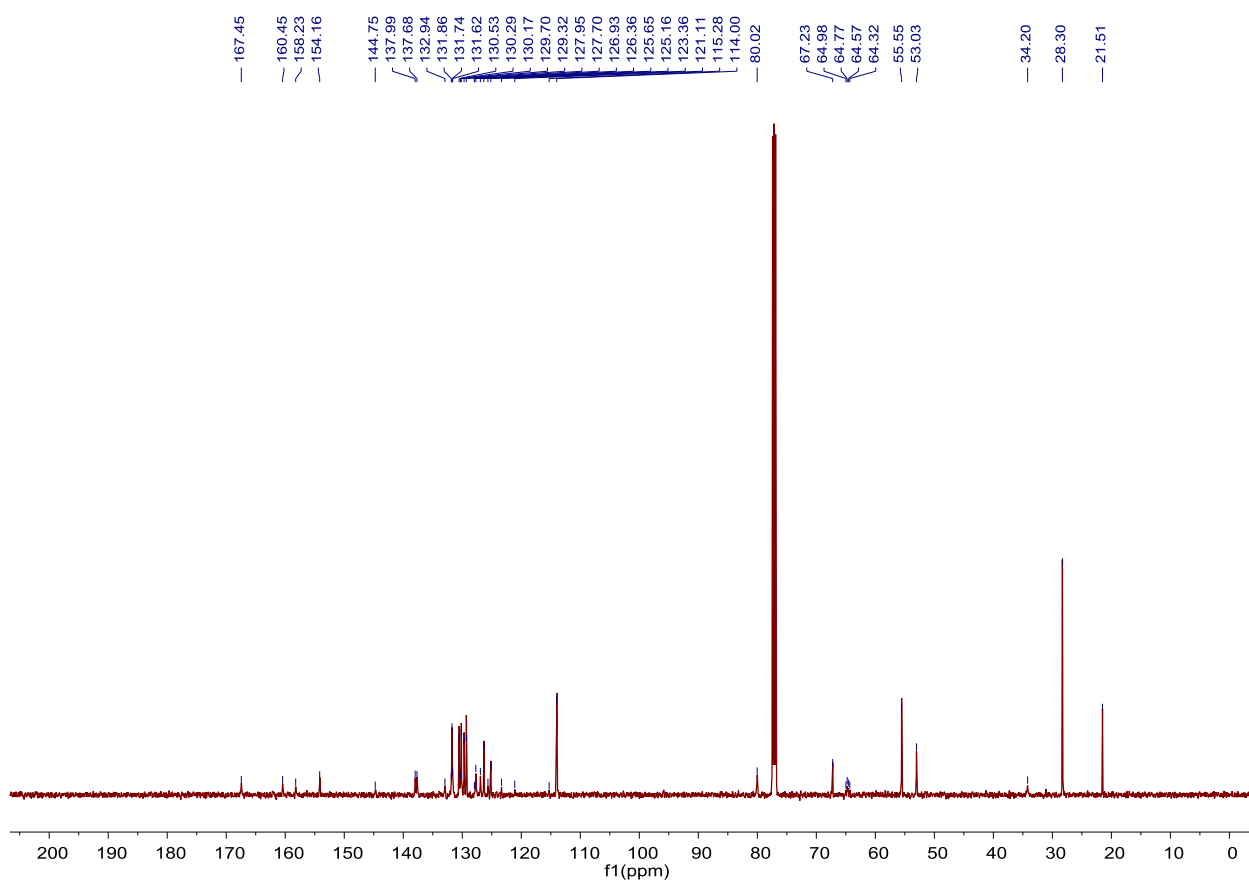

Figure S74.  $^{13}\text{C}$  spectrum of **5a** in  $\text{CDCl}_3$

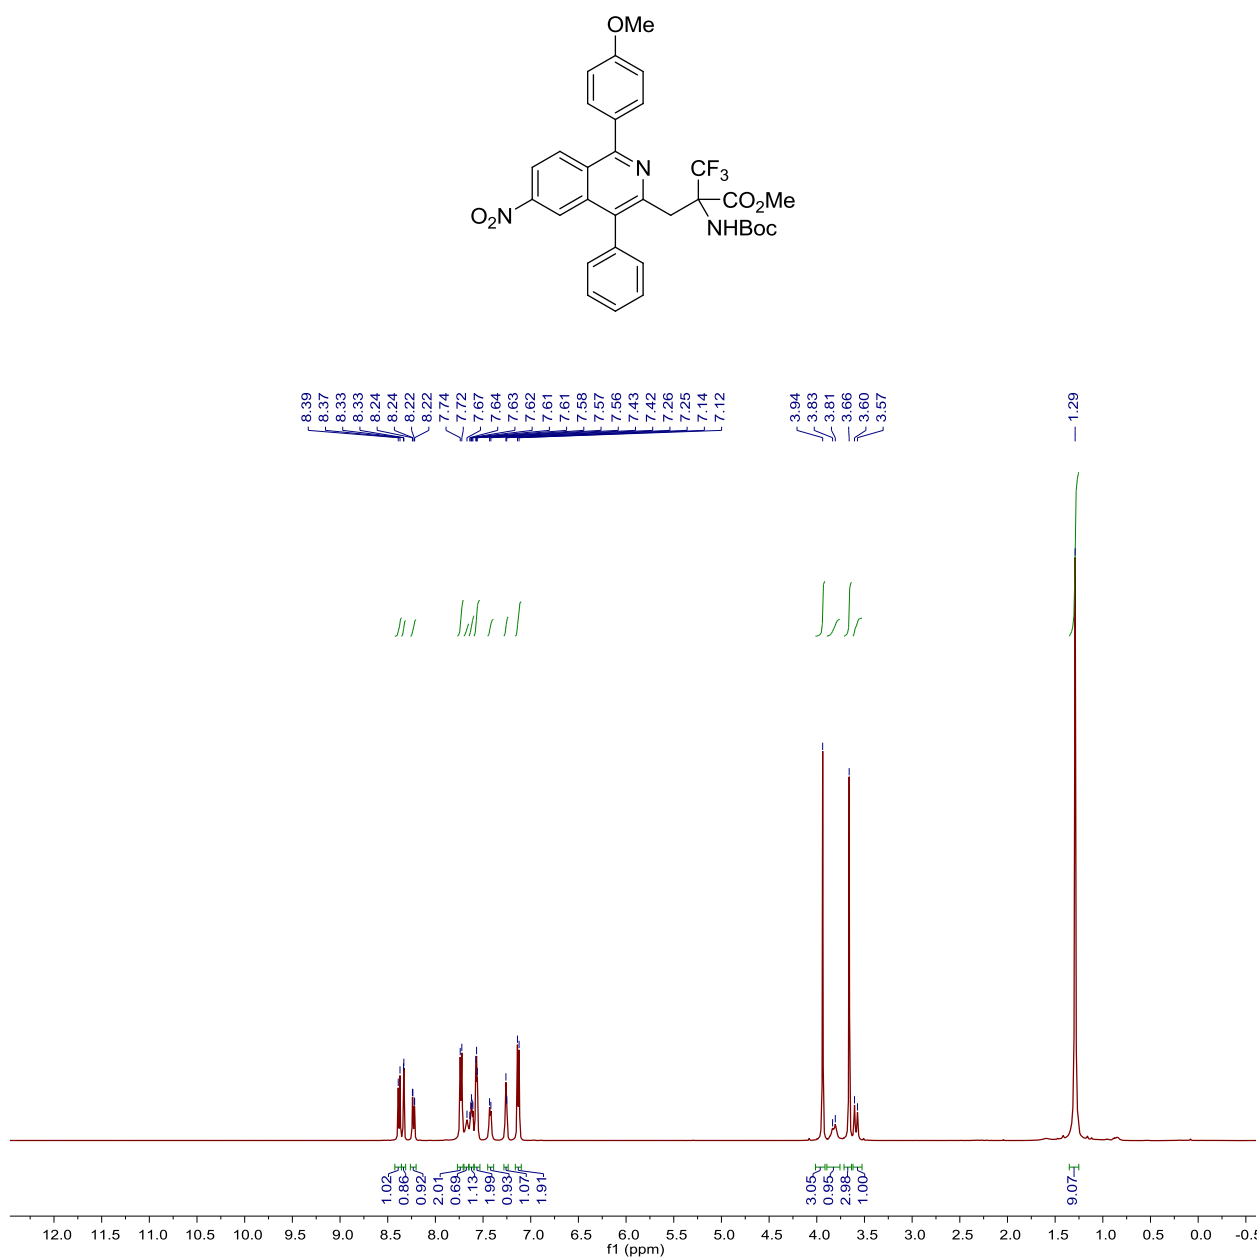

Figure S75. <sup>1</sup>H spectrum of **5b** in CDCl<sub>3</sub>

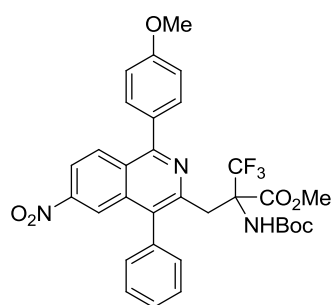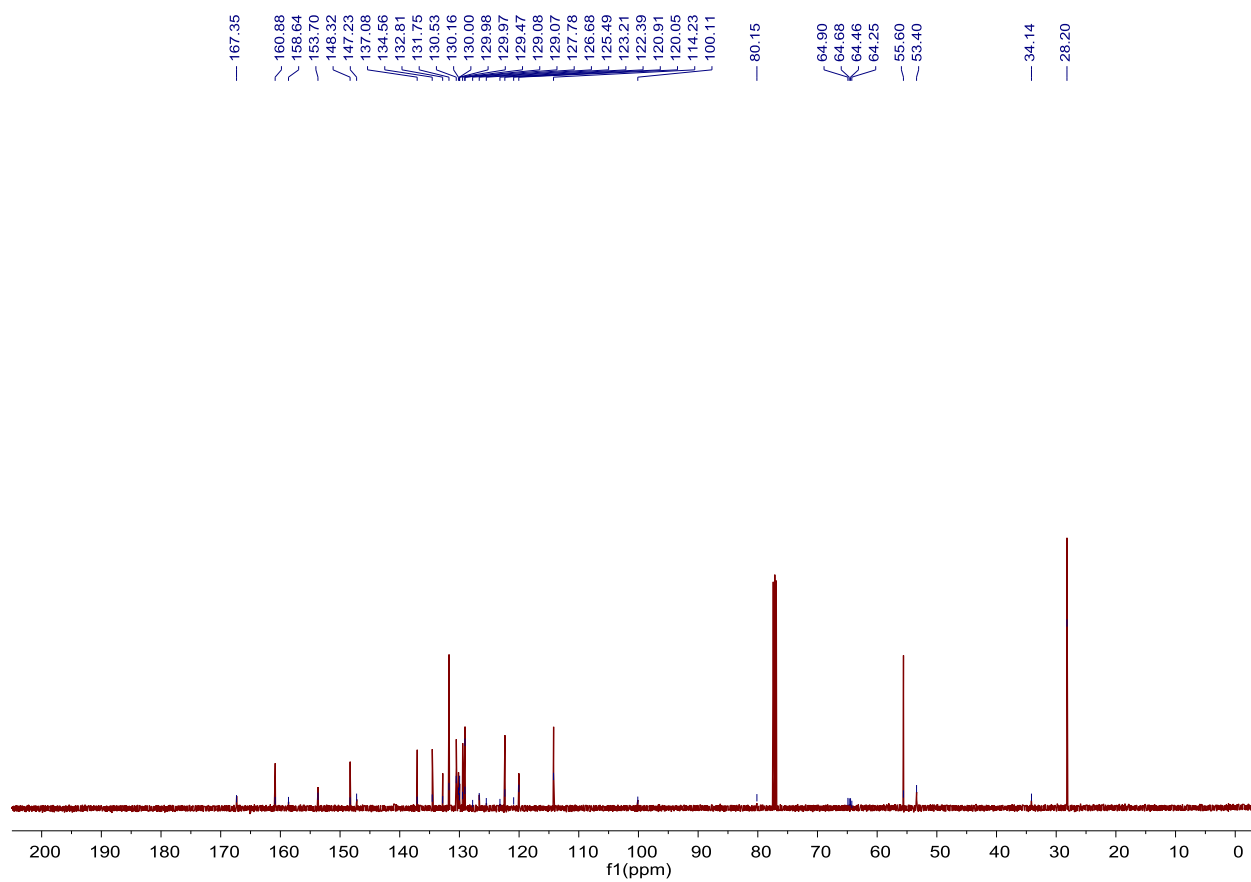

Figure S76.  $^{13}\text{C}$  spectrum of **5b** in  $\text{CDCl}_3$

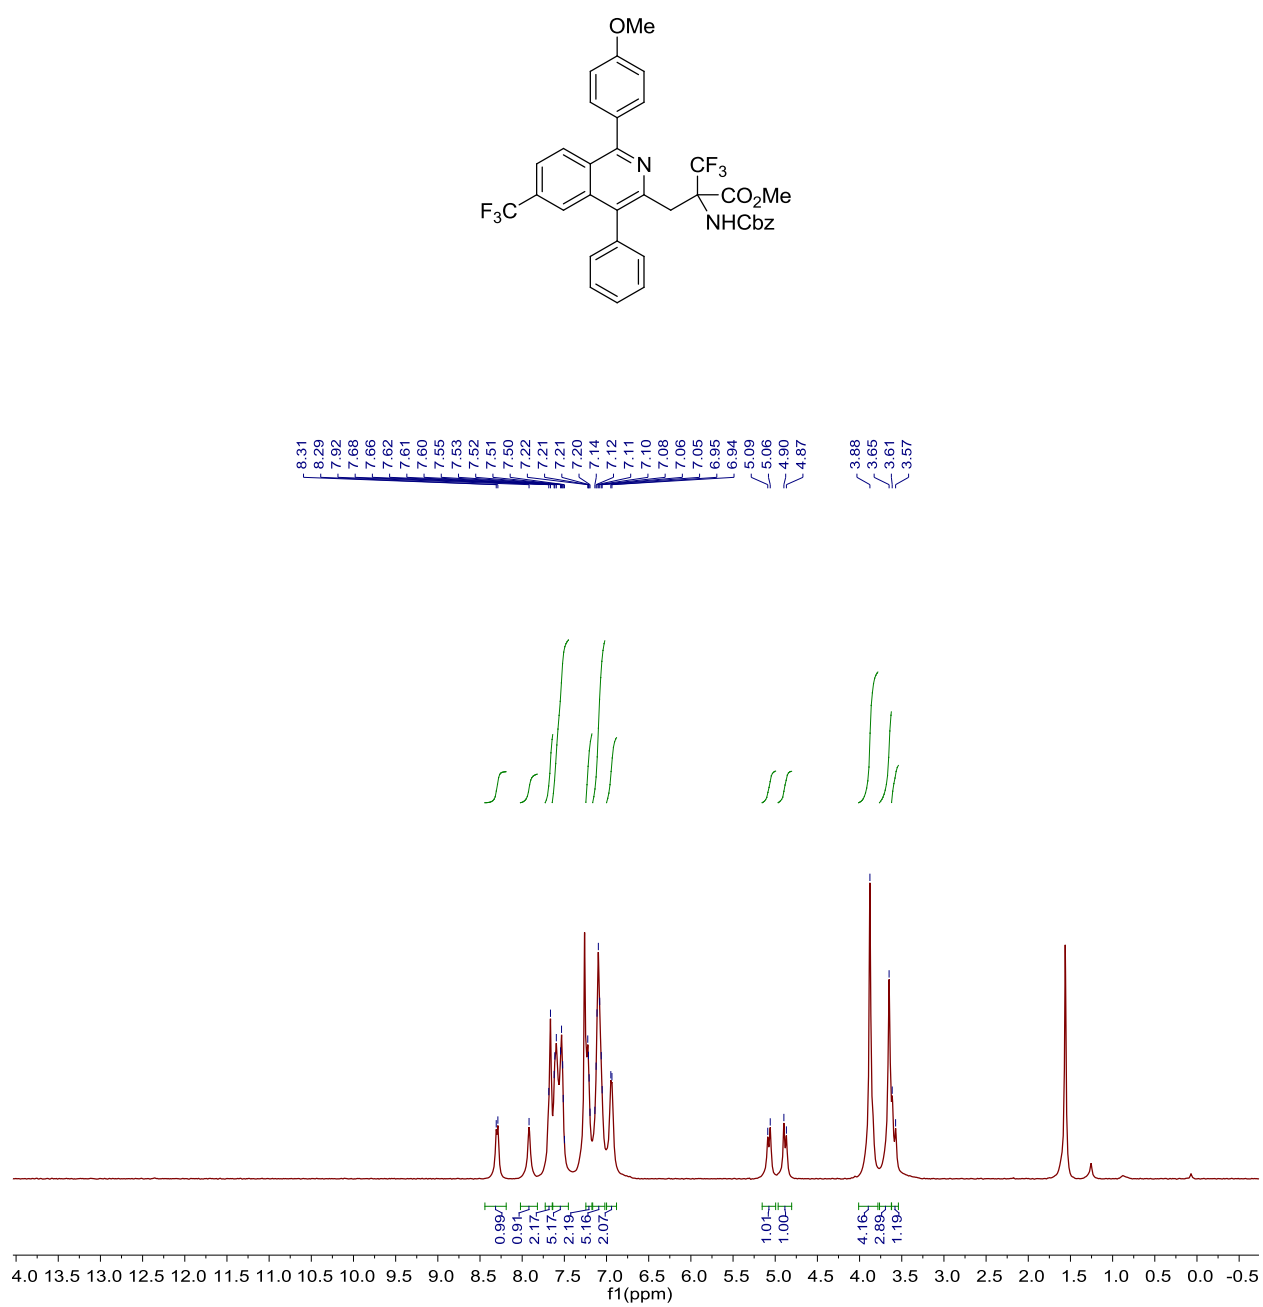

Figure S77. <sup>1</sup>H spectrum of **5c** in CDCl<sub>3</sub>

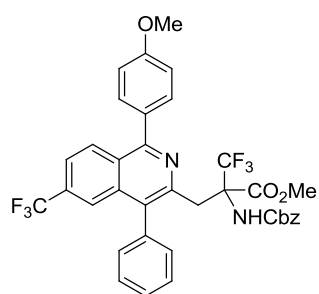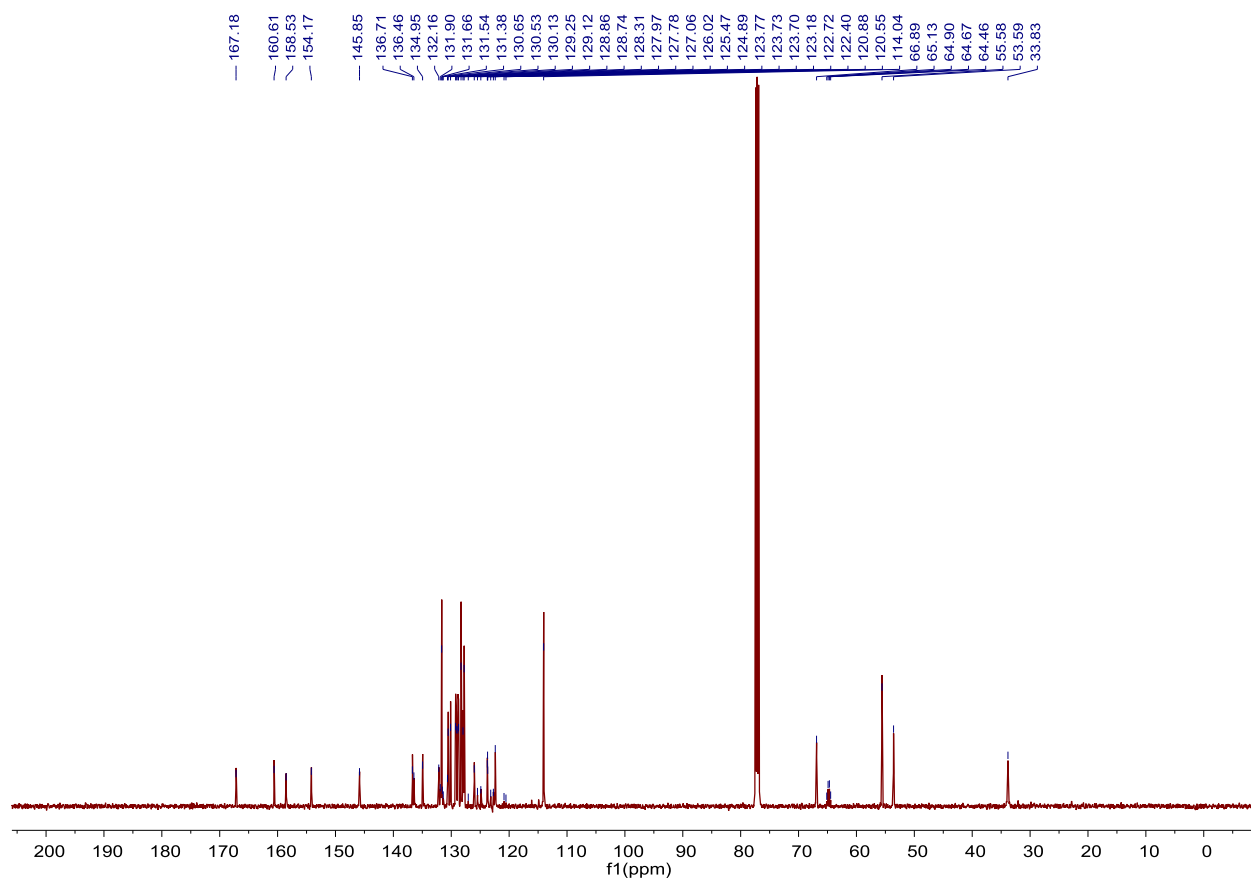

Figure S78.  $^{13}\text{C}$  spectrum of **5c** in  $\text{CDCl}_3$

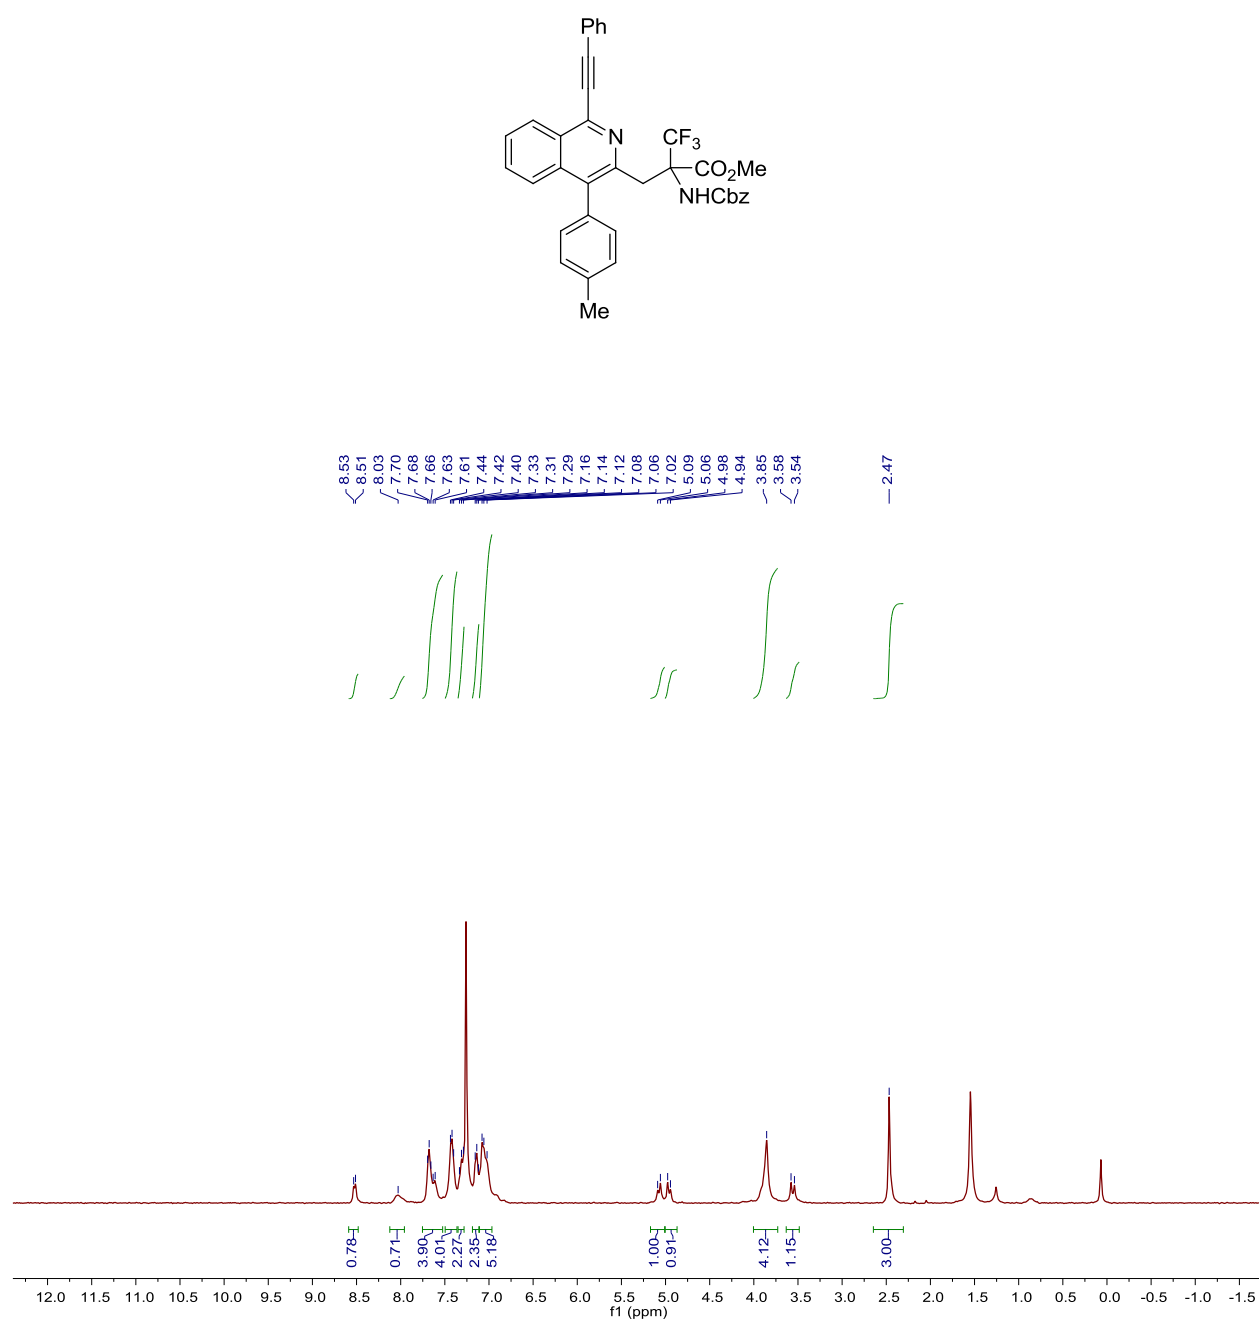

Figure S79.  $^1\text{H}$  spectrum of **6a** in CDCl<sub>3</sub>

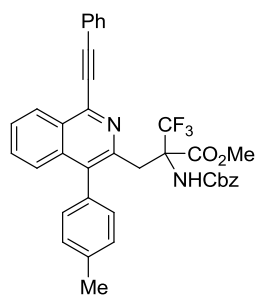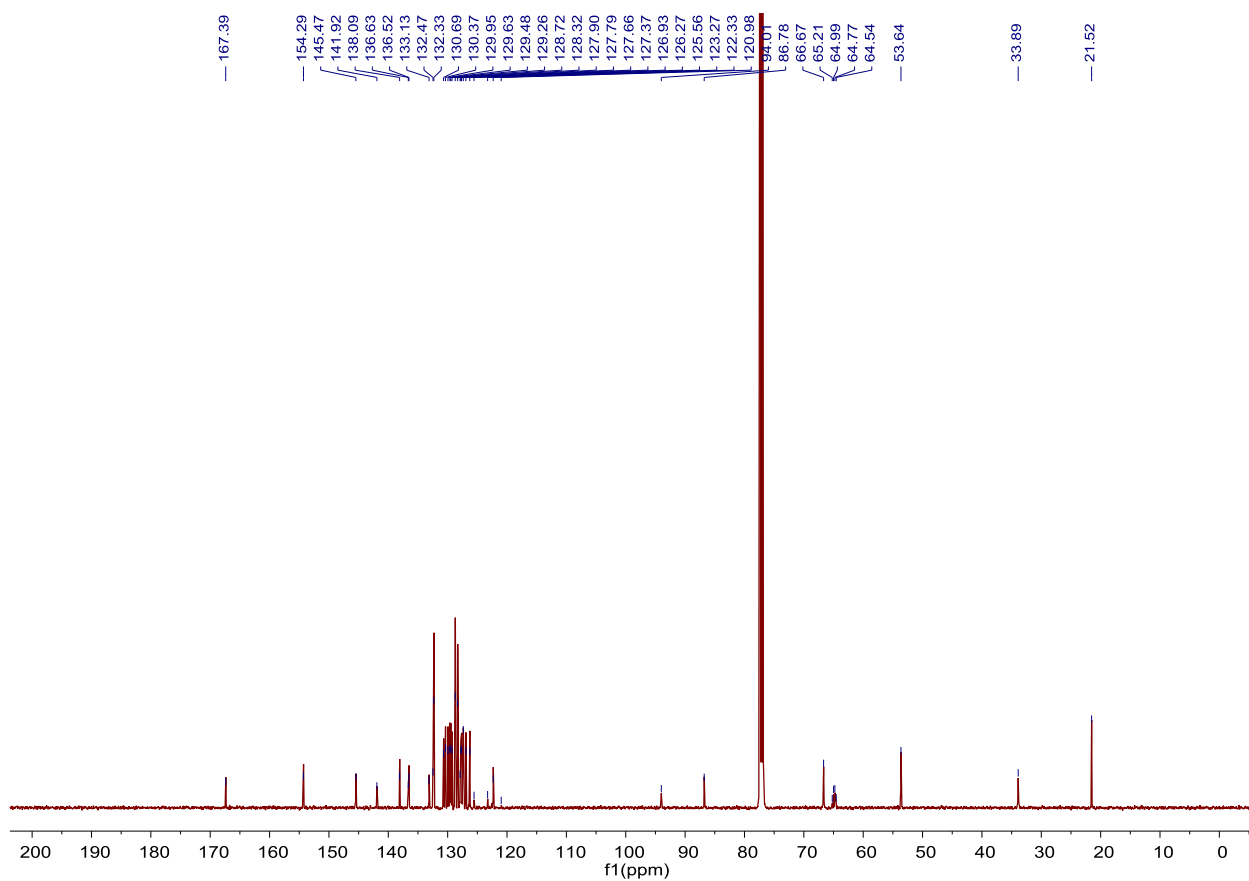

Figure S80.  $^{13}\text{C}$  spectrum of **6a** in  $\text{CDCl}_3$



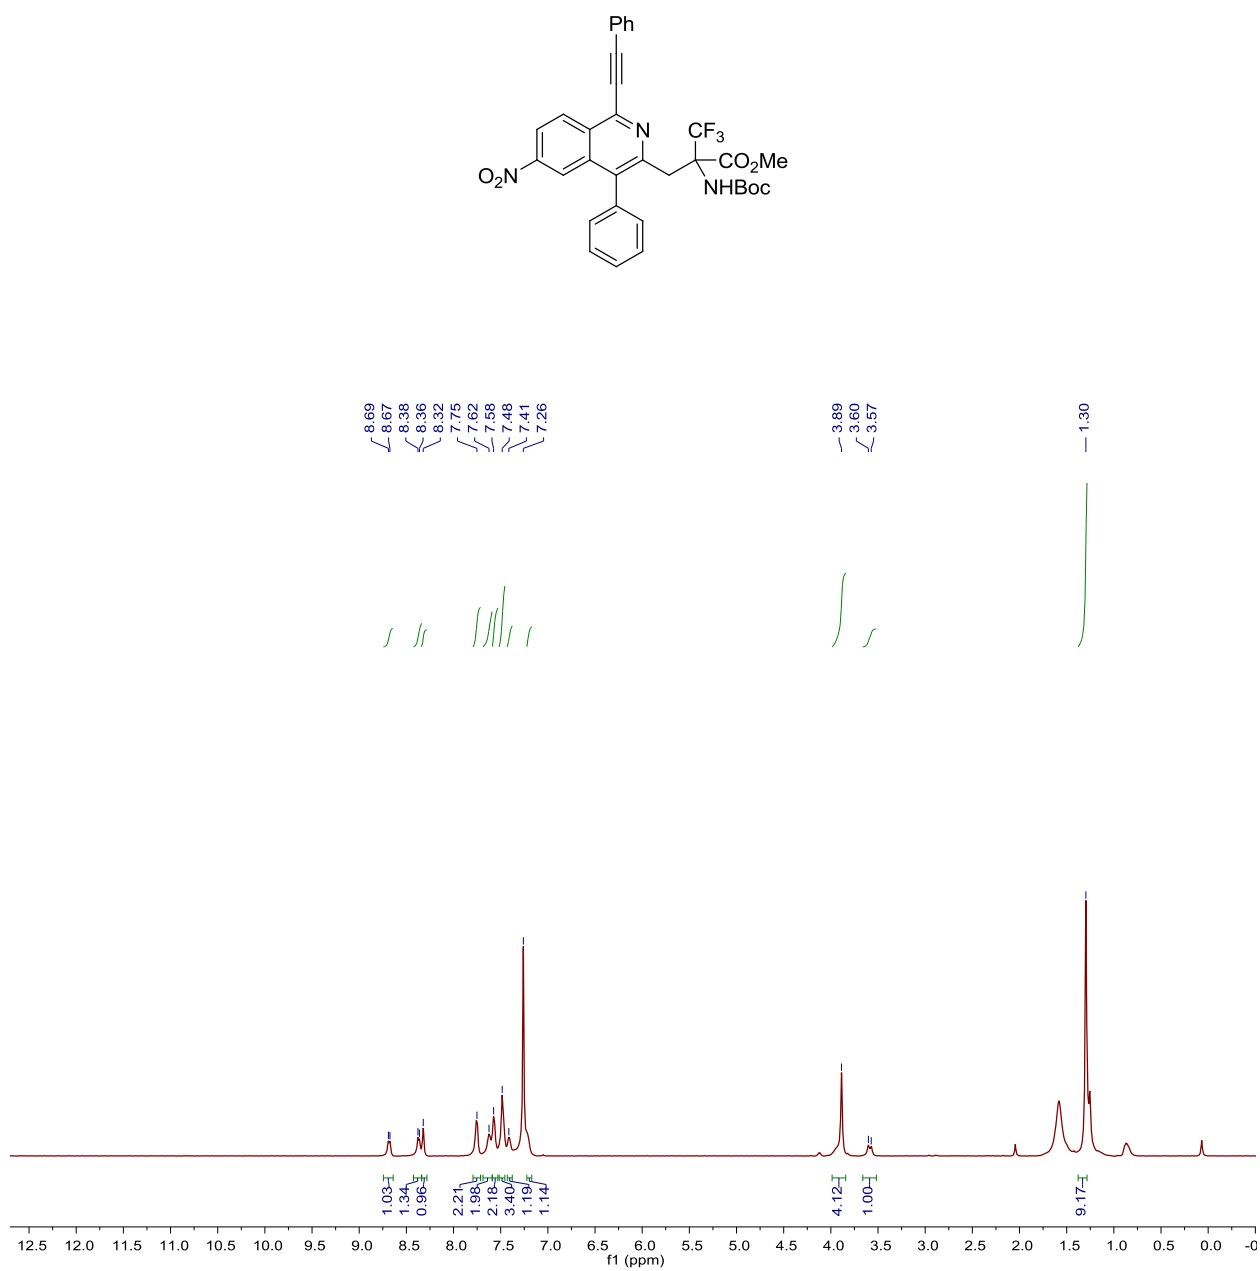

Figure S81.  $^1\text{H}$  spectrum of **6b** in  $\text{CDCl}_3$

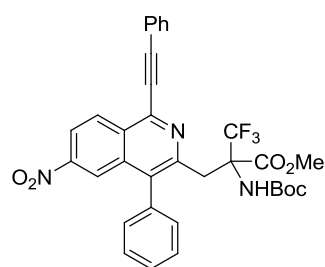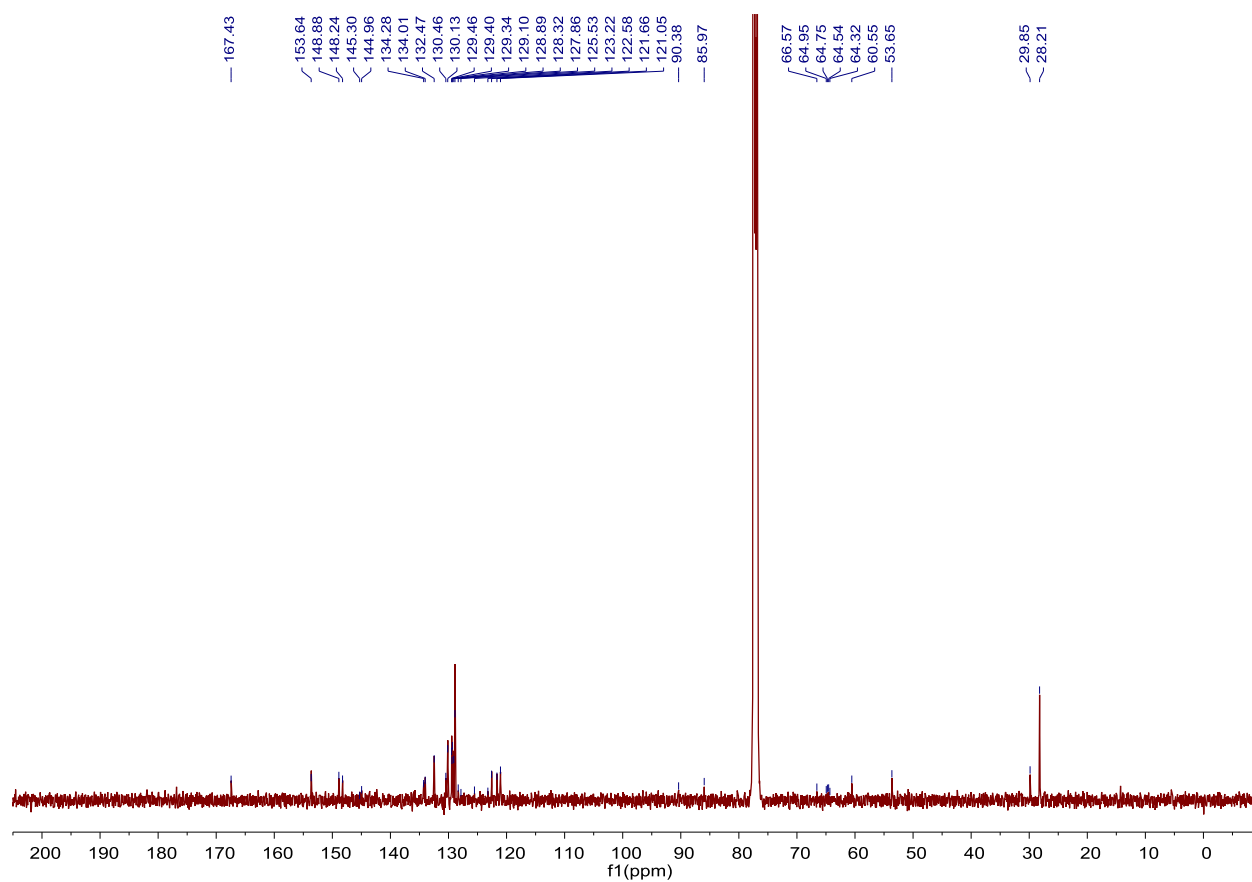

Figure S82.  $^{13}\text{C}$  spectrum of **6b** in  $\text{CDCl}_3$

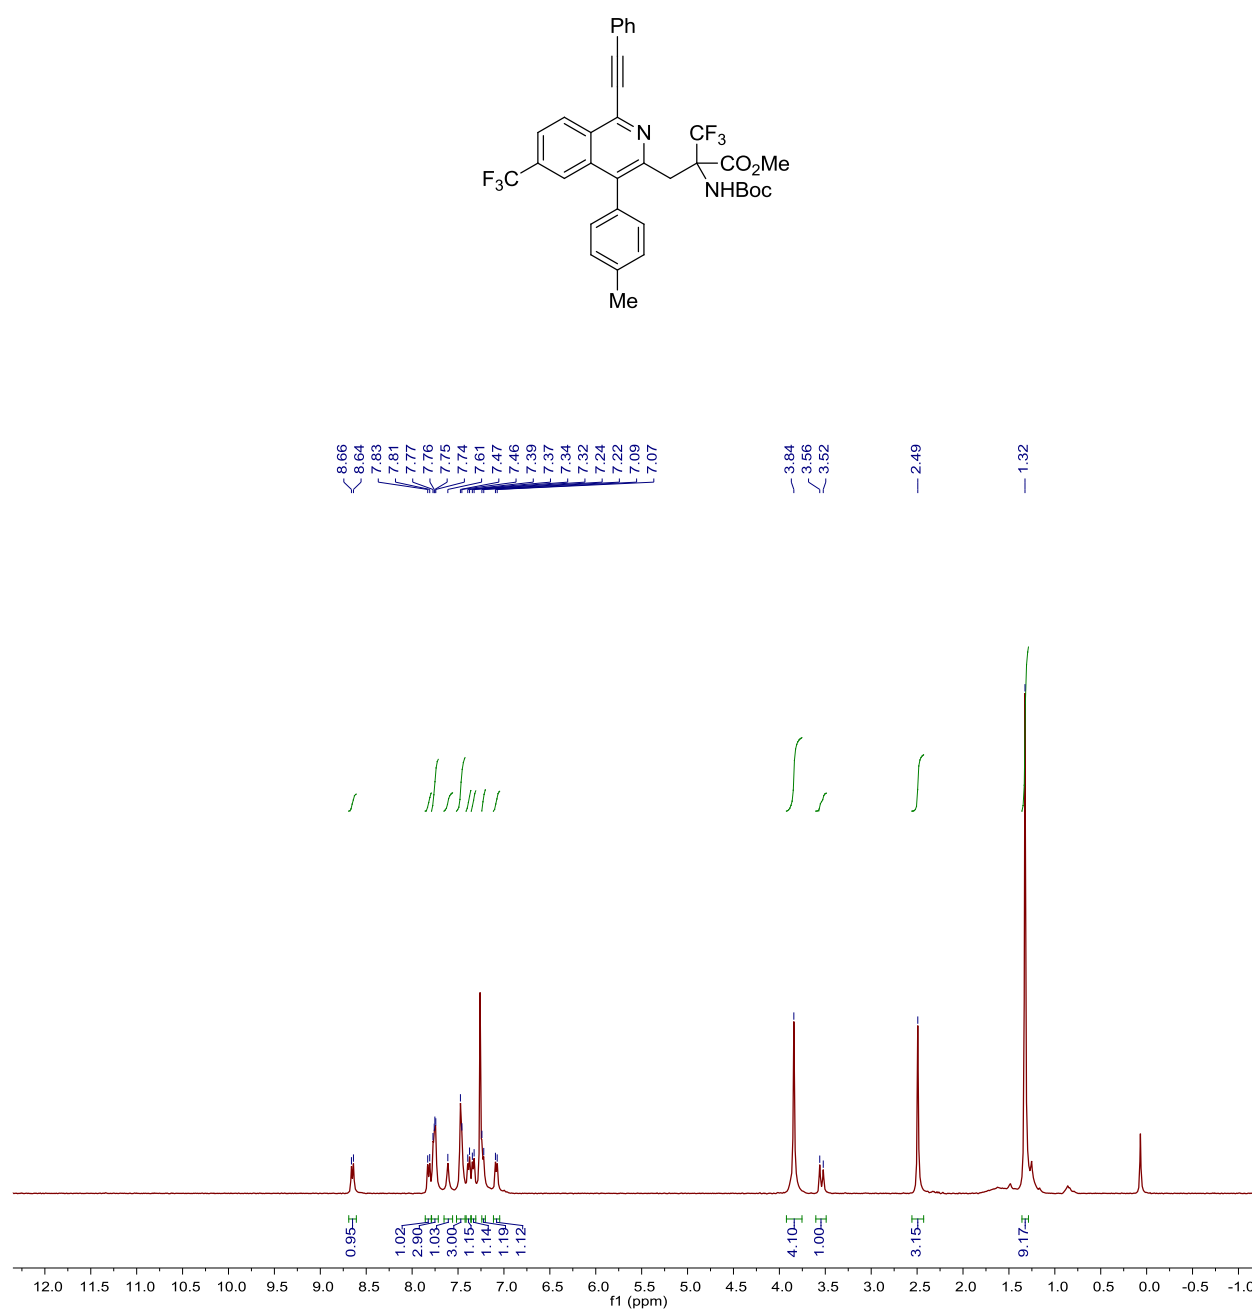

Figure S83.  $^1\text{H}$  spectrum of **6c** in  $\text{CDCl}_3$

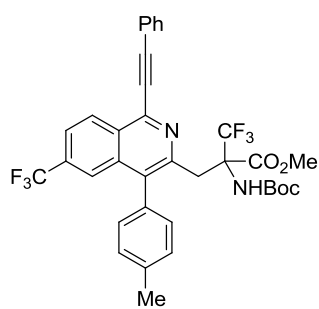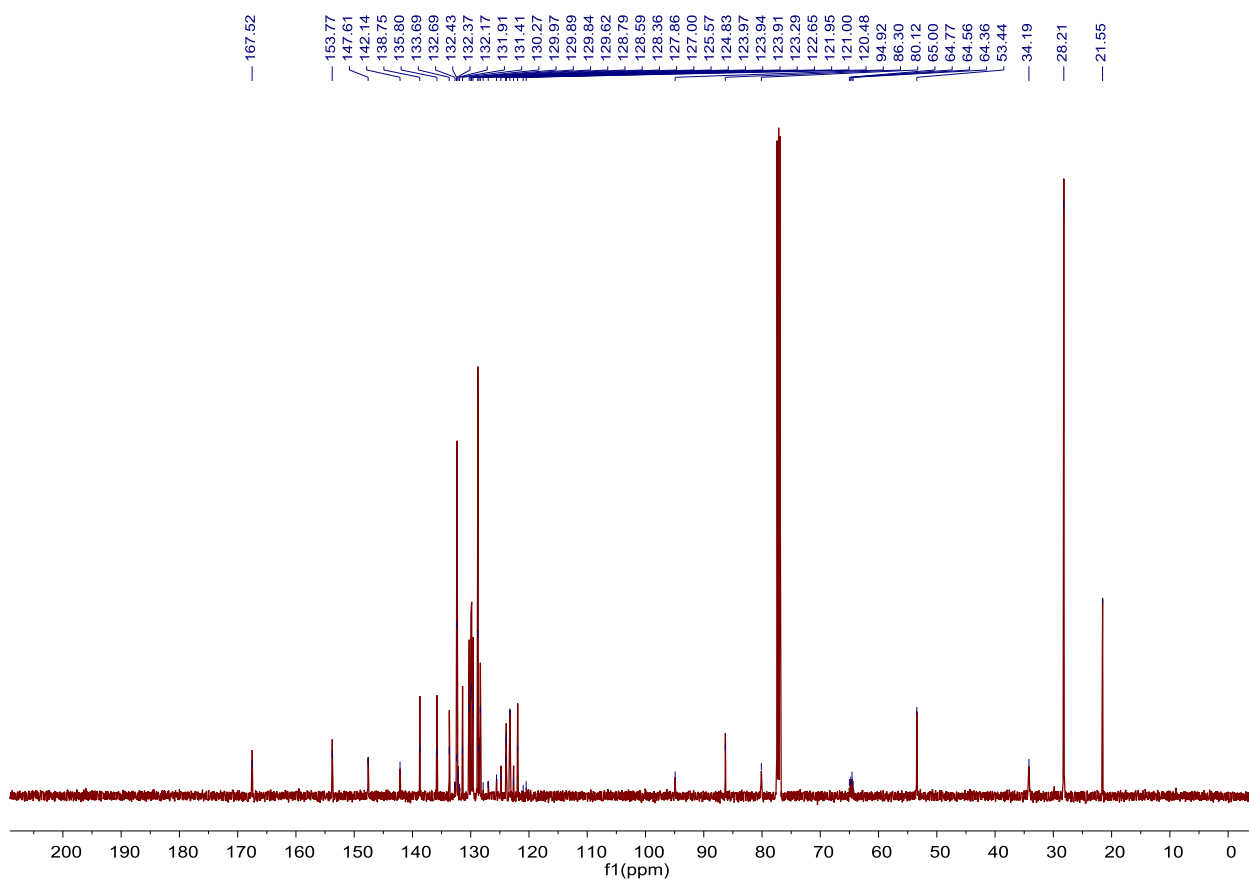

Figure S84.  $^{13}\text{C}$  spectrum of **6c** in  $\text{CDCl}_3$

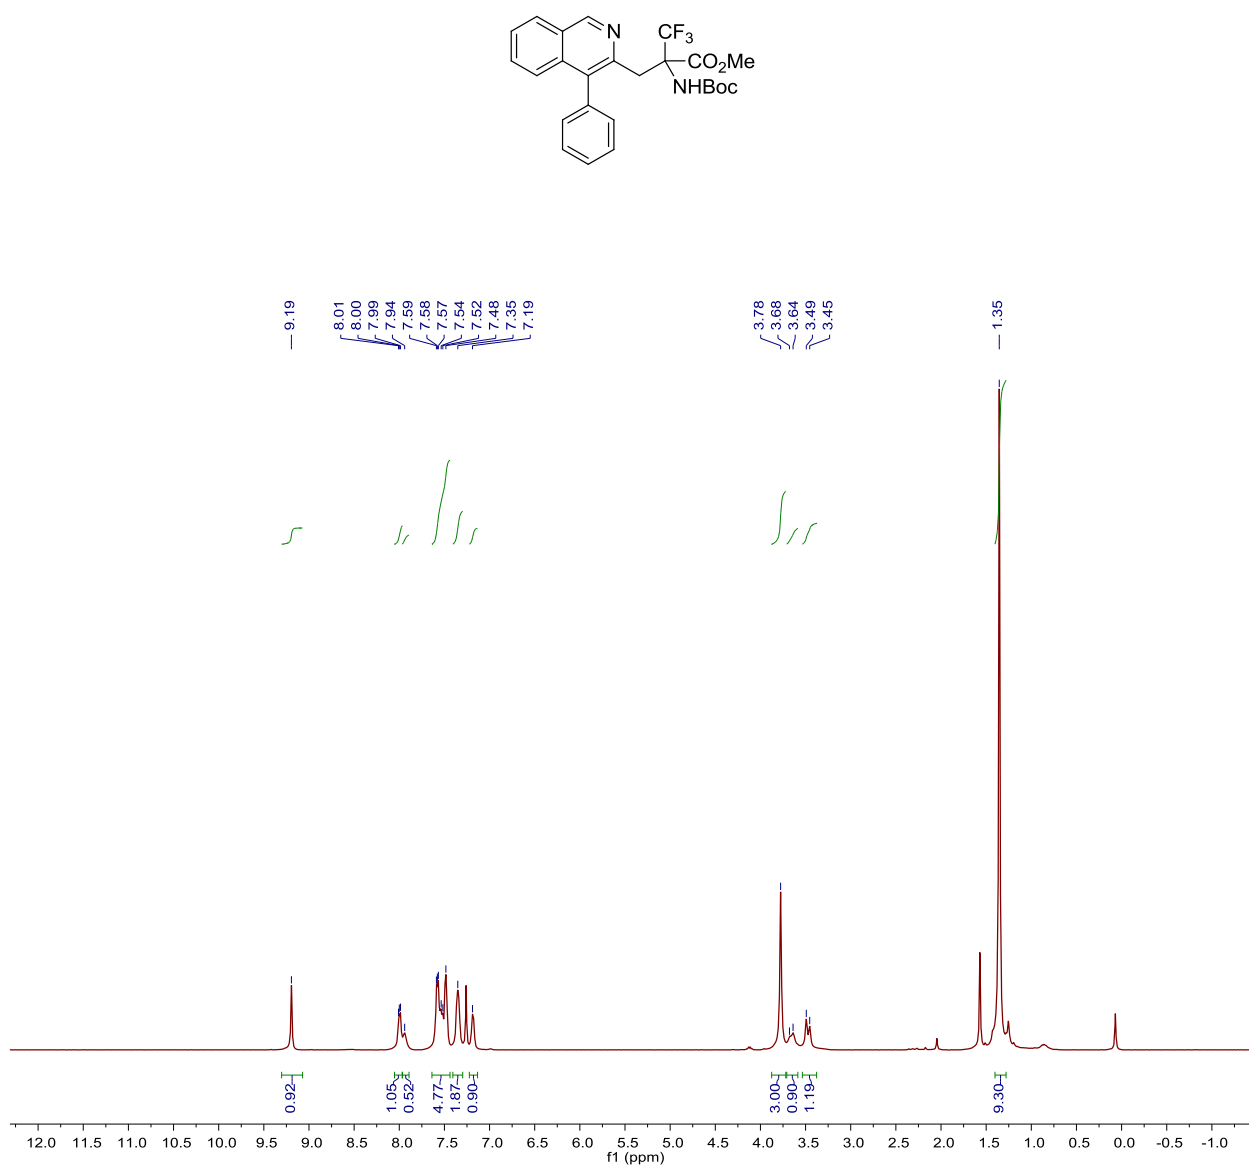

Figure S85.  $^1\text{H}$  spectrum of **7a** in CDCl<sub>3</sub>

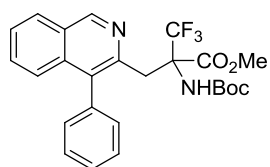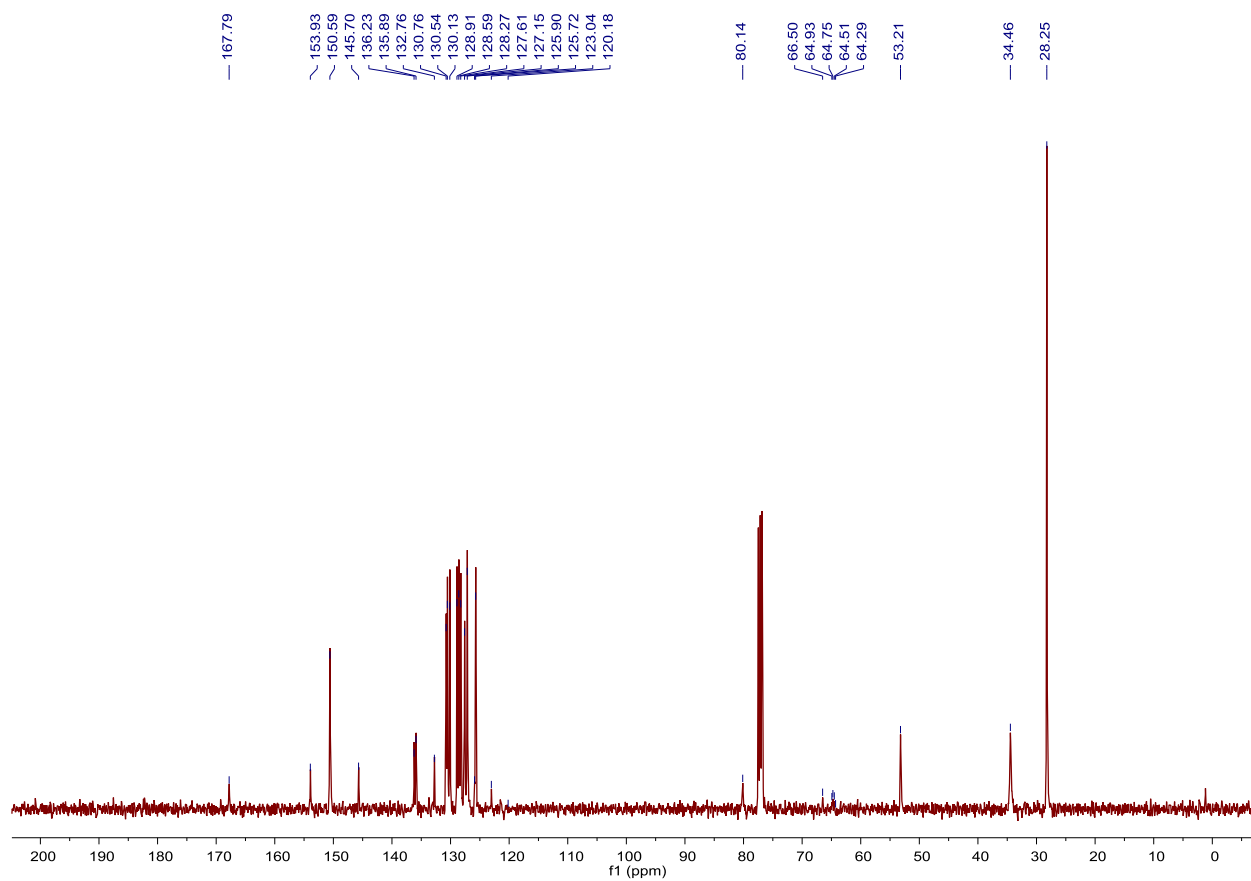

Figure S86.  $^{13}\text{C}$  spectrum of **7a** in  $\text{CDCl}_3$

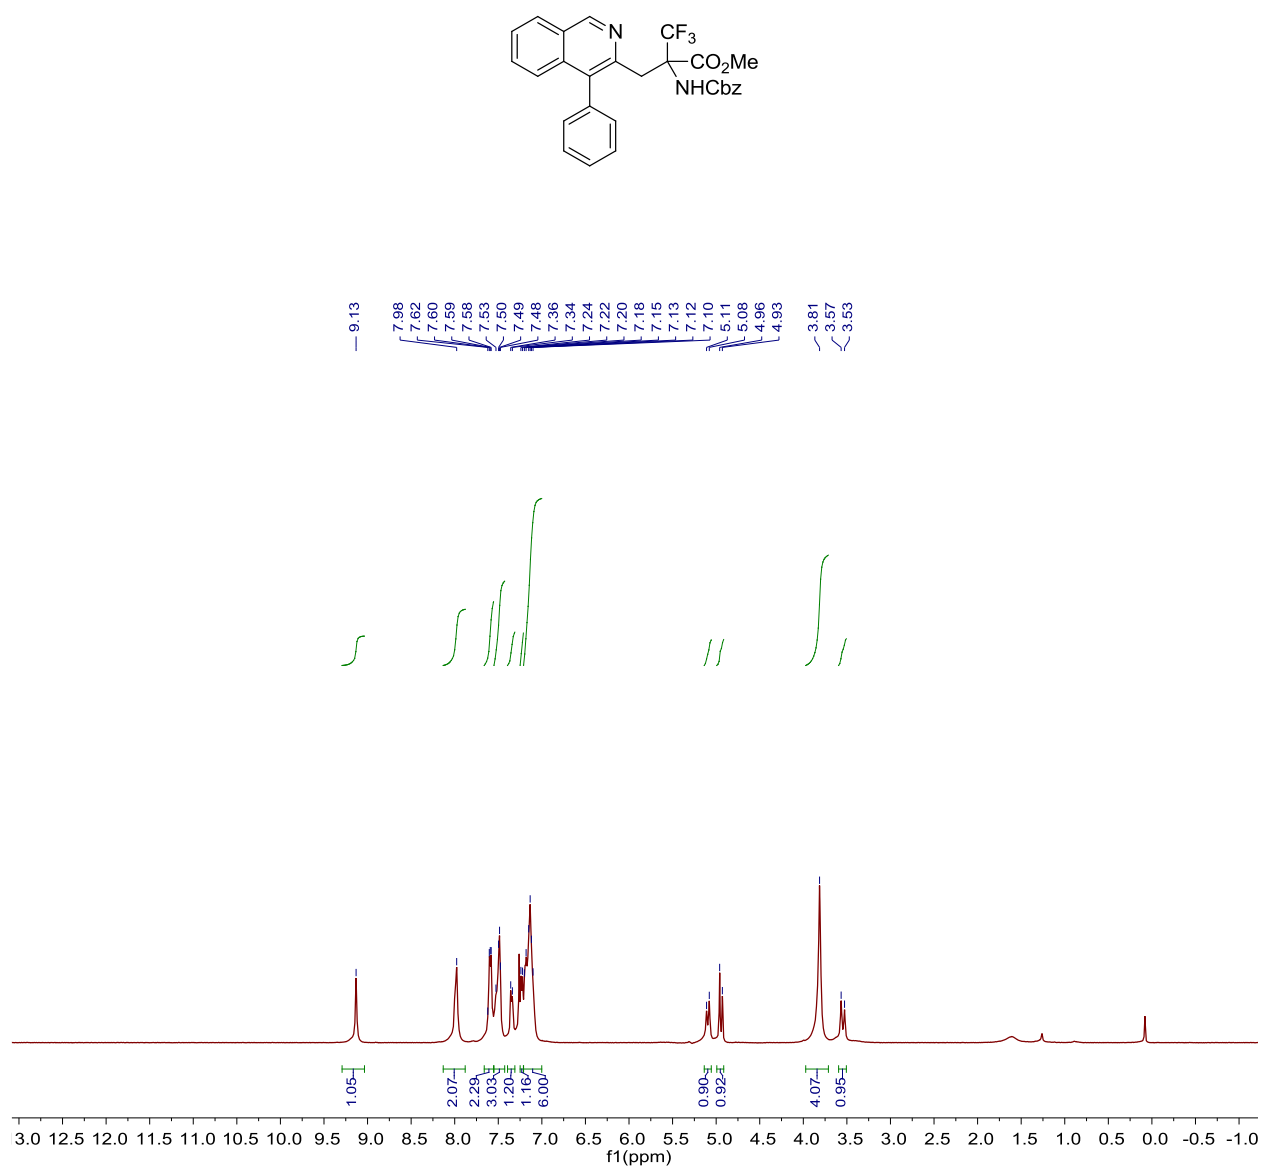

Figure S87.  $^1\text{H}$  spectrum of **7b** in CDCl<sub>3</sub>

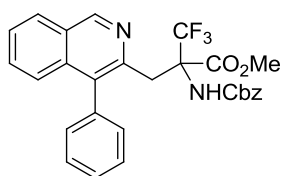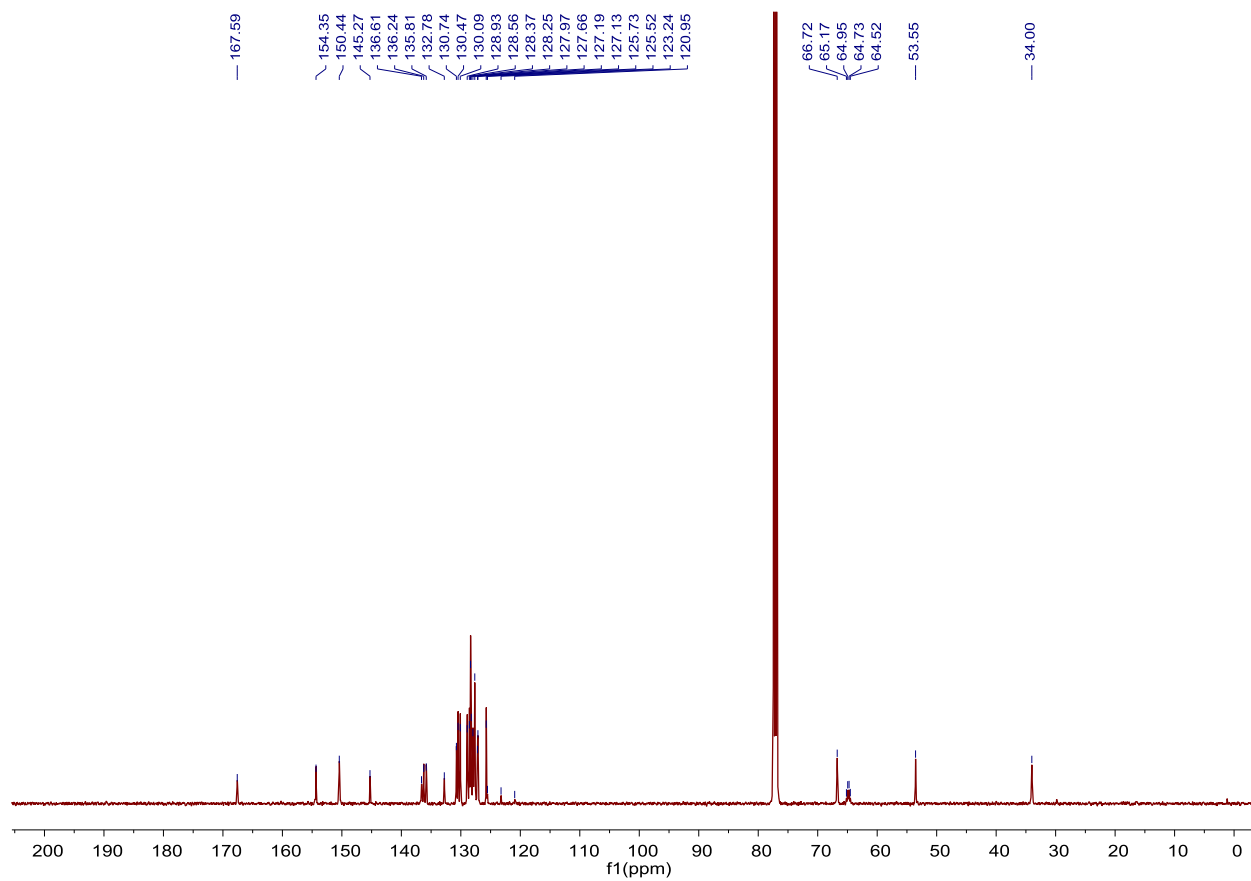

Figure S88.  $^{13}\text{C}$  spectrum of **7b** in  $\text{CDCl}_3$



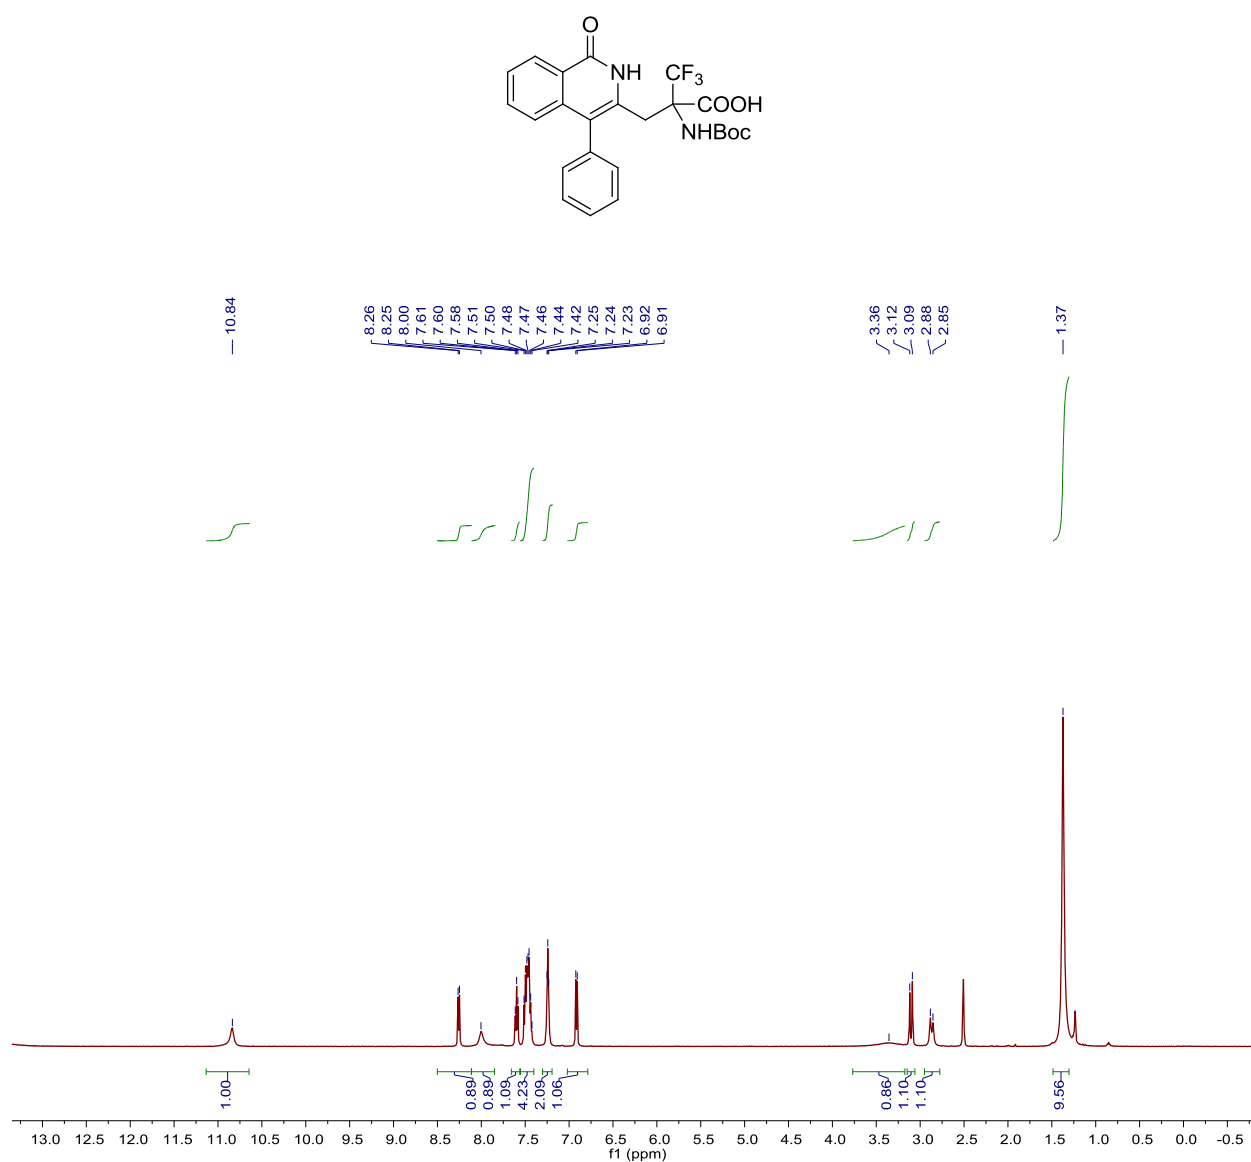

Figure S89.  $^1\text{H}$  spectrum of **8** in DMSO- $d_6$

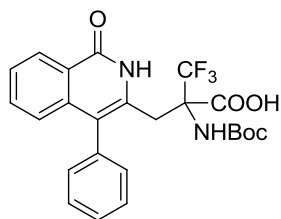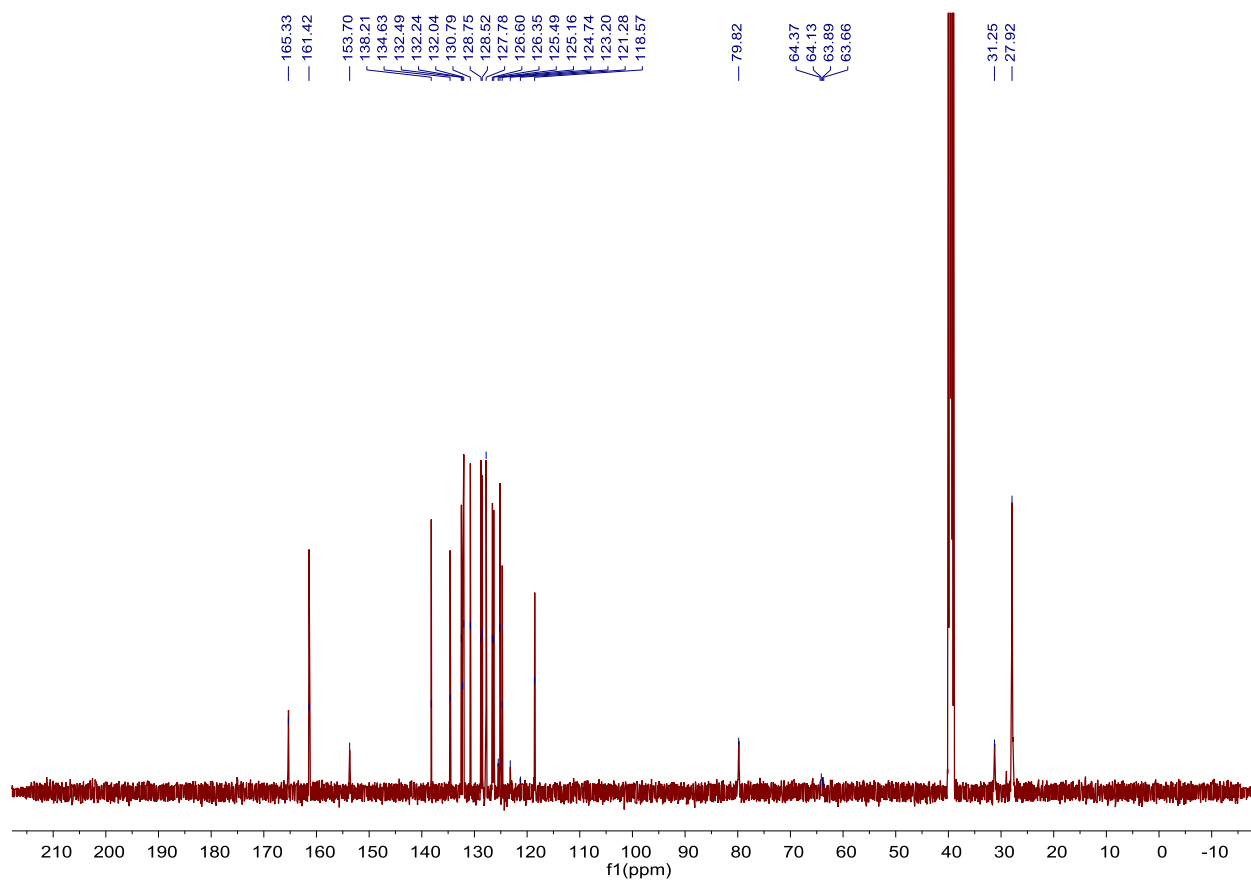

Figure S90.  $^{13}\text{C}$  spectrum of **8** in  $\text{DMSO-}d_6$

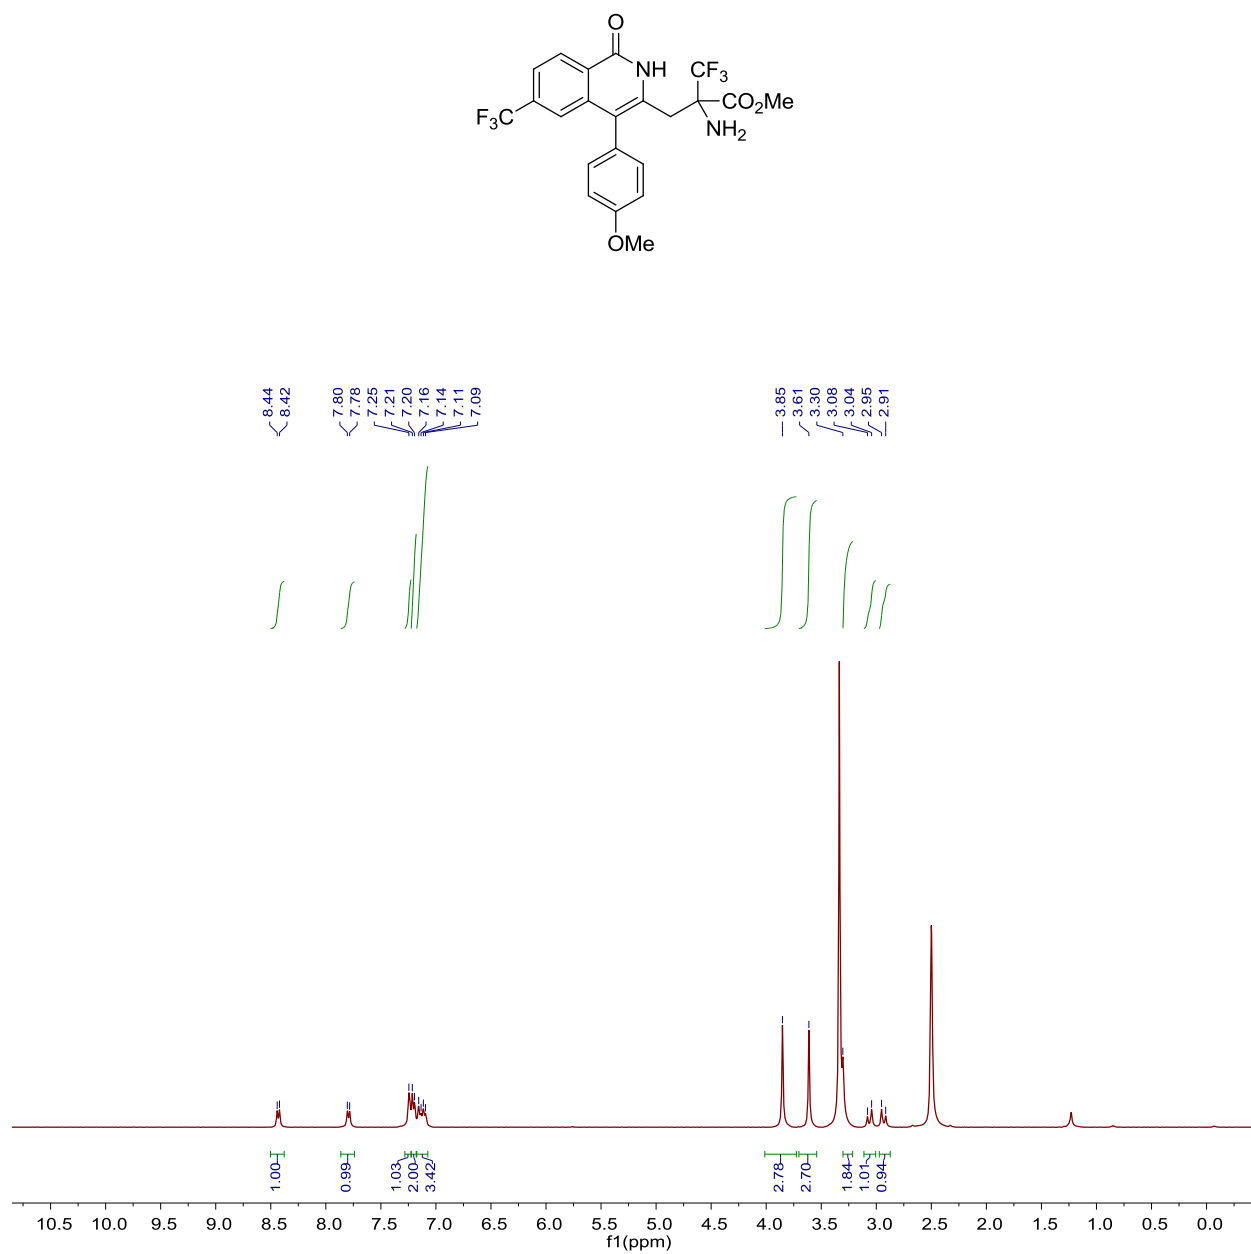

Figure S91.  $^1\text{H}$  spectrum of **9** in DMSO- $d_6$

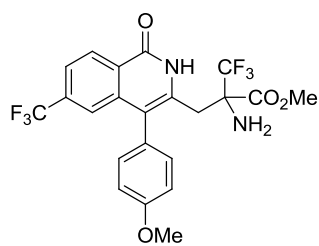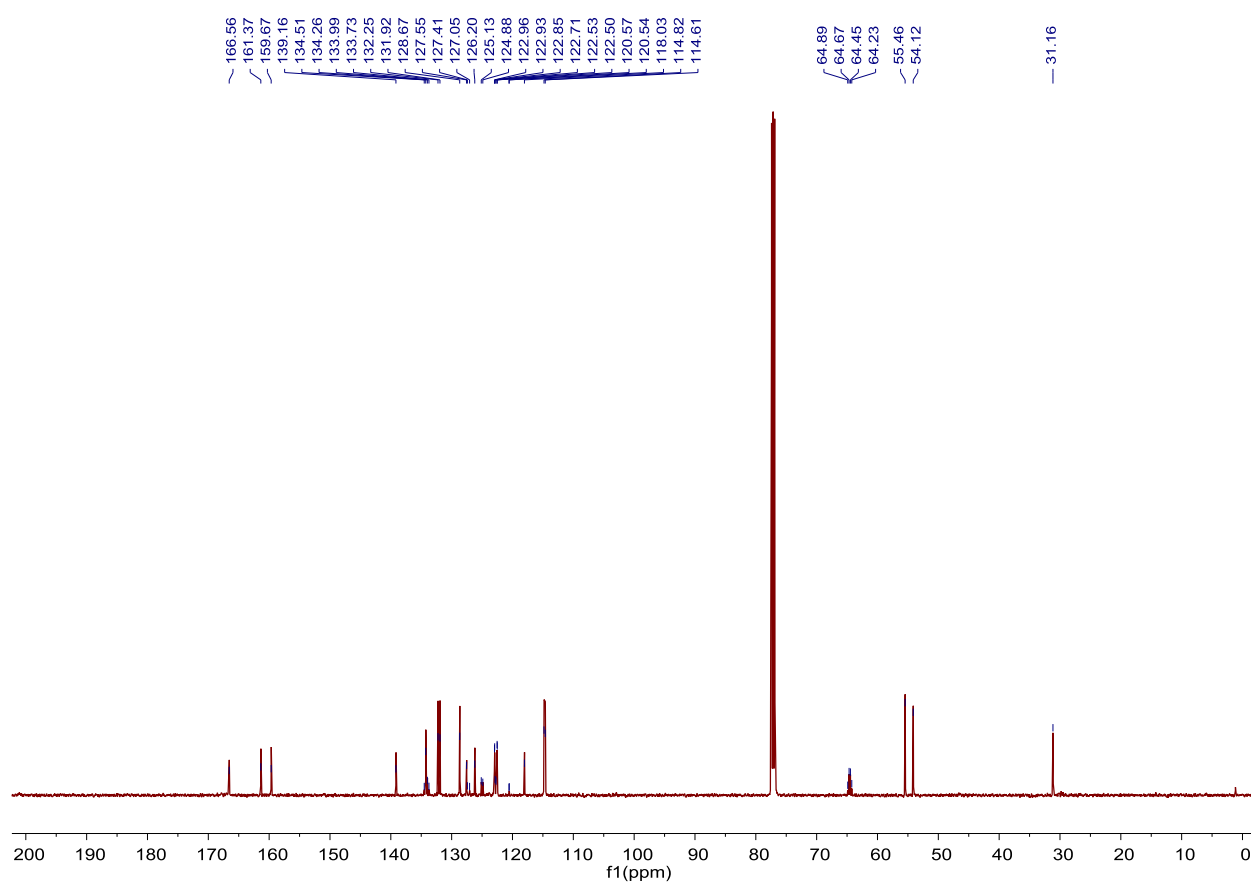

Figure S92.  $^{13}\text{C}$  spectrum of **9** in  $\text{CDCl}_3$

## 2. Proposed mechanism of [4+2]-annulation

A plausible reaction mechanism of regioselective [4+2]-annulation of aryl hydroxamate with internal acetylene-containing  $\alpha$ -CF<sub>3</sub>- $\alpha$ -amino esters **2** is depicted in Scheme 1S. After dissociation of the rhodium dimer, ligand exchange of the monomer with the present cesium salts provides a rhodium(III)-carboxylate species. Precomplexation to the directing N-pivaloyloxy amide moiety is followed by C-H activation to form rhodacycle **A**. The regioselective insertion of the alkyne triple bond into the C-Rh bond provides a seven-membered rhodacycle intermediate **B**. The observed selectivity can be probably explained by the coordination of Rh with the donor atom of alkyne according to its inherent polarity. Next, a concerted or stepwise C-N bond forming/N-O bond cleaving event occurs, affording the annulation product **3**, and releasing the Rh(III) catalyst.

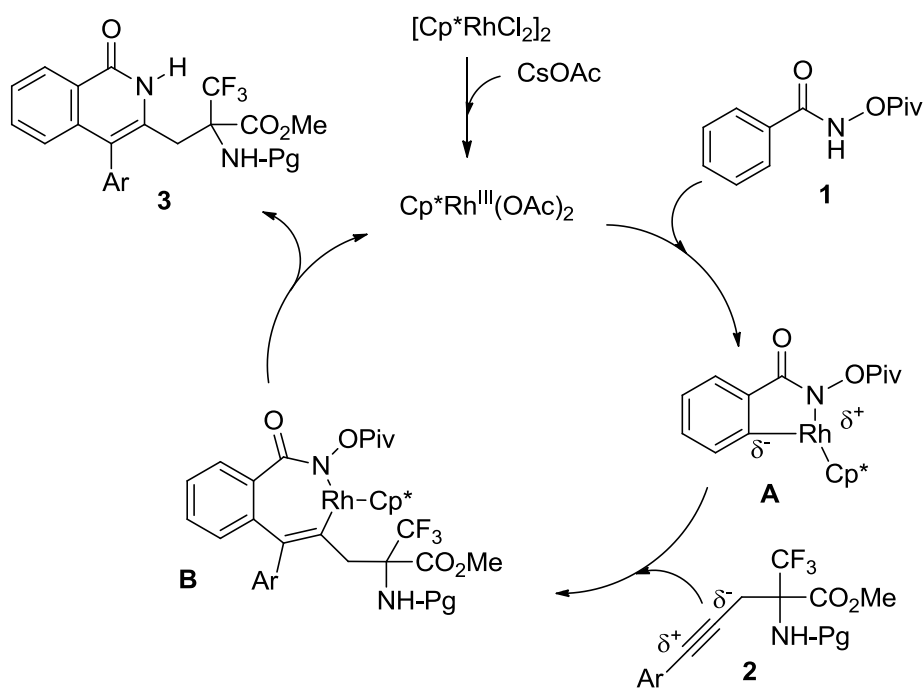

Scheme 1S. Proposed mechanism.

### 3. X-ray Diffraction Study

**Table S1.** Crystal data, data collection and structure refinement parameters for **3a**

|                                                                               |                                                                              |
|-------------------------------------------------------------------------------|------------------------------------------------------------------------------|
| CCDC                                                                          | 2217085                                                                      |
| Formula                                                                       | C <sub>25</sub> H <sub>25</sub> F <sub>3</sub> N <sub>2</sub> O <sub>5</sub> |
| molecular wt                                                                  | 490.47                                                                       |
| crystal size (mm)                                                             | 0.20×0.12×0.02                                                               |
| crystal syst                                                                  | monoclinic                                                                   |
| space group                                                                   | C2/c                                                                         |
| Temperature (K)                                                               | 150(2)                                                                       |
| <i>a</i> (Å)                                                                  | 26.096(5)                                                                    |
| <i>b</i> (Å)                                                                  | 13.702(4)                                                                    |
| <i>c</i> (Å)                                                                  | 13.291(4)                                                                    |
| $\beta$ (deg)                                                                 | 95.018(9)                                                                    |
| <i>V</i> (Å <sup>3</sup> )                                                    | 4734(2)                                                                      |
| <i>Z</i>                                                                      | 8                                                                            |
| <i>d</i> <sub>calc</sub> (g·cm <sup>-3</sup> )                                | 1.376                                                                        |
| linear absorption $\mu$ (cm <sup>-1</sup> )                                   | 1.11                                                                         |
| <i>T</i> <sub>min</sub> / <i>T</i> <sub>max</sub>                             | 0.769/0.862                                                                  |
| 2 $\theta$ <sub>max</sub> (deg)                                               | 50                                                                           |
| no. of unique reflns ( <i>R</i> <sub>int</sub> )                              | 4143 (0.1334)                                                                |
| no. of obs reflns ( <i>I</i> > 2 $\sigma$ ( <i>I</i> ))                       | 1782                                                                         |
| no. of params                                                                 | 329                                                                          |
| <i>R</i> <sub>1</sub> (on <i>F</i> for obsd reflns) <sup>a</sup>              | 0.0693                                                                       |
| <i>wR</i> <sub>2</sub> (on <i>F</i> <sup>2</sup> for all reflns) <sup>b</sup> | 0.1704                                                                       |
| <i>GOOF</i>                                                                   | 0.975                                                                        |
| Largest diff. peak/hole (e Å <sup>-3</sup> )                                  | 0.263/-0.246                                                                 |

$$^a R_1 = \Sigma ||F_o| - |F_c|| / \Sigma |F_o|$$

$$^b wR_2 = \{ \Sigma [w(F_o^2 - F_c^2)^2] / \Sigma w(F_o^2)^2 \}^{1/2}$$

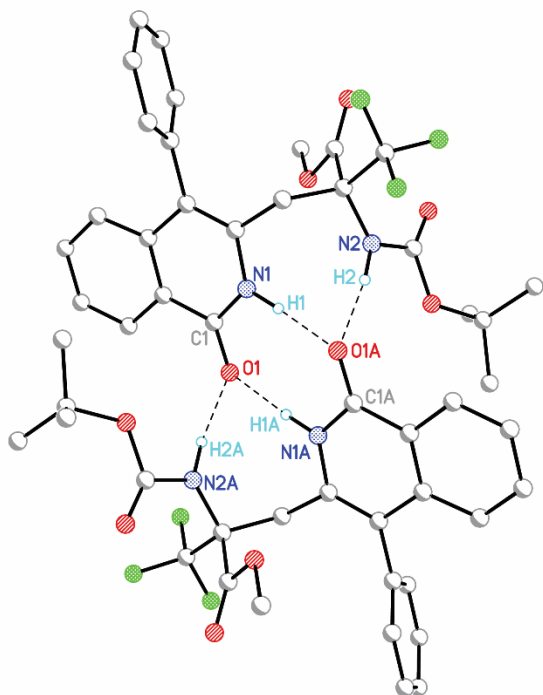

Figure S93. H-bonded dimer in the crystal of **3a**.

| D-H...A            | d(D-H)  | d(H...A) | d(D...A) | <(DHA) |
|--------------------|---------|----------|----------|--------|
| N(1)-H(1)...O(1)#1 | 0.96(6) | 1.91(5)  | 2.873(5) | 175(3) |
| N(2)-H(2)...O(1)#1 | 1.00(4) | 1.88(4)  | 2.862(5) | 170(4) |

Symmetry transformations used to generate equivalent atoms:

#1  $-x+1/2, -y+1/2, -z+1$
